# Supplementary material for: Silencing long ascending propriospinal neurons after spinal cord injury improves hindlimb stepping in the adult rat
Source: eLife. 2021 Dec 2;10:e70058. doi: 10.7554/eLife.70058 (PMC8639151; doi:10.7554/eLife.70058)
Supplement: Figure 1—figure supplement 1—source data 1. [file elife-70058-fig1-figsupp1-data1.xlsx]

## Sheet: Uninjured Proximal Angle
Animal ID	Control Right	Dox Right	Control Left	Dox Left
1	58.3554	53.3364	55.8386	52.8591
3	63.8745	58.7504	60.4724	55.2131
4	64.6197	59.5251	66.8822	63.7087
6	49.0226	55.149	55.8949	60.6309
7	59.5641	59.1048	66.5703	64.3816
8	67.5695	60.4641	63.6593	60.7701
9	53.924	49.2022	55.7894	53.837
11	58.0528	56.4208	61.2985	59.4993
12	58.8855	57.2352	63.2632	64.6904
14	56.232	57.6055	60.0044	54.6163
15	56.7554	57.2344	58.3406	57.8412
16	58.6024	54.7629	56.7578	55.8168
Average	58.7882	56.5659	60.3976	58.6554
St Deviation	4.93649	3.12003	4.04237	4.23762

## Sheet: Uninjured Distal Angle
Animal ID	Control Right	Dox Right	Control Left	Dox Left
1	50.9506	56.4264	54.9544	69.7027
3	59.8661	72.475	64.8315	76.3917
4	62.4774	63.7241	53.4108	62.5061
6	52.9972	76.57	53.2867	74.581
7	63.1931	75.345	61.3562	72.7237
8	59.2414	79.2492	59.4073	72.6246
9	53.3204	56.5266	49.9211	58.0337
11	54.3675	60.424	58.1889	65.9329
12	48.1991	55.6034	52.9976	53.1655
14	49.8949	67.2358	56.4382	69.21
15	57.2378	63.7025	57.1499	60.2981
16	58.3223	59.5895	52.431	64.5741
Average	55.839	65.5726	56.1978	66.6453
St Deviation	4.93825	8.46377	4.24258	7.16476
