# Supplementary material for: Silencing long ascending propriospinal neurons after spinal cord injury improves hindlimb stepping in the adult rat
Source: eLife. 2021 Dec 2;10:e70058. doi: 10.7554/eLife.70058 (PMC8639151; doi:10.7554/eLife.70058)
Supplement: Figure 2—source data 1. [file elife-70058-fig2-data1.xlsx]

## Sheet: Pre-Injury Control Phase Data
Time point	Animal ID	Hindlimb Phase	Heterolateral Phase	Homolateral Phase	Forelimb Phase			Time point	Animal ID	Hindlimb Phase	Heterolateral Phase	Homolateral Phase	Forelimb Phase			Time point	Animal ID	Hindlimb Phase	Heterolateral Phase	Homolateral Phase	Forelimb Phase
BL	1	0.571429	0.0454545	0.545455	0.55			PD1	1	0.5	0.115385	0.615385	0.566667			PostD1	1	0.541667	0	0.541667	0.535714
BL	1	0.590909	0.0454545	0.583333	0.5			PD1	1	0.56	0.12	0.64	0.52			PostD1	1	0.608696	0.0384615	0.565217	0.583333
BL	1	0.5	0.133333	0.566667	0.518519			PD1	1	0.576923	0.115385	0.538462	0.56			PostD1	1	0.6	0.166667	0.52	0.538462
BL	1	0.518519	0.111111	0.62963	0.5			PD1	1	0.5	0.0909091	0.636364	0.521739			PostD1	1	0.552632	0	0.578947	0.514286
BL	1	0.566667	0.0333333	0.6	0.53125			PD1	1	0.538462	0.0769231	0.653846	0.517241			PostD1	1	0.515152	0.105263	0.545455	0.542857
BL	1	0.545455	0.0909091	0.576923	0.5			PD1	1	0.566667	0.148148	0.533333	0.5			PostD1	1	0.612903	0.0606061	0.516129	0.53125
BL	1	0.580645	0	0.580645	0.59375			PD1	1	0.541667	0.0833333	0.583333	0.521739			PostD1	1	0.59375	0.0645161	0.53125	0.580645
BL	1	0.586207	0.0344828	0.586207	0.56			PD1	1	0.516129	0.0322581	0.548387	0.59375			PostD1	1	0.625	0.0625	0.583333	0.625
BL	1	0.575	0.1	0.55	0.529412			PD1	1	0.578947	0	0.578947	0.55			PostD1	1	0.64	0.0416667	0.56	0.565217
BL	1	0.5	0.05	0.566667	0.52			PD1	1	0.52381	0.0952381	0.52381	0.526316			PostD1	1	0.571429	0.04	0.535714	0.5
BL	1	0.5	0.0384615	0.576923	0.586207			PD1	1	0.521739	0.173913	0.695652	0.545455			PostD1	1	0.5	0.04	0.576923	0.555556
BL	1	0.5	0.125	0.541667	0.588235			PD1	1	0.517241	0.206897	0.551724	0.62963			PostD1	1	0.576923	0.0357143	0.5	0.533333
BL	1	0.5	0.05	0.65	0.545455			PD1	1	0.55	0.05	0.55	0.5			PostD1	3	0.517241	0.0517241	1	0.516129
BL	1	0.518519	0.111111	0.592593	0.545455			PD1	3	0.540541	0.1	0.513514	0.527778			PostD1	3	0.517241	0.0482759	1	0.5
BL	3	0.551724	0	0.517241	0.56			PD1	3	0.5	0.0540541	0.55	0.533333			PostD1	3	0.578947	0.0263158	0.605263	0.6
BL	3	0.588235	0.137931	0.5	0.552632			PD1	3	0.518519	0	0.518519	0.518519			PostD1	3	0.529412	0.0526316	0.588235	0.529412
BL	3	0.52	0.0588235	0.56	0.576923			PD1	3	0.52	0	0.52	0.5			PostD1	3	0.518519	0.037037	0.518519	0.518519
BL	3	0.5	0.0333333	0.533333	0.5			PD1	3	0.56	0	0.56	0.56			PostD1	3	0.571429	0.0464286	0.928571	0.535714
BL	3	0.517241	0	0.517241	0.526316			PD1	3	0.52	0	0.52	0.5			PostD1	3	0.533333	0.0433333	0.933333	0.535714
BL	3	0.655172	0	0.862069	0.583333			PD1	3	0.5	0	0.5	0.538462			PostD1	3	0.548387	0.0322581	0.516129	0.5
BL	3	0.609756	0	0.512195	0.536585			PD1	3	0.551724	0.172414	0.586207	0.571429			PostD1	3	0.518519	0	0.518519	0.551724
BL	3	0.516129	0.0731707	0.612903	0.560976			PD1	3	0.571429	0.178571	0.535714	0.642857			PostD1	3	0.5	0	0.5	0.514286
BL	3	0.512195	0.0731707	0.536585	0.555556			PD1	3	0.527778	0.0555556	0.5	0.589744			PostD1	4	0.583333	0.111111	0.583333	0.514286
BL	3	0.588235	0.097561	0.558824	0.5			PD1	3	0.545455	0.0909091	0.545455	0.52381			PostD1	4	0.527778	0.0833333	0.555556	0.540541
BL	3	0.585366	0.0243902	0.585366	0.5			PD1	3	0.55	0	0.5	0.5			PostD1	4	0.586207	0	0.551724	0.533333
BL	3	0.518519	0	0.518519	0.548387			PD1	3	0.565217	0.0434783	0.565217	0.590909			PostD1	4	0.518519	0.03125	0.518519	0.535714
BL	3	0.5	0.0322581	0.541667	0.518519			PD1	3	0.517241	0	0.517241	0.53125			PostD1	4	0.5	0.03125	0.5	0.5
BL	3	0.538462	0.0384615	0.5	0.538462			PD1	4	0.585366	0.097561	0.560976	0.611111			PostD1	4	0.538462	0.0384615	0.576923	0.518519
BL	4	0.555556	0	0.62963	0.571429			PD1	4	0.526316	0.157895	0.736842	0.571429			PostD1	4	0.535714	0.107143	0.571429	0.5
BL	4	0.5	0.0625	0.576923	0.5			PD1	4	0.541667	0	0.541667	0.56			PostD1	4	0.607143	0	0.535714	0.53125
BL	4	0.5	0.04	0.590909	0.5			PD1	4	0.52	0.04	0.56	0.545455			PostD1	4	0.538462	0.0769231	0.538462	0.5
BL	4	0.535714	0.0454545	0.571429	0.535714			PD1	4	0.538462	0.08	0.538462	0.518519			PostD1	4	0.62069	0	0.62069	0.615385
BL	4	0.56	0	0.56	0.551724			PD1	4	0.592593	0.111111	0.518519	0.592593			PostD1	4	0.586207	0	0.517241	0.5
BL	4	0.590909	0	0.545455	0.5			PD1	4	0.538462	0.0769231	0.538462	0.555556			PostD1	4	0.6	0.0344828	0.533333	0.517241
BL	4	0.611111	0.0434783	0.611111	0.611111			PD1	4	0.52	0.08	0.52	0.521739			PostD1	4	0.5625	0.0666667	0.59375	0.5
BL	4	0.521739	0.0384615	0.565217	0.52381			PD1	4	0.545455	0	0.590909	0.571429			PostD1	4	0.5	0	0.576923	0.555556
BL	4	0.565217	0.0769231	0.565217	0.521739			PD1	4	0.521739	0.0454545	0.521739	0.521739			PostD1	4	0.535714	0.0714286	0.571429	0.538462
BL	4	0.538462	0.130435	0.576923	0.565217			PD1	4	0.533333	0	0.633333	0.592593			PostD1	6	0.533333	0.133333	0.533333	0.555556
BL	4	0.551724	0.0967742	0.586207	0.533333			PD1	4	0.517241	0.1	0.586207	0.535714			PostD1	6	0.6	0.04	0.6	0.5
BL	4	0.548387	0	0.518519	0.548387			PD1	4	0.518519	0	0.555556	0.571429			PostD1	6	0.65	0.05	0.6	0.541667
BL	4	0.517241	0.0740741	0.592593	0.517241			PD1	4	0.548387	0.0322581	0.516129	0.517241			PostD1	6	0.571429	0.0416667	0.52381	0.5
BL	4	0.518519	0.0384615	0.576923	0.56			PD1	6	0.564103	0.205128	0.717949	0.606061			PostD1	6	0.541667	0.0416667	0.5	0.5
BL	4	0.555556	0.0344828	0.517241	0.535714			PD1	6	0.580645	0.16129	0.709677	0.5			PostD1	6	0.521739	0.0434783	0.565217	0.521739
BL	6	0.5	0.192308	0.730769	0.518519			PD1	6	0.621622	0.216216	0.621622	0.558824			PostD1	6	0.583333	0.037037	0.541667	0.538462
BL	6	0.551724	0.103448	0.793103	0.645161			PD1	6	0.542857	0.114286	0.742857	0.564103			PostD1	6	0.518519	0.111111	0.555556	0.521739
BL	6	0.56	0.16	0.72	0.56			PD1	6	0.521739	0.0869565	0.565217	0.5			PostD1	6	0.615385	0.0769231	0.538462	0.538462
BL	6	0.5	0.133333	0.6	0.533333			PD1	6	0.583333	0.125	0.583333	0.521739			PostD1	6	0.625	0.0833333	0.541667	0.5
BL	6	0.538462	0.153846	0.653846	0.5			PD1	6	0.538462	0.0769231	0.692308	0.592593			PostD1	6	0.571429	0	0.52381	0.52381
BL	6	0.55	0.1	0.7	0.571429			PD1	6	0.5	0.0833333	0.541667	0.521739			PostD1	6	0.5	0.1	0.566667	0.583333
BL	6	0.5	0.0909091	0.590909	0.5			PD1	6	0.583333	0.125	0.75	0.652174			PostD1	6	0.56	0.04	0.52	0.52
BL	6	0.5	0.235294	0.625	0.52			PD1	6	0.56	0.0588235	0.56	0.5			PostD1	6	0.545455	0.0454545	0.590909	0.545455
BL	6	0.52	0.125	0.68	0.56			PD1	6	0.588235	0.0416667	0.705882	0.55			PostD1	7	0.545455	0.0909091	0.545455	0.516129
BL	6	0.5	0.15	0.7	0.521739			PD1	6	0.541667	0	0.5	0.521739			PostD1	7	0.566667	0.0666667	0.533333	0.533333
BL	6	0.578947	0.105263	0.631579	0.5			PD1	6	0.545455	0	0.5	0.5			PostD1	7	0.5625	0.125	0.59375	0.517241
BL	6	0.5	0.1	0.65	0.55			PD1	6	0.5	0	0.6	0.6			PostD1	7	0.5	0.121212	0.5	0.514286
BL	6	0.578947	0.0526316	0.631579	0.55			PD1	6	0.526316	0.0909091	0.5	0.55			PostD1	7	0.636364	0.121212	0.545455	0.5625
BL	6	0.578947	0.0526316	0.578947	0.526316			PD1	7	0.576923	0.153846	0.615385	0.571429			PostD1	7	0.545455	0	0.575758	0.517241
BL	6	0.555556	0.0555556	0.611111	0.555556			PD1	7	0.518519	0.0740741	0.592593	0.517241			PostD1	7	0.516129	0.0333333	0.516129	0.516129
BL	7	0.583333	0	0.666667	0.619048			PD1	7	0.533333	0.133333	0.6	0.533333			PostD1	7	0.5	0.0322581	0.571429	0.548387
BL	7	0.52	0.125	0.6	0.518519			PD1	7	0.631579	0.157895	0.736842	0.611111			PostD1	7	0.5	0.0666667	0.533333	0.5
BL	7	0.6	0	0.565217	0.578947			PD1	7	0.578947	0.131579	0.5	0.641026			PostD1	7	0.53125	0.0344828	0.516129	0.516129
BL	7	0.56	0	0.52	0.541667			PD1	7	0.555556	0	0.62963	0.677419			PostD1	7	0.529412	0.0285714	0.5625	0.53125
BL	7	0.590909	0.08	0.56	0.565217			PD1	7	0.588235	0.117647	0.558824	0.517241			PostD1	8	0.52381	0	0.52381	0.5
BL	7	0.652174	0	0.565217	0.526316			PD1	7	0.5	0.0294118	0.535714	0.518519			PostD1	8	0.6	0.05	0.5	0.55
BL	7	0.608696	0.173913	0.565217	0.56			PD1	7	0.551724	0.137931	0.586207	0.5			PostD1	8	0.608696	0.0521739	0.913043	0.583333
BL	7	0.592593	0.185185	0.592593	0.541667			PD1	7	0.52	0	0.52	0.535714			PostD1	8	0.636842	0.210526	0.578947	0.631579
BL	7	0.545455	0.121212	0.515152	0.647059			PD1	7	0.56	0.12	0.6	0.5			PostD1	8	0.571429	0.2	0.52381	0.52381
BL	7	0.5	0.0384615	0.538462	0.541667			PD1	7	0.652174	0.0434783	0.521739	0.521739			PostD1	8	0.52381	0.047619	0.52381	0.526316
BL	7	0.545455	0	0.575758	0.575758			PD1	7	0.521739	0.0869565	0.521739	0.545455			PostD1	8	0.5	0.0952381	0.5	0.541667
BL	8	0.541667	0.181818	0.625	0.52			PD1	7	0.565217	0.130435	0.608696	0.52381			PostD1	8	0.7	0.15	0.55	0.55
BL	8	0.5	0.125	0.583333	0.5			PD1	8	0.52	0.08	0.56	0.52			PostD1	8	0.52381	0.047619	0.52381	0.55
BL	8	0.578947	0	0.684211	0.578947			PD1	8	0.551724	0.137931	0.586207	0.518519			PostD1	8	0.545455	0.0909091	0.5	0.571429
BL	8	0.52381	0.0526316	0.619048	0.52381			PD1	8	0.516129	0.193548	0.677419	0.517241			PostD1	9	0.516129	0.16129	0.677419	0.533333
BL	8	0.6	0	0.6	0.526316			PD1	8	0.5	0	0.5	0.55			PostD1	9	0.517241	0.137931	0.689655	0.533333
BL	8	0.52381	0.05	0.52381	0.55			PD1	8	0.5	0.0909091	0.5	0.571429			PostD1	9	0.52	0.04	0.56	0.52
BL	8	0.526316	0.0526316	0.526316	0.5625			PD1	8	0.555556	0.0555556	0.5	0.529412			PostD1	9	0.516129	0.0645161	0.612903	0.548387
BL	8	0.55	0.05	0.6	0.526316			PD1	8	0.52381	0.0952381	0.571429	0.5			PostD1	9	0.516129	0.0645161	0.645161	0.580645
BL	8	0.555556	0	0.611111	0.5			PD1	8	0.571429	0.0625	0.5625	0.571429			PostD1	9	0.708333	0.0833333	0.625	0.566667
BL	8	0.526316	0.111111	0.578947	0.52381			PD1	8	0.52381	0	0.571429	0.545455			PostD1	9	0.62069	0.206897	0.62069	0.52
BL	8	0.526316	0.0526316	0.578947	0.55			PD1	8	0.5	0	0.52381	0.521739			PostD1	9	0.512821	0.025641	0.641026	0.606061
BL	8	0.52381	0.047619	0.52381	0.526316			PD1	8	0.52381	0	0.545455	0.5			PostD1	9	0.5	0.128205	0.638889	0.526316
BL	9	0.571429	0	0.857143	0.56			PD1	8	0.55	0.142857	0.571429	0.526316			PostD1	9	0.533333	0.0333333	0.766667	0.628571
BL	9	0.521739	0.190476	0.695652	0.521739			PD1	8	0.55	0.05	0.5	0.52381			PostD1	9	0.567568	0.027027	0.540541	0.513514
BL	9	0.565217	0.173913	0.73913	0.565217			PD1	9	0.517241	0.172414	0.758621	0.566667			PostD1	9	0.5625	0.0606061	0.5625	0.545455
BL	9	0.52	0.16	0.6	0.521739			PD1	9	0.5	0.142857	0.607143	0.551724			PostD1	9	0.515152	0.030303	0.545455	0.533333
BL	9	0.52381	0.142857	0.666667	0.5			PD1	9	0.571429	0.178571	0.714286	0.555556			PostD1	9	0.5	0.0357143	0.571429	0.535714
BL	9	0.65	0	0.65	0.588235			PD1	9	0.545455	0.08	0.727273	0.666667			PostD1	11	0.553191	0	0.617021	0.581395
BL	9	0.52381	0.15	0.571429	0.571429			PD1	9	0.56	0.08	0.56	0.571429			PostD1	11	0.55102	0.148936	0.714286	0.55
BL	9	0.548387	0.16129	0.709677	0.586207			PD1	9	0.55	0.1	0.65	0.52381			PostD1	11	0.625	0.163265	0.7	0.5625
BL	9	0.5625	0.03125	0.625	0.527778			PD1	9	0.578947	0	0.578947	0.52381			PostD1	11	0.517241	0.0344828	0.62069	0.53125
BL	9	0.571429	0.178571	0.785714	0.576923			PD1	9	0.526316	0.157895	0.631579	0.5625			PostD1	11	0.566667	0.111111	0.533333	0.516129
BL	9	0.521739	0.0869565	0.73913	0.545455			PD1	9	0.590909	0.181818	0.636364	0.52381			PostD1	11	0.518519	0.178571	0.666667	0.516129
BL	9	0.5	0.1	0.7	0.545455			PD1	9	0.529412	0	0.588235	0.588235			PostD1	11	0.535714	0.0689655	0.607143	0.538462
BL	9	0.52381	0.0952381	0.571429	0.565217			PD1	9	0.555556	0	0.555556	0.619048			PostD1	11	0.551724	0.0666667	0.655172	0.53125
BL	9	0.5	0.0454545	0.5	0.529412			PD1	9	0.578947	0	0.631579	0.611111			PostD1	11	0.5	0.03125	0.566667	0.5
BL	11	0.545455	0	0.727273	0.647059			PD1	9	0.52381	0.0526316	0.571429	0.5			PostD1	11	0.59375	0.03125	0.5625	0.59375
BL	11	0.545455	0.227273	0.681818	0.545455			PD1	9	0.52381	0.285714	0.666667	0.529412			PostD1	11	0.59375	0.09375	0.5625	0.535714
BL	11	0.5	0.227273	0.625	0.56			PD1	9	0.52	0.2	0.68	0.538462			PostD1	11	0.516129	0.0967742	0.645161	0.514286
BL	11	0.555556	0	0.666667	0.625			PD1	11	0.555556	0.166667	0.611111	0.555556			PostD1	11	0.555556	0.037037	0.666667	0.5
BL	11	0.52381	0.111111	0.571429	0.52381			PD1	11	0.611111	0.166667	0.611111	0.555556			PostD1	11	0.540541	0.0810811	0.540541	0.538462
BL	11	0.52381	0.0952381	0.666667	0.52381			PD1	11	0.5	0.333333	0.722222	0.631579			PostD1	12	0.551724	0.0344828	0.551724	0.53125
BL	11	0.590909	0.142857	0.590909	0.6			PD1	11	0.55	0.2	0.75	0.5			PostD1	12	0.517241	0.0689655	0.586207	0.535714
BL	11	0.538462	0.227273	0.576923	0.535714			PD1	11	0.588235	0.176471	0.705882	0.5			PostD1	12	0.513514	0.0810811	0.513514	0.533333
BL	11	0.529412	0	0.588235	0.5625			PD1	11	0.545455	0.0909091	0.636364	0.5			PostD1	12	0.580645	0.108108	0.580645	0.548387
BL	11	0.578947	0.0588235	0.526316	0.555556			PD1	11	0.545455	0.136364	0.636364	0.5			PostD1	12	0.571429	0.129032	0.571429	0.535714
BL	11	0.526316	0.0526316	0.578947	0.5			PD1	11	0.551724	0.103448	0.793103	0.551724			PostD1	12	0.512821	0.153846	0.512821	0.588235
BL	11	0.52381	0.142857	0.571429	0.526316			PD1	11	0.576923	0.115385	0.576923	0.538462			PostD1	12	0.580645	0.16129	0.580645	0.59375
BL	11	0.52381	0	0.619048	0.555556			PD1	11	0.5	0.05	0.6	0.5			PostD1	12	0.55	0.0243902	0.525	0.5
BL	11	0.571429	0.047619	0.52381	0.52381			PD1	11	0.529412	0.1	0.529412	0.571429			PostD1	12	0.560976	0.0487805	0.536585	0.552632
BL	12	0.571429	0	0.607143	0.576923			PD1	11	0.55	0.117647	0.55	0.5			PostD1	12	0.521739	0.0652174	0.521739	0.540541
BL	12	0.558824	0.0714286	0.5	0.558824			PD1	11	0.647059	0.176471	0.588235	0.611111			PostD1	12	0.513514	0.0810811	0.540541	0.517241
BL	12	0.514286	0.0227273	0.571429	0.567568			PD1	11	0.588235	0.210526	0.647059	0.611111			PostD1	12	0.552632	0.131579	0.578947	0.540541
BL	12	0.5	0.0909091	0.590909	0.641026			PD1	11	0.578947	0.125	0.578947	0.529412			PostD1	12	0.529412	0.0588235	0.5	0.545455
BL	12	0.575	0.1	0.525	0.575			PD1	12	0.540541	0.135135	0.675676	0.540541			PostD1	12	0.588235	0.0882353	0.529412	0.545455
BL	12	0.521739	0	0.565217	0.52381			PD1	12	0.540541	0.108108	0.621622	0.5			PostD1	14	0.533333	0.166667	0.6	0.551724
BL	12	0.590909	0.0869565	0.590909	0.52381			PD1	12	0.555556	0.0277778	0.555556	0.558824			PostD1	14	0.541667	0.166667	0.708333	0.52
BL	12	0.533333	0.0333333	0.533333	0.545455			PD1	12	0.516129	0.0277778	0.548387	0.535714			PostD1	14	0.538462	0.0714286	0.576923	0.566667
BL	12	0.513514	0.135135	0.594595	0.515152			PD1	12	0.53125	0.129032	0.625	0.529412			PostD1	14	0.642857	0	0.535714	0.576923
BL	12	0.513514	0.135135	0.675676	0.540541			PD1	12	0.514286	0.114286	0.628571	0.540541			PostD1	14	0.5	0.0294118	0.529412	0.515152
BL	12	0.541667	0	0.541667	0.521739			PD1	12	0.645161	0.131579	0.516129	0.5			PostD1	14	0.548387	0.129032	0.580645	0.533333
BL	12	0.565217	0.0416667	0.565217	0.541667			PD1	12	0.5	0.15	0.578947	0.525			PostD1	14	0.529412	0.147059	0.647059	0.514286
BL	12	0.565217	0	0.565217	0.565217			PD1	12	0.575	0.0588235	0.625	0.5			PostD1	14	0.529412	0.117647	0.647059	0.529412
BL	12	0.538462	0	0.538462	0.518519			PD1	12	0.558824	0.135135	0.529412	0.542857			PostD1	14	0.535714	0.0714286	0.571429	0.533333
BL	14	0.521739	0	0.608696	0.55			PD1	14	0.592593	0.259259	0.740741	0.535714			PostD1	14	0.533333	0.0666667	0.566667	0.5
BL	14	0.52	0.130435	0.56	0.583333			PD1	14	0.6	0.266667	0.766667	0.517241			PostD1	14	0.5	0.119048	0.690476	0.521739
BL	14	0.565217	0.16	0.652174	0.5			PD1	14	0.533333	0.2	0.7	0.53125			PostD1	14	0.545455	0.0606061	0.606061	0.5
BL	14	0.625	0	0.6875	0.642857			PD1	14	0.52381	0.0952381	0.619048	0.521739			PostD1	14	0.540541	0.027027	0.594595	0.552632
BL	14	0.526316	0.125	0.578947	0.526316			PD1	14	0.571429	0	0.619048	0.565217			PostD1	14	0.542857	0.142857	0.685714	0.59375
BL	14	0.52381	0.105263	0.619048	0.526316			PD1	14	0.521739	0.391304	0.695652	0.571429			PostD1	15	0.518519	0.111111	0.666667	0.517241
BL	14	0.558824	0.0294118	0.529412	0.586207			PD1	14	0.541667	0.130435	0.583333	0.608696			PostD1	15	0.533333	0.0333333	0.5	0.548387
BL	14	0.538462	0.117647	0.576923	0.6			PD1	14	0.518519	0.166667	0.62963	0.517241			PostD1	15	0.529412	0.0588235	0.558824	0.515152
BL	14	0.583333	0.192308	0.625	0.5			PD1	14	0.7	0.037037	0.6	0.564103			PostD1	15	0.575758	0.0606061	0.515152	0.5
BL	14	0.615385	0	0.807692	0.526316			PD1	14	0.548387	0.193548	0.645161	0.583333			PostD1	15	0.555556	0	0.555556	0.5
BL	14	0.541667	0.269231	0.708333	0.517241			PD1	14	0.585366	0.195122	0.609756	0.594595			PostD1	15	0.540541	0.111111	0.648649	0.514286
BL	14	0.565217	0.0833333	0.521739	0.565217			PD1	14	0.631579	0.210526	0.763158	0.586957			PostD1	15	0.542857	0.162162	0.657143	0.567568
BL	14	0.56	0.04	0.56	0.565217			PD1	14	0.558824	0.147059	0.794118	0.555556			PostD1	15	0.586207	0.0571429	0.62069	0.59375
BL	14	0.608696	0.217391	0.695652	0.52381			PD1	14	0.589744	0.121212	0.564103	0.514286			PostD1	15	0.535714	0.0714286	0.607143	0.5
BL	14	0.542857	0.0285714	0.571429	0.538462			PD1	14	0.515152	0.0952381	0.606061	0.5			PostD1	15	0.535714	0.0357143	0.607143	0.533333
BL	15	0.55	0	0.7	0.55			PD1	15	0.5	0.0333333	0.566667	0.5			PostD1	15	0.5	0.184211	0.552632	0.6
BL	15	0.566667	0.05	0.6	0.52			PD1	15	0.5	0.125	0.5625	0.517241			PostD1	15	0.607143	0.0357143	0.571429	0.53125
BL	15	0.56	0.2	0.64	0.517241			PD1	15	0.518519	0.037037	0.62963	0.533333			PostD1	16	0.571429	0.107143	0.535714	0.586207
BL	15	0.5	0	0.590909	0.55			PD1	15	0.5	0	0.583333	0.545455			PostD1	16	0.5	0.153846	0.576923	0.56
BL	15	0.545455	0.0909091	0.545455	0.521739			PD1	15	0.521739	0.0833333	0.565217	0.521739			PostD1	16	0.52	0.12	0.6	0.538462
BL	15	0.517241	0.0689655	0.62069	0.551724			PD1	15	0.578947	0.26087	0.578947	0.55			PostD1	16	0.517241	0.0344828	0.517241	0.566667
BL	15	0.548387	0.225806	0.612903	0.538462			PD1	15	0.666667	0	0.611111	0.611111			PostD1	16	0.5	0.133333	0.566667	0.535714
BL	15	0.628571	0.0285714	0.542857	0.580645			PD1	15	0.545455	0.181818	0.590909	0.625			PostD1	16	0.555556	0.148148	0.555556	0.56
BL	15	0.518519	0.296296	0.703704	0.607143			PD1	15	0.590909	0.227273	0.590909	0.619048			PostD1	16	0.56	0.04	0.56	0.52
BL	15	0.608696	0.26087	0.73913	0.56			PD1	15	0.6	0.15	0.6	0.590909			PostD1	16	0.538462	0.0769231	0.5	0.56
BL	15	0.625	0.25	0.666667	0.583333			PD1	15	0.576923	0.192308	0.538462	0.666667			PostD1	16	0.518519	0.148148	0.555556	0.56
BL	15	0.517241	0.0689655	0.551724	0.517241			PD1	15	0.52	0	0.52	0.571429
BL	15	0.516129	0.129032	0.548387	0.551724			PD1	15	0.619048	0.16	0.619048	0.571429
BL	15	0.586207	0	0.724138	0.636364			PD1	15	0.545455	0	0.5	0.55
BL	16	0.535714	0.142857	0.571429	0.571429			PD1	15	0.6	0.0909091	0.52	0.714286
BL	16	0.5	0.178571	0.642857	0.518519			PD1	16	0.535714	0.178571	0.678571	0.538462
BL	16	0.608696	0.130435	0.565217	0.545455			PD1	16	0.5	0.0909091	0.681818	0.52
BL	16	0.52381	0.047619	0.619048	0.521739			PD1	16	0.619048	0.142857	0.714286	0.5
BL	16	0.52	0.08	0.52	0.56			PD1	16	0.541667	0.125	0.583333	0.541667
BL	16	0.52	0.12	0.52	0.583333			PD1	16	0.545455	0.136364	0.636364	0.5
BL	16	0.631579	0	0.684211	0.625			PD1	16	0.52	0.12	0.68	0.538462
BL	16	0.6	0.157895	0.6	0.55			PD1	16	0.518519	0.148148	0.666667	0.538462
BL	16	0.521739	0	0.521739	0.5			PD1	16	0.548387	0.185185	0.645161	0.571429
BL	16	0.608696	0.0434783	0.565217	0.545455			PD1	16	0.518519	0.217391	0.518519	0.625
BL	16	0.545455	0.227273	0.590909	0.6			PD1	16	0.608696	0.192308	0.695652	0.521739
BL	16	0.52	0.16	0.68	0.5			PD1	16	0.538462	0.125	0.653846	0.5
BL	16	0.583333	0.208333	0.708333	0.555556			PD1	16	0.541667	0.192308	0.583333	0.576923
BL	16	0.583333	0.0833333	0.625	0.518519			PD1	16	0.5	0.15	0.538462	0.625
								PD1	16	0.55	0.238095	0.6	0.590909
								PD1	16	0.52381	0.0769231	0.619048	0.578947
	Average	0.548093	0.083074	0.60359	0.547312				Average	0.548559	0.1055	0.598776	0.549992				Average	0.550933	0.0726855	0.583178	0.538418
	St. Deviation	0.0368501	0.0713769	0.0704239	0.0342644				St. Deviation	0.0369981	0.0758722	0.071349	0.0427908				St. Deviation	0.0413099	0.0509834	0.0872125	0.0298203
	Total Number Steps	166	166	166	166				Total Number Steps	168	168	168	168				Total Number Steps	149	149	149	149
	# of steps outside 2 S.D.	5	10	5	9				# of steps outside 2 S.D.	7	8	7	14				# of steps outside 2 S.D.	7	0	6	3

## Sheet: Pre-Injury Dox Phase Data
Time point	Animal ID	Hindlimb Phase	Heterolateral Phase	Homolateral Phase	Forelimb Phase			Time point	Animal ID	Hindlimb Phase	Heterolateral Phase	Homolateral Phase	Forelimb Phase
D1D5	1	0.62069	0	0.551724	0.551724			D1D8	1	0.833333	0.166667	0.611111	0.578947
D1D5	1	0.53125	0	0.65625	0.65625			D1D8	1	0.761905	0.190476	0.52381	0.65
D1D5	1	0.514286	0.0285714	0.514286	0.578947			D1D8	1	0.761905	0.142857	0.52381	0.75
D1D5	1	0.52	0	0.64	0.625			D1D8	1	0.666667	0.047619	0.52381	0.565217
D1D5	1	0.607143	0.04	0.535714	0.575758			D1D8	1	0.652174	0.130435	0.521739	0.571429
D1D5	1	0.703704	0.148148	0.555556	0.592593			D1D8	1	0.62963	0	0.518519	0.909091
D1D5	1	0.714286	0	0.571429	0.64			D1D8	1	0.64	0.08	0.52	0.517241
D1D5	1	0.75	0.166667	0.5	0.68			D1D8	1	0.592593	0.111111	0.518519	0.541667
D1D5	1	0.575758	0.151515	0.515152	0.5			D1D8	1	0.608696	0	0.608696	0.625
D1D5	1	0.65	0	0.55	0.608696			D1D8	1	0.666667	0.0416667	0.541667	0.615385
D1D5	1	0.615385	0.115385	0.538462	0.541667			D1D8	1	0.7	0.05	0.5	0.513514
D1D5	1	0.652174	0.0434783	0.521739	0.592593			D1D8	1	0.789474	0.210526	0.578947	0.521739
D1D5	1	0.548387	0.0645161	0.516129	0.535714			D1D8	1	0.684211	0	0.526316	0.608696
D1D5	1	0.516129	0.0322581	0.548387	0.516129			D1D8	1	0.736842	0.157895	0.578947	0.590909
D1D5	1	0.708333	0.0322581	0.541667	1			D1D8	1	0.8	0.25	0.55	0.619048
D1D5	3	0.514286	0.0857143	0.571429	0.515152			D1D8	3	0.521739	0	0.521739	0.521739
D1D5	3	0.5	0.09375	0.5625	0.53125			D1D8	3	0.676923	0.115385	0.5	0.565217
D1D5	3	0.56	0.04	0.52	0.56			D1D8	3	0.529412	0.0882353	0.558824	0.533333
D1D5	3	0.586207	0	0.551724	0.535714			D1D8	3	0.551724	0.0294118	0.517241	0.53125
D1D5	3	0.53125	0.0344828	0.59375	0.518519			D1D8	3	0.5	0.030303	0.53125	0.529412
D1D5	3	0.517241	0.0344828	0.551724	0.516129			D1D8	3	0.606061	0	0.575758	0.606061
D1D5	3	0.566667	0.1	0.533333	0.518519			D1D8	3	0.517241	0.142857	0.62069	0.666667
D1D5	3	0.535714	0	0.5	0.518519			D1D8	3	0.678571	0.1	0.535714	0.576923
D1D5	3	0.615385	0.0357143	0.5	0.538462			D1D8	3	0.517241	0.0333333	0.517241	0.545455
D1D5	3	0.518519	0.037037	0.518519	0.52			D1D8	3	0.666667	0	0.5	0.538462
D1D5	3	0.52	0.037037	0.52	0.5			D1D8	3	0.538462	0	0.641026	0.65
D1D5	3	0.529412	0	0.5	0.514286			D1D8	3	0.555556	0.0384615	0.529412	0.527778
D1D5	3	0.53125	0	0.53125	0.5			D1D8	4	0.583333	0	0.625	0.590909
D1D5	3	0.533333	0.0625	0.533333	0.5			D1D8	4	0.5	0.0833333	0.571429	0.5
D1D5	3	0.5	0	0.53125	0.516129			D1D8	4	0.558824	0.0714286	0.588235	0.551724
D1D5	4	0.526316	0.131579	0.631579	0.558824			D1D8	4	0.521739	0	0.521739	0.5
D1D5	4	0.5625	0.0555556	0.59375	0.513514			D1D8	4	0.542857	0.0689655	0.628571	0.578947
D1D5	4	0.5	0.0277778	0.527778	0.515152			D1D8	4	0.551724	0.0344828	0.517241	0.518519
D1D5	4	0.533333	0.0333333	0.5	0.533333			D1D8	4	0.586207	0	0.517241	0.533333
D1D5	4	0.512821	0.0769231	0.512821	0.515152			D1D8	4	0.814815	0.0555556	0.555556	0.529412
D1D5	4	0.630435	0.0769231	0.695652	0.604651			D1D8	4	0.576923	0.027027	0.567568	0.526316
D1D5	4	0.540541	0.162162	0.567568	0.53125			D1D8	4	0.527778	0.0357143	0.514286	0.514286
D1D5	4	0.567568	0.0540541	0.513514	0.585366			D1D8	4	0.708333	0.0833333	0.805556	0.515152
D1D5	4	0.538462	0	0.538462	0.5			D1D8	4	0.714286	0.212121	0.606061	0.764706
D1D5	4	0.566667	0.0666667	0.533333	0.5			D1D8	6	0.526316	0	0.6	0.578947
D1D5	4	0.529412	0.0588235	0.5	0.558824			D1D8	6	0.566667	0.05	0.571429	0.526316
D1D5	4	0.580645	0.0645161	0.548387	0.516129			D1D8	6	0.578947	0	0.541667	0.52381
D1D5	4	0.538462	0	0.5	0.5			D1D8	6	0.565217	0.125	0.619048	0.55
D1D5	4	0.575758	0	0.545455	0.516129			D1D8	6	0.615385	0.0384615	0.538462	0.541667
D1D5	6	0.538462	0	0.538462	0.5			D1D8	6	0.545455	0.0384615	0.545455	0.5
D1D5	6	0.541667	0.0769231	0.583333	0.5			D1D8	6	0.548387	0	0.6	0.555556
D1D5	6	0.551724	0	0.517241	0.5			D1D8	6	0.515152	0.1	0.666667	0.566667
D1D5	6	0.548387	0.0322581	0.516129	0.5			D1D8	6	0.529412	0.1	0.727273	0.586207
D1D5	6	0.555556	0	0.555556	0.535714			D1D8	6	1	0.294118	1	0.6
D1D5	6	0.518519	0.037037	0.592593	0.583333			D1D8	6	0.678571	0.178571	0.535714	0.52381
D1D5	6	0.565217	0	0.608696	0.625			D1D8	6	0.666667	0.285714	0.714286	0.608696
D1D5	6	0.576923	0.0384615	0.5	0.5			D1D8	6	0.636364	0.05	0.5	0.55
D1D5	6	0.576923	0	0.538462	0.538462			D1D8	6	0.52381	0.0454545	0.545455	0.551724
D1D5	6	0.5	0	0.571429	0.52			D1D8	6	0.6	0.130435	0.565217	0.541667
D1D5	6	0.5	0	0.5	0.521739			D1D8	7	0.72	0.0322581	0.516129	0.652174
D1D5	6	0.52	0.0416667	0.52	0.541667			D1D8	7	0.53125	0.0606061	0.545455	0.529412
D1D5	6	0.590909	0.08	0.545455	0.521739			D1D8	7	0.533333	0.1	0.533333	0.535714
D1D5	6	0.571429	0.047619	0.571429	0.5			D1D8	7	0.708333	0	0.575758	0.518519
D1D5	7	0.636364	0	0.606061	0.566667			D1D8	7	0.705882	0.181818	0.516129	0.647059
D1D5	7	0.545455	0.0909091	0.515152	0.527778			D1D8	7	0.653846	0.148148	0.555556	0.571429
D1D5	7	0.558824	0	0.558824	0.558824			D1D8	7	0.78125	0.3125	0.5	0.769231
D1D5	7	0.545455	0	0.575758	0.533333			D1D8	7	0.793103	0.241379	0.62069	0.65625
D1D5	7	0.567568	0	0.594595	0.545455			D1D8	7	0.666667	0.133333	0.592593	0.580645
D1D5	7	0.575758	0.108108	0.575758	0.529412			D1D8	7	0.5	0.133333	0.5	0.5
D1D5	7	0.548387	0.0645161	0.548387	0.516129			D1D8	7	0.517241	0.137931	0.517241	0.52381
D1D5	7	0.545455	0.0606061	0.545455	0.533333			D1D8	7	0.6	0.137931	0.68	0.538462
D1D5	7	0.585366	0.030303	0.512195	0.585366			D1D8	7	0.666667	0.0689655	0.517241	0.541667
D1D5	7	0.567568	0.0731707	0.540541	0.514286			D1D8	8	0.619048	0.0952381	0.52381	0.6
D1D5	7	0.53125	0.0810811	0.5	0.555556			D1D8	8	0.541667	0	0.5	0.5
D1D5	7	0.540541	0.0810811	0.513514	0.551724			D1D8	8	0.571429	0.142857	0.52381	0.6
D1D5	7	0.5	0	0.566667	0.548387			D1D8	8	0.65	0.1	0.5	0.565217
D1D5	7	0.551724	0.0333333	0.551724	0.527778			D1D8	8	0.913043	0.0434783	0.521739	0.909091
D1D5	8	0.551724	0.137931	0.551724	0.538462			D1D8	8	0.916667	0.04	0.56	1
D1D5	8	0.576923	0.0769231	0.576923	0.535714			D1D8	8	1	0.470588	0.647059	0.863636
D1D5	8	0.535714	0.0357143	0.535714	0.518519			D1D8	8	0.56	0.04	0.56	0.52
D1D5	8	0.5	0.0357143	0.535714	0.518519			D1D8	8	0.65	0	0.5	0.590909
D1D5	8	0.52	0	0.52	0.5			D1D8	8	0.545455	0	0.5	0.5
D1D5	8	0.56	0.04	0.52	0.5			D1D8	8	0.6	0.04	0.52	0.576923
D1D5	8	0.541667	0.0416667	0.541667	0.52			D1D8	8	0.608696	0.0869565	0.521739	0.625
D1D5	8	0.545455	0.0454545	0.5	0.545455			D1D8	9	0.941176	0.235294	0.705882	0.681818
D1D5	8	0.521739	0	0.521739	0.5			D1D8	9	0.782609	0.217391	0.521739	0.625
D1D5	8	0.590909	0.0454545	0.545455	0.571429			D1D8	9	0.5	0	0.538462	0.52
D1D5	8	0.541667	0	0.5	0.545455			D1D8	9	0.535714	0.0384615	0.571429	0.518519
D1D5	9	0.566667	0.166667	0.7	0.571429			D1D8	9	0.947368	0.315789	0.578947	0.866667
D1D5	9	0.538462	0.0217391	0.589744	0.522727			D1D8	9	0.947368	0.421053	0.578947	1
D1D5	9	0.521739	0.130435	0.543478	0.615385			D1D8	9	1	0.368421	0.526316	0.833333
D1D5	9	0.565217	0	0.608696	0.625			D1D8	9	0.954545	0.454545	0.545455	0.85
D1D5	9	0.551724	0.0344828	0.517241	0.518519			D1D8	9	0.5	0.0454545	0.5	0.526316
D1D5	9	0.516129	0	0.645161	0.56			D1D8	9	0.571429	0.0909091	0.619048	0.526316
D1D5	9	0.592593	0.193548	0.555556	0.529412			D1D8	9	0.95	0	0.55	0.785714
D1D5	9	0.52	0	0.6	0.615385			D1D8	9	0.95	0.3	0.55	0.944444
D1D5	9	0.555556	0.037037	0.518519	0.538462			D1D8	9	1	0.470588	1	0.666667
D1D5	9	0.551724	0.0689655	0.689655	0.545455			D1D8	9	0.842105	0.263158	0.736842	0.608696
D1D5	9	0.548387	0.0967742	0.612903	0.515152			D1D8	9	0.8	0.2	0.6	0.619048
D1D5	9	0.518519	0.037037	0.555556	0.517241			D1D8	11	0.52381	0.0952381	0.571429	0.52381
D1D5	9	0.571429	0.166667	0.619048	0.5			D1D8	11	0.592593	0.37037	0.703704	0.526316
D1D5	9	0.5	0.0681818	0.590909	0.520833			D1D8	11	0.6	0.12	0.64	0.565217
D1D5	9	0.525	0.025	0.575	0.52381			D1D8	11	0.517241	0.0689655	0.517241	0.566667
D1D5	11	0.5	0.0769231	0.615385	0.538462			D1D8	11	0.6	0.04	0.6	0.518519
D1D5	11	0.607143	0	0.607143	0.592593			D1D8	11	0.56	0.08	0.56	0.5
D1D5	11	0.517241	0.0357143	0.586207	0.535714			D1D8	11	0.733333	0	0.571429	0.516129
D1D5	11	0.517241	0.0689655	0.551724	0.518519			D1D8	11	0.535714	0.114286	0.72	0.633333
D1D5	11	0.538462	0.103448	0.538462	0.535714			D1D8	11	0.62963	0.0333333	0.633333	0.666667
D1D5	11	0.548387	0.0384615	0.580645	0.5625			D1D8	11	0.555556	0.0357143	0.571429	0.5
D1D5	11	0.533333	0.0666667	0.533333	0.533333			D1D8	11	0.714286	0.0384615	0.5	0.538462
D1D5	11	0.590909	0	0.545455	0.5			D1D8	11	0.666667	0.0454545	0.590909	0.52
D1D5	11	0.538462	0.153846	0.538462	0.545455			D1D8	11	0.666667	0.2	0.56	0.571429
D1D5	11	0.615385	0.153846	0.538462	0.583333			D1D8	11	0.636364	0.125	0.583333	0.592593
D1D5	11	0.571429	0	0.571429	0.52			D1D8	11	0.6	0.047619	0.571429	0.551724
D1D5	11	0.566667	0.107143	0.6	0.535714			D1D8	12	0.571429	0.107143	0.535714	0.555556
D1D5	11	0.727273	0.181818	0.545455	0.736842			D1D8	12	0.542857	0.0857143	0.514286	0.571429
D1D5	12	0.529412	0	0.558824	0.53125			D1D8	12	0.548387	0.0967742	0.612903	0.516129
D1D5	12	0.5	0.0588235	0.529412	0.529412			D1D8	12	0.615385	0	0.615385	0.615385
D1D5	12	0.542857	0.0857143	0.571429	0.514286			D1D8	12	0.5	0	0.5	0.517241
D1D5	12	0.5625	0.09375	0.5625	0.53125			D1D8	12	0.533333	0	0.533333	0.571429
D1D5	12	0.542857	0.121212	0.6	0.575			D1D8	12	0.703704	0.111111	0.666667	0.5
D1D5	12	0.536585	0	0.634146	0.613636			D1D8	12	0.857143	0	0.571429	0.6
D1D5	12	0.545455	0.0833333	0.606061	0.516129			D1D8	12	0.857143	0.285714	0.619048	0.636364
D1D5	12	0.555556	0.0526316	0.611111	0.575758			D1D8	12	0.551724	0.103448	0.517241	0.571429
D1D5	12	0.574468	0	0.574468	0.576923			D1D8	12	0.555556	0.0740741	0.555556	0.535714
D1D5	12	0.526316	0	0.5	0.527778			D1D8	12	0.636364	0.227273	0.590909	0.6
D1D5	12	0.567568	0.190476	0.567568	0.567568			D1D8	12	0.818182	0.318182	0.590909	0.7
D1D5	12	0.547619	0.0857143	0.5	0.617647			D1D8	14	0.5	0.12	0.56	0.541667
D1D5	14	0.5	0.0714286	0.642857	0.571429			D1D8	14	0.56	0.230769	0.615385	0.565217
D1D5	14	0.5	0.0666667	0.566667	0.5			D1D8	14	0.565217	0.0833333	0.625	0.5
D1D5	14	0.576923	0.115385	0.615385	0.551724			D1D8	14	0.56	0.0833333	0.541667	0.541667
D1D5	14	0.5	0	0.535714	0.535714			D1D8	14	0.56	0.115385	0.538462	0.56
D1D5	14	0.5	0	0.571429	0.555556			D1D8	14	0.516129	0.0344828	0.551724	0.548387
D1D5	14	0.5	0.0357143	0.5625	0.535714			D1D8	14	0.518519	0.0588235	0.558824	0.518519
D1D5	14	0.558824	0.117647	0.529412	0.621622			D1D8	14	0.526316	0.0357143	0.535714	0.5
D1D5	14	0.53125	0.1875	0.5625	0.6			D1D8	14	0.535714	0.04	0.6	0.5
D1D5	14	0.571429	0	0.571429	0.555556			D1D8	14	0.551724	0.137931	0.551724	0.538462
D1D5	14	0.551724	0.0357143	0.551724	0.533333			D1D8	14	0.727273	0.103448	0.551724	0.518519
D1D5	14	0.6	0	0.8	0.772727			D1D8	14	0.518519	0.0357143	0.535714	0.5
D1D5	14	0.5	0.12	0.59375	0.529412			D1D8	14	0.7	0	0.538462	0.625
D1D5	14	0.555556	0.03125	0.527778	0.529412			D1D8	14	0.65069	0.1875	0.625	0.533333
D1D5	14	0.575758	0.0606061	0.69697	0.636364			D1D8	15	0.64	0.08	0.6	0.535714
D1D5	14	0.55	0.025	0.6	0.560976			D1D8	15	0.518519	0.222222	0.666667	0.521739
D1D5	15	0.580645	0.0666667	0.612903	0.538462			D1D8	15	0.727273	0	0.681818	0.681818
D1D5	15	0.666667	0.0333333	0.533333	0.555556			D1D8	15	0.62963	0	0.555556	0.538462
D1D5	15	0.53125	0.03125	0.5625	0.535714			D1D8	15	0.642857	0.107143	0.535714	0.538462
D1D5	15	0.52381	0.09375	0.761905	0.675			D1D8	15	0.576923	0.0384615	0.538462	0.541667
D1D5	15	0.586207	0.0344828	0.517241	0.518519			D1D8	15	0.636364	0	1	1
D1D5	15	0.5625	0.0208333	0.583333	0.595745			D1D8	15	0.514286	0.0285714	0.514286	0.586207
D1D5	15	0.5625	0	0.5625	0.575758			D1D8	15	0.535714	0.142857	0.678571	0.5625
D1D5	15	0.533333	0.0333333	0.566667	0.571429			D1D8	15	0.571429	0.107143	0.571429	0.518519
D1D5	15	1	0	0.733333	0.592593			D1D8	15	0.555556	0.037037	0.592593	0.517241
D1D5	15	0.88	0.48	0.809524	0.53125			D1D8	15	0.68	0	0.64	0.933333
D1D5	15	0.857143	0.107143	0.535714	0.555556			D1D8	15	0.72	0.08	0.6	0.608696
D1D5	15	0.5	0.0666667	0.666667	0.580645			D1D8	16	0.875	0	0.608696	0.529412
D1D5	15	0.52	0	0.52	0.5			D1D8	16	0.941176	0.26087	0.555556	0.736842
D1D5	15	0.538462	0.04	0.576923	0.521739			D1D8	16	0.5	0.0909091	0.545455	0.52381
D1D5	16	0.5625	0.15625	0.53125	0.586207			D1D8	16	0.68	0.28	0.72	0.541667
D1D5	16	0.565217	0.130435	0.608696	0.52381			D1D8	16	0.592593	0.111111	0.555556	0.612903
D1D5	16	0.538462	0.192308	0.653846	0.5			D1D8	16	0.6	0.2	0.6	0.545455
D1D5	16	0.52	0.08	0.56	0.52			D1D8	16	0.622857	0.178571	0.642857	0.535714
D1D5	16	0.533333	0.1	0.533333	0.551724			D1D8	16	0.75	0.0740741	0.518519	0.555556
D1D5	16	0.652174	0.130435	0.565217	0.6			D1D8	16	0.516129	0.0344828	0.655172	0.6
D1D5	16	0.5	0.125	0.625	0.5			D1D8	16	0.5	0.0714286	0.571429	0.518519
D1D5	16	0.535714	0.0357143	0.5	0.535714			D1D8	16	0.5	0	0.608696	0.571429
D1D5	16	0.516129	0.129032	0.612903	0.535714			D1D8	16	0.56	0.0869565	0.636364	0.565217
D1D5	16	0.566667	0	0.533333	0.538462
D1D5	16	0.555556	0.133333	0.592593	0.555556
D1D5	16	0.52	0.08	0.56	0.52
D1D5	16	0.571429	0.178571	0.607143	0.52
D1D5	16	0.533333	0.0333333	0.566667	0.5
	Average	0.560613	0.0591058	0.565095	0.549877				Average	0.642498	0.104074	0.579476	0.590555
	St. Deviation	0.0661677	0.0621865	0.0548705	0.0565372				St. Deviation	0.130154	0.103666	0.0819836	0.106751
	Total Number Steps	166	166	166	166				Total Number Steps	161	161	161	161
	# of steps outside 2 S.D.	14	1	3	12				# of steps outside 2 S.D.	72	21	4	35

## Sheet: Pre-Injury Cont. Spatiotemporal
Time point	Animal ID	Swing Time	Stance Time	Stride Time	Stride Frequency	Stride Distance	Speed		Time point	Animal ID	Swing Time	Stance Time	Stride Time	Stride Frequency	Stride Distance	Speed		Time point	Animal ID	Swing Time	Stance Time	Stride Time	Stride Frequency	Stride Distance	Speed
BL	1	0.12	0.1	0.22	4.54545	17.8628	127.591		PD1	1	0.11	0.15	0.26	3.84615	17.193	66.127		PostD1	1	0.13	0.11	0.24	4.16667	17.502	72.9249
BL	1	0.13	0.11	0.24	4.16667	19.3735	88.0612		PD1	1	0.11	0.14	0.25	4	18.4509	73.8037		PostD1	1	0.12	0.11	0.23	4.34783	18.908	82.2086
BL	1	0.14	0.16	0.3	3.33333	15.8396	72.7711		PD1	1	0.11	0.15	0.26	3.84615	17.1086	65.8024		PostD1	1	0.12	0.13	0.25	4	17.8483	71.3933
BL	1	0.14	0.13	0.27	3.7037	15.6359	52.7985		PD1	1	0.11	0.11	0.22	4.54545	17.2072	78.2145		PostD1	1	0.15	0.23	0.38	2.63158	14.0332	36.9294
BL	1	0.12	0.18	0.3	3.33333	14.938	57.9106		PD1	1	0.1	0.16	0.26	3.84615	11.9269	39.7565		PostD1	1	0.14	0.19	0.33	3.0303	14.8666	45.0503
BL	1	0.1	0.12	0.22	4.54545	17.5196	49.7932		PD1	1	0.08	0.22	0.3	3.33333	18.0995	67.035		PostD1	1	0.12	0.19	0.31	3.22581	13.5486	43.7053
BL	1	0.1	0.21	0.31	3.22581	14.868	79.6346		PD1	1	0.12	0.12	0.24	4.16667	16.4231	68.4294		PostD1	1	0.12	0.2	0.32	3.125	17.3032	54.0726
BL	1	0.11	0.18	0.29	3.44828	15.2442	47.9614		PD1	1	0.1	0.21	0.31	3.22581	13.5605	43.7436		PostD1	1	0.12	0.12	0.24	4.16667	14.609	60.8709
BL	1	0.1	0.3	0.4	2.5	11.0818	52.5663		PD1	1	0.08	0.11	0.19	5.26316	17.0121	89.5372		PostD1	1	0.11	0.14	0.25	4	15.0082	60.0329
BL	1	0.11	0.19	0.3	3.33333	16.1821	27.7045		PD1	1	0.1	0.11	0.21	4.7619	18.9002	90.0009		PostD1	1	0.12	0.16	0.28	3.57143	16.5976	59.2773
BL	1	0.13	0.13	0.26	3.84615	16.0368	53.9402		PD1	1	0.1	0.13	0.23	4.34783	10.5181	45.7307		PostD1	1	0.11	0.14	0.25	4	16.0058	61.5608
BL	1	0.13	0.11	0.24	4.16667	18.1594	61.6799		PD1	1	0.11	0.18	0.29	3.44828	10.3208	35.589		PostD1	1	0.12	0.15	0.27	3.7037	14.9084	57.34
BL	1	0.12	0.08	0.2	5	17.6444	75.6641		PD1	1	0.09	0.11	0.2	5	20.5513	102.756		PostD1	3	0.14	0.15	0.29	3.44828	22.3674	77.1289
BL	1	0.12	0.15	0.27	3.7037	15.1717	88.2222		PD1	3	0.15	0.22	0.37	2.7027	16.4034	44.3335		PostD1	3	0.15	0.14	0.29	3.44828	21.5563	74.3319
BL	3	0.13	0.16	0.29	3.44828	16.0009	55.1756		PD1	3	0.14	0.26	0.4	2.5	15.6208	39.0521		PostD1	3	0.15	0.23	0.38	2.63158	16.2222	42.6901
BL	3	0.12	0.22	0.34	2.94118	16.1809	47.5908		PD1	3	0.14	0.13	0.27	3.7037	19.5523	72.4158		PostD1	3	0.16	0.18	0.34	2.94118	18.1637	53.4226
BL	3	0.12	0.12	0.24	4.16667	20.9402	83.7607		PD1	3	0.12	0.13	0.25	4	22.3161	89.2643		PostD1	3	0.14	0.13	0.27	3.7037	22.6534	83.9016
BL	3	0.14	0.16	0.3	3.33333	20.5284	68.428		PD1	3	0.13	0.12	0.25	4	21.1343	84.5373		PostD1	3	0.16	0.12	0.28	3.57143	20.9598	74.8565
BL	3	0.13	0.16	0.29	3.44828	17.6114	60.7291		PD1	3	0.14	0.11	0.25	4	22.2218	88.887		PostD1	3	0.16	0.14	0.3	3.33333	19.5107	65.0358
BL	3	0.15	0.14	0.29	3.44828	10.7563	37.0907		PD1	3	0.12	0.12	0.24	4.16667	22.3597	93.1655		PostD1	3	0.15	0.16	0.31	3.22581	20.7567	66.9572
BL	3	0.17	0.24	0.41	2.43902	17.8334	43.496		PD1	3	0.12	0.17	0.29	3.44828	17.369	59.893		PostD1	3	0.13	0.14	0.27	3.7037	20.8087	77.0691
BL	3	0.11	0.2	0.31	3.22581	14.0944	45.4659		PD1	3	0.12	0.16	0.28	3.57143	15.1719	54.1855		PostD1	3	0.16	0.18	0.34	2.94118	18.6248	54.7788
BL	3	0.21	0.2	0.41	2.43902	16.0876	39.238		PD1	3	0.1	0.26	0.36	2.77778	12.5208	34.7801		PostD1	4	0.17	0.19	0.36	2.77778	15.8667	44.0743
BL	3	0.13	0.21	0.34	2.94118	12.8849	37.8967		PD1	3	0.12	0.1	0.22	4.54545	25.2347	114.703		PostD1	4	0.13	0.23	0.36	2.77778	16.4836	45.7876
BL	3	0.13	0.28	0.41	2.43902	17.496	42.6732		PD1	3	0.11	0.09	0.2	5	25.3795	126.897		PostD1	4	0.14	0.15	0.29	3.44828	17.8717	61.6267
BL	3	0.12	0.15	0.27	3.7037	20.8703	77.2975		PD1	3	0.13	0.1	0.23	4.34783	22.029	95.7781		PostD1	4	0.12	0.15	0.27	3.7037	18.2633	67.6417
BL	3	0.11	0.13	0.24	4.16667	21.0086	87.5359		PD1	3	0.14	0.15	0.29	3.44828	18.5854	64.0875		PostD1	4	0.15	0.17	0.32	3.125	18.6316	58.2237
BL	3	0.11	0.15	0.26	3.84615	19.4146	74.6715		PD1	4	0.12	0.26	0.38	2.63158	14.9003	39.2113		PostD1	4	0.12	0.14	0.26	3.84615	16.9419	65.1611
BL	4	0.1	0.08	0.18	5.55556	13.803	60.3398		PD1	4	0.11	0.25	0.36	2.77778	16.2247	45.0687		PostD1	4	0.14	0.14	0.28	3.57143	18.4622	65.9365
BL	4	0.11	0.16	0.27	3.7037	16.2917	68.5093		PD1	4	0.1	0.14	0.24	4.16667	18.5185	77.1604		PostD1	4	0.12	0.16	0.28	3.57143	16.8926	60.3306
BL	4	0.11	0.11	0.22	4.54545	18.7794	85.3608		PD1	4	0.12	0.13	0.25	4	20.4827	81.931		PostD1	4	0.13	0.13	0.26	3.84615	19.0957	73.4449
BL	4	0.1	0.18	0.28	3.57143	15.9253	56.876		PD1	4	0.12	0.14	0.26	3.84615	18.1633	69.8589		PostD1	4	0.13	0.16	0.29	3.44828	15.7519	54.3171
BL	4	0.11	0.14	0.25	4	14.8075	59.2302		PD1	4	0.12	0.15	0.27	3.7037	20.2353	74.9455		PostD1	4	0.12	0.17	0.29	3.44828	15.2279	52.51
BL	4	0.12	0.1	0.22	4.54545	20.4181	92.8093		PD1	4	0.12	0.14	0.26	3.84615	18.3962	70.7545		PostD1	4	0.14	0.16	0.3	3.33333	17.0887	56.9624
BL	4	0.1	0.08	0.18	5.55556	20.5194	113.997		PD1	4	0.12	0.13	0.25	4	21.5157	86.0629		PostD1	4	0.16	0.16	0.32	3.125	17.2361	53.8629
BL	4	0.12	0.11	0.23	4.34783	20.5701	89.435		PD1	4	0.11	0.11	0.22	4.54545	19.3414	87.9155		PostD1	4	0.12	0.14	0.26	3.84615	18.3145	70.4403
BL	4	0.09	0.14	0.23	4.34783	18.2631	79.4046		PD1	4	0.12	0.11	0.23	4.34783	21.1314	91.8758		PostD1	4	0.14	0.14	0.28	3.57143	16.0139	57.1926
BL	4	0.12	0.14	0.26	3.84615	17.878	68.7616		PD1	4	0.12	0.18	0.3	3.33333	16.9498	56.4994		PostD1	6	0.13	0.17	0.3	3.33333	20.8728	69.5761
BL	4	0.12	0.17	0.29	3.44828	16.9265	58.3672		PD1	4	0.13	0.16	0.29	3.44828	18.7369	64.6101		PostD1	6	0.12	0.13	0.25	4	18.3589	73.4357
BL	4	0.11	0.16	0.27	3.7037	19.363	71.7148		PD1	4	0.11	0.16	0.27	3.7037	16.2744	60.2756		PostD1	6	0.1	0.1	0.2	5	19.241	96.2049
BL	4	0.12	0.15	0.27	3.7037	15.8388	58.6622		PD1	4	0.14	0.17	0.31	3.22581	18.929	61.0613		PostD1	6	0.1	0.11	0.21	4.7619	20.1946	96.1647
BL	4	0.11	0.15	0.26	3.84615	13.9545	53.6713		PD1	6	0.07	0.32	0.39	2.5641	9.70822	24.8929		PostD1	6	0.13	0.11	0.24	4.16667	21.2114	88.381
BL	4	0.13	0.16	0.29	3.44828	18.3229	63.1825		PD1	6	0.07	0.24	0.31	3.22581	10.4227	33.6216		PostD1	6	0.13	0.1	0.23	4.34783	19.2743	83.8013
BL	6	0.11	0.15	0.26	3.84615	15.1732	58.3585		PD1	6	0.11	0.26	0.37	2.7027	10.9115	29.4906		PostD1	6	0.11	0.13	0.24	4.16667	18.1624	75.6766
BL	6	0.11	0.18	0.29	3.44828	13.6832	47.1833		PD1	6	0.08	0.27	0.35	2.85714	12.1964	34.8467		PostD1	6	0.14	0.13	0.27	3.7037	21.5759	79.9108
BL	6	0.11	0.14	0.25	4	12.8639	51.4556		PD1	6	0.1	0.13	0.23	4.34783	17.5563	76.3317		PostD1	6	0.11	0.15	0.26	3.84615	19.0819	73.392
BL	6	0.11	0.19	0.3	3.33333	14.1655	47.2183		PD1	6	0.13	0.11	0.24	4.16667	19.4871	81.1963		PostD1	6	0.12	0.12	0.24	4.16667	20.6038	85.8492
BL	6	0.1	0.16	0.26	3.84615	14.3095	55.0366		PD1	6	0.1	0.16	0.26	3.84615	14.3657	55.2525		PostD1	6	0.12	0.09	0.21	4.7619	21.1562	100.744
BL	6	0.1	0.1	0.2	5	16.9106	84.553		PD1	6	0.1	0.14	0.24	4.16667	18.0217	75.0906		PostD1	6	0.16	0.14	0.3	3.33333	22.7139	75.7129
BL	6	0.11	0.11	0.22	4.54545	18.8612	85.7325		PD1	6	0.11	0.13	0.24	4.16667	13.1295	54.7061		PostD1	6	0.13	0.12	0.25	4	19.8376	79.3504
BL	6	0.11	0.13	0.24	4.16667	16.1262	67.1925		PD1	6	0.09	0.16	0.25	4	15.7255	62.9019		PostD1	6	0.11	0.11	0.22	4.54545	19.7349	89.7042
BL	6	0.11	0.13	0.24	4.16667	16.0759	64.3037		PD1	6	0.09	0.08	0.17	5.88235	18.2553	107.384		PostD1	7	0.16	0.17	0.33	3.0303	22.0403	66.7888
BL	6	0.08	0.12	0.2	5	16.8003	84.0015		PD1	6	0.11	0.13	0.24	4.16667	16.5746	69.061		PostD1	7	0.15	0.15	0.3	3.33333	23.9872	79.9572
BL	6	0.09	0.1	0.19	5.26316	18.9911	99.9532		PD1	6	0.11	0.11	0.22	4.54545	19.3206	87.8211		PostD1	7	0.17	0.15	0.32	3.125	25.8157	80.674
BL	6	0.1	0.1	0.2	5	16.4945	82.4726		PD1	6	0.06	0.18	0.24	4.16667	12.0846	50.3527		PostD1	7	0.17	0.17	0.34	2.94118	22.5142	66.2181
BL	6	0.11	0.08	0.19	5.26316	18.0864	95.1914		PD1	6	0.1	0.09	0.19	5.26316	19.1838	100.967		PostD1	7	0.17	0.16	0.33	3.0303	21.0473	63.7796
BL	6	0.1	0.09	0.19	5.26316	18.8589	99.2575		PD1	7	0.12	0.14	0.26	3.84615	14.9071	57.3351		PostD1	7	0.18	0.15	0.33	3.0303	23.6011	71.5184
BL	6	0.11	0.07	0.18	5.55556	20.2866	112.703		PD1	7	0.11	0.16	0.27	3.7037	16.9699	62.8515		PostD1	7	0.16	0.15	0.31	3.22581	22.5666	72.7954
BL	7	0.14	0.1	0.24	4.16667	19.3644	80.6852		PD1	7	0.12	0.18	0.3	3.33333	14.802	49.3402		PostD1	7	0.15	0.13	0.28	3.57143	20.0222	71.5078
BL	7	0.13	0.12	0.25	4	20.3555	81.4221		PD1	7	0.12	0.26	0.38	2.63158	11.2067	29.4912		PostD1	7	0.16	0.14	0.3	3.33333	23.6424	78.8078
BL	7	0.14	0.11	0.25	4	23.3295	93.3179		PD1	7	0.16	0.22	0.38	2.63158	17.7058	46.5943		PostD1	7	0.15	0.17	0.32	3.125	21.4006	66.8768
BL	7	0.14	0.11	0.25	4	21.5075	86.0299		PD1	7	0.13	0.14	0.27	3.7037	15.4763	57.3197		PostD1	7	0.16	0.18	0.34	2.94118	19.8235	58.3044
BL	7	0.12	0.1	0.22	4.54545	23.5816	107.189		PD1	7	0.14	0.2	0.34	2.94118	20.8746	61.3959		PostD1	8	0.11	0.1	0.21	4.7619	21.4627	102.203
BL	7	0.13	0.1	0.23	4.34783	22.2139	96.5821		PD1	7	0.15	0.13	0.28	3.57143	18.5522	66.2578		PostD1	8	0.11	0.09	0.2	5	23.7753	118.876
BL	7	0.12	0.11	0.23	4.34783	21.0505	91.5237		PD1	7	0.13	0.16	0.29	3.44828	22.4914	77.5564		PostD1	8	0.13	0.1	0.23	4.34783	24.4694	106.389
BL	7	0.15	0.12	0.27	3.7037	18.8436	69.7912		PD1	7	0.13	0.12	0.25	4	20.8594	83.4375		PostD1	8	0.1	0.09	0.19	5.26316	21.6844	114.128
BL	7	0.15	0.18	0.33	3.0303	19.9972	60.5976		PD1	7	0.13	0.12	0.25	4	23.2551	93.0206		PostD1	8	0.11	0.1	0.21	4.7619	23.7032	112.872
BL	7	0.13	0.13	0.26	3.84615	24.5897	94.5758		PD1	7	0.12	0.11	0.23	4.34783	19.4549	84.5865		PostD1	8	0.11	0.1	0.21	4.7619	24.1137	114.827
BL	7	0.14	0.19	0.33	3.0303	22.3976	67.8716		PD1	7	0.12	0.11	0.23	4.34783	21.7196	94.4331		PostD1	8	0.11	0.09	0.2	5	21.2878	106.439
BL	8	0.11	0.11	0.22	4.54545	16.8637	67.8941		PD1	7	0.12	0.11	0.23	4.34783	26.8457	116.721		PostD1	8	0.11	0.09	0.2	5	22.4503	112.252
BL	8	0.1	0.14	0.24	4.16667	18.0239	70.2656		PD1	8	0.1	0.15	0.25	4	18.2007	72.8028		PostD1	8	0.13	0.08	0.21	4.7619	23.2211	110.577
BL	8	0.11	0.08	0.19	5.26316	19.7627	104.014		PD1	8	0.09	0.2	0.29	3.44828	18.173	62.6656		PostD1	8	0.13	0.09	0.22	4.54545	22.7388	103.358
BL	8	0.11	0.1	0.21	4.7619	20.7805	98.9547		PD1	8	0.09	0.22	0.31	3.22581	13.5688	43.7703		PostD1	9	0.13	0.18	0.31	3.22581	16.87	54.4195
BL	8	0.12	0.08	0.2	5	19.0423	95.2115		PD1	8	0.11	0.11	0.22	4.54545	22.3716	101.689		PostD1	9	0.12	0.17	0.29	3.44828	17.0367	58.7472
BL	8	0.11	0.1	0.21	4.7619	21.2011	100.958		PD1	8	0.1	0.1	0.2	5	19.9125	99.5627		PostD1	9	0.13	0.12	0.25	4	20.3853	81.5411
BL	8	0.1	0.09	0.19	5.26316	21.5189	113.257		PD1	8	0.09	0.09	0.18	5.55556	24.1149	133.972		PostD1	9	0.14	0.17	0.31	3.22581	16.821	54.2612
BL	8	0.1	0.1	0.2	5	19.5335	97.6675		PD1	8	0.11	0.1	0.21	4.7619	18.5848	88.4992		PostD1	9	0.14	0.17	0.31	3.22581	16.4324	53.0077
BL	8	0.1	0.08	0.18	5.55556	19.8139	110.077		PD1	8	0.1	0.11	0.21	4.7619	19.3859	92.314		PostD1	9	0.11	0.13	0.24	4.16667	16.7241	69.6839
BL	8	0.11	0.08	0.19	5.26316	22.045	116.026		PD1	8	0.11	0.1	0.21	4.7619	22.8075	108.607		PostD1	9	0.15	0.14	0.29	3.44828	19.5192	67.3075
BL	8	0.09	0.1	0.19	5.26316	18.9181	99.5688		PD1	8	0.12	0.1	0.22	4.54545	21.4636	97.562		PostD1	9	0.13	0.26	0.39	2.5641	13.0674	33.5061
BL	8	0.1	0.11	0.21	4.7619	19.6967	93.7938		PD1	8	0.11	0.1	0.21	4.7619	19.8735	94.6359		PostD1	9	0.12	0.24	0.36	2.77778	14.3539	39.8718
BL	9	0.11	0.1	0.21	4.7619	14.5641	69.3529		PD1	8	0.11	0.09	0.2	5	23.4433	117.217		PostD1	9	0.11	0.19	0.3	3.33333	11.5723	38.5742
BL	9	0.1	0.13	0.23	4.34783	16.0702	69.8705		PD1	8	0.09	0.11	0.2	5	19.8518	99.2589		PostD1	9	0.12	0.25	0.37	2.7027	15.6058	42.1778
BL	9	0.12	0.11	0.23	4.34783	17.067	74.2043		PD1	9	0.08	0.21	0.29	3.44828	12.7473	43.9562		PostD1	9	0.14	0.18	0.32	3.125	17.309	54.0907
BL	9	0.12	0.13	0.25	4	17.9203	71.6812		PD1	9	0.09	0.19	0.28	3.57143	15.1039	53.9426		PostD1	9	0.16	0.17	0.33	3.0303	20.7758	62.9569
BL	9	0.11	0.1	0.21	4.7619	18.9423	90.2014		PD1	9	0.11	0.17	0.28	3.57143	14.9726	53.4737		PostD1	9	0.13	0.15	0.28	3.57143	18.8507	67.324
BL	9	0.1	0.1	0.2	5	17.3787	86.8933		PD1	9	0.1	0.12	0.22	4.54545	12.6609	57.5495		PostD1	11	0.13	0.34	0.47	2.12766	14.0128	29.8146
BL	9	0.11	0.1	0.21	4.7619	19.0786	90.8506		PD1	9	0.12	0.13	0.25	4	18.1346	72.5385		PostD1	11	0.13	0.36	0.49	2.04082	10.489	21.4061
BL	9	0.13	0.18	0.31	3.22581	12.1424	39.1691		PD1	9	0.1	0.1	0.2	5	17.2481	86.2405		PostD1	11	0.19	0.21	0.4	2.5	13.7951	34.4877
BL	9	0.13	0.19	0.32	3.125	13.7141	42.8567		PD1	9	0.09	0.1	0.19	5.26316	18.3581	96.6213		PostD1	11	0.14	0.15	0.29	3.44828	17.4651	60.2246
BL	9	0.1	0.18	0.28	3.57143	13.5585	48.4234		PD1	9	0.11	0.08	0.19	5.26316	18.5867	97.8248		PostD1	11	0.14	0.16	0.3	3.33333	19.7508	65.8361
BL	9	0.09	0.14	0.23	4.34783	12.1437	52.7987		PD1	9	0.11	0.11	0.22	4.54545	16.1599	73.454		PostD1	11	0.12	0.15	0.27	3.7037	17.5269	64.9146
BL	9	0.1	0.1	0.2	5	16.2817	81.4083		PD1	9	0.09	0.08	0.17	5.88235	19.5653	115.09		PostD1	11	0.14	0.14	0.28	3.57143	18.5915	66.3983
BL	9	0.11	0.1	0.21	4.7619	16.8747	80.3558		PD1	9	0.08	0.1	0.18	5.55556	15.6588	86.9936		PostD1	11	0.15	0.14	0.29	3.44828	16.8933	58.2527
BL	9	0.1	0.12	0.22	4.54545	17.7455	80.6613		PD1	9	0.09	0.1	0.19	5.26316	15.554	81.8634		PostD1	11	0.15	0.15	0.3	3.33333	19.4588	64.8626
BL	11	0.1	0.12	0.22	4.54545	15.7689	71.6766		PD1	9	0.1	0.11	0.21	4.7619	17.8603	85.0492		PostD1	11	0.14	0.18	0.32	3.125	16.471	51.4719
BL	11	0.1	0.12	0.22	4.54545	18.1787	82.6303		PD1	9	0.1	0.11	0.21	4.7619	14.2917	68.0557		PostD1	11	0.15	0.17	0.32	3.125	18.1795	56.8111
BL	11	0.11	0.13	0.24	4.16667	17.8358	74.316		PD1	9	0.09	0.16	0.25	4	13.7968	55.1873		PostD1	11	0.12	0.19	0.31	3.22581	15.8676	51.1856
BL	11	0.1	0.08	0.18	5.55556	20.1243	111.802		PD1	11	0.1	0.08	0.18	5.55556	21.6424	120.236		PostD1	11	0.11	0.16	0.27	3.7037	16.1645	59.8683
BL	11	0.09	0.12	0.21	4.7619	20.4731	97.4908		PD1	11	0.1	0.08	0.18	5.55556	19.4897	108.276		PostD1	11	0.16	0.21	0.37	2.7027	18.4455	49.8527
BL	11	0.1	0.11	0.21	4.7619	19.7216	93.9124		PD1	11	0.09	0.09	0.18	5.55556	14.2786	79.3255		PostD1	12	0.14	0.15	0.29	3.44828	18.8713	65.0735
BL	11	0.13	0.09	0.22	4.54545	20.2947	92.2486		PD1	11	0.08	0.12	0.2	5	16.7512	83.756		PostD1	12	0.14	0.15	0.29	3.44828	19.4575	67.0947
BL	11	0.11	0.15	0.26	3.84615	16.8282	64.724		PD1	11	0.08	0.09	0.17	5.88235	17.5573	103.278		PostD1	12	0.18	0.19	0.37	2.7027	19.8708	53.7048
BL	11	0.09	0.08	0.17	5.88235	21.0622	123.895		PD1	11	0.08	0.14	0.22	4.54545	17.4945	79.5203		PostD1	12	0.15	0.16	0.31	3.22581	18.813	60.6872
BL	11	0.09	0.1	0.19	5.26316	21.4414	112.85		PD1	11	0.1	0.12	0.22	4.54545	16.6469	75.6677		PostD1	12	0.16	0.19	0.35	2.85714	15.7065	44.8758
BL	11	0.09	0.1	0.19	5.26316	19.1483	100.781		PD1	11	0.12	0.17	0.29	3.44828	12.9432	44.6319		PostD1	12	0.18	0.21	0.39	2.5641	18.5221	47.4925
BL	11	0.11	0.1	0.21	4.7619	20.0076	95.2744		PD1	11	0.13	0.13	0.26	3.84615	18.3237	70.4757		PostD1	12	0.15	0.16	0.31	3.22581	17.5917	56.7475
BL	11	0.08	0.13	0.21	4.7619	16.1001	76.6673		PD1	11	0.09	0.11	0.2	5	18.0449	90.2245		PostD1	12	0.16	0.24	0.4	2.5	17.4063	43.5158
BL	11	0.09	0.12	0.21	4.7619	20.4166	97.2218		PD1	11	0.09	0.08	0.17	5.88235	19.6041	115.318		PostD1	12	0.2	0.21	0.41	2.43902	19.887	48.505
BL	12	0.15	0.13	0.28	3.57143	16.64	59.4287		PD1	11	0.09	0.11	0.2	5	20.0835	100.418		PostD1	12	0.18	0.28	0.46	2.17391	17.7965	38.688
BL	12	0.13	0.21	0.34	2.94118	18.2178	53.5816		PD1	11	0.08	0.09	0.17	5.88235	18.2609	107.417		PostD1	12	0.14	0.23	0.37	2.7027	14.8862	40.233
BL	12	0.19	0.16	0.35	2.85714	14.8865	42.5329		PD1	11	0.08	0.09	0.17	5.88235	16.9127	99.4866		PostD1	12	0.19	0.19	0.38	2.63158	17.7582	46.732
BL	12	0.13	0.31	0.44	2.27273	13.947	31.6978		PD1	11	0.1	0.09	0.19	5.26316	19.2749	101.447		PostD1	12	0.17	0.17	0.34	2.94118	20.2832	59.6565
BL	12	0.15	0.25	0.4	2.5	13.9514	34.8786		PD1	12	0.14	0.23	0.37	2.7027	14.2208	38.4345		PostD1	12	0.18	0.16	0.34	2.94118	19.5192	57.4094
BL	12	0.13	0.1	0.23	4.34783	22.3378	97.121		PD1	12	0.14	0.23	0.37	2.7027	16.4181	44.3732		PostD1	14	0.14	0.16	0.3	3.33333	18.7462	62.4873
BL	12	0.13	0.09	0.22	4.54545	21.6616	98.4618		PD1	12	0.15	0.21	0.36	2.77778	20.0063	55.5731		PostD1	14	0.12	0.12	0.24	4.16667	17.5012	72.9219
BL	12	0.14	0.16	0.3	3.33333	17.3765	57.9218		PD1	12	0.15	0.16	0.31	3.22581	19.6695	63.4499		PostD1	14	0.13	0.13	0.26	3.84615	18.0654	69.4822
BL	12	0.16	0.21	0.37	2.7027	15.3581	41.5084		PD1	12	0.12	0.2	0.32	3.125	15.9219	49.7559		PostD1	14	0.14	0.14	0.28	3.57143	19.9972	71.4185
BL	12	0.12	0.25	0.37	2.7027	11.482	31.0325		PD1	12	0.13	0.22	0.35	2.85714	17.3006	49.4302		PostD1	14	0.17	0.17	0.34	2.94118	18.8317	55.3873
BL	12	0.15	0.09	0.24	4.16667	19.5353	81.397		PD1	12	0.13	0.18	0.31	3.22581	18.0773	58.3139		PostD1	14	0.13	0.18	0.31	3.22581	16.449	53.0614
BL	12	0.13	0.1	0.23	4.34783	20.3181	88.3394		PD1	12	0.16	0.22	0.38	2.63158	17.5266	46.1226		PostD1	14	0.15	0.19	0.34	2.94118	16.0636	47.2459
BL	12	0.14	0.09	0.23	4.34783	18.5824	80.7931		PD1	12	0.14	0.26	0.4	2.5	15.1075	37.7689		PostD1	14	0.13	0.21	0.34	2.94118	15.5629	45.7732
BL	12	0.14	0.12	0.26	3.84615	19.8014	76.1593		PD1	12	0.15	0.19	0.34	2.94118	18.8972	55.58		PostD1	14	0.14	0.14	0.28	3.57143	17.5622	62.7221
BL	14	0.11	0.12	0.23	4.34783	17.4279	75.7734		PD1	14	0.11	0.17	0.28	3.57143	14.8177	54.8804		PostD1	14	0.16	0.14	0.3	3.33333	18.3886	61.2955
BL	14	0.13	0.12	0.25	4	18.8053	75.2212		PD1	14	0.13	0.19	0.32	3.125	14.4225	48.0749		PostD1	14	0.14	0.28	0.42	2.38095	11.5757	27.5612
BL	14	0.1	0.13	0.23	4.34783	16.7542	72.8443		PD1	14	0.11	0.16	0.27	3.7037	13.9944	46.648		PostD1	14	0.14	0.19	0.33	3.0303	14.1821	42.976
BL	14	0.1	0.06	0.16	6.25	19.3734	121.084		PD1	14	0.1	0.11	0.21	4.7619	18.1768	86.556		PostD1	14	0.15	0.22	0.37	2.7027	14.4014	38.9226
BL	14	0.1	0.09	0.19	5.26316	19.2564	101.35		PD1	14	0.1	0.11	0.21	4.7619	18.9594	90.2827		PostD1	14	0.16	0.19	0.35	2.85714	12.1362	34.6749
BL	14	0.11	0.1	0.21	4.7619	16.4632	78.3964		PD1	14	0.09	0.14	0.23	4.34783	16.2458	70.6339		PostD1	15	0.12	0.15	0.27	3.7037	18.4176	68.2133
BL	14	0.11	0.23	0.34	2.94118	16.4737	48.452		PD1	14	0.11	0.13	0.24	4.16667	17.5777	73.2404		PostD1	15	0.16	0.14	0.3	3.33333	19.1883	63.961
BL	14	0.12	0.14	0.26	3.84615	17.1735	66.0518		PD1	14	0.1	0.17	0.27	3.7037	16.9143	62.6454		PostD1	15	0.18	0.16	0.34	2.94118	18.314	53.8648
BL	14	0.1	0.14	0.24	4.16667	14.0167	58.4029		PD1	14	0.08	0.12	0.2	5	16.4297	82.1486		PostD1	15	0.16	0.17	0.33	3.0303	21.0549	63.8028
BL	14	0.12	0.14	0.26	3.84615	10.7482	41.3392		PD1	14	0.13	0.18	0.31	3.22581	16.8556	54.3729		PostD1	15	0.17	0.19	0.36	2.77778	18.3798	51.0549
BL	14	0.12	0.12	0.24	4.16667	14.1648	59.0199		PD1	14	0.14	0.27	0.41	2.43902	10.3763	25.308		PostD1	15	0.2	0.17	0.37	2.7027	15.0752	40.7437
BL	14	0.1	0.13	0.23	4.34783	18.0806	78.6114		PD1	14	0.14	0.24	0.38	2.63158	10.9331	28.7714		PostD1	15	0.14	0.21	0.35	2.85714	15.2629	43.6083
BL	14	0.12	0.13	0.25	4	17.6	70.4001		PD1	14	0.12	0.22	0.34	2.94118	10.2049	30.0144		PostD1	15	0.13	0.16	0.29	3.44828	15.3731	53.0105
BL	14	0.11	0.12	0.23	4.34783	17.0827	74.2727		PD1	14	0.13	0.26	0.39	2.5641	14.5423	37.2878		PostD1	15	0.13	0.15	0.28	3.57143	18.6884	66.7444
BL	14	0.17	0.18	0.35	2.85714	15.5687	44.4821		PD1	14	0.1	0.23	0.33	3.0303	13.6751	41.4397		PostD1	15	0.13	0.15	0.28	3.57143	17.7085	63.2446
BL	15	0.09	0.11	0.2	5	15.4899	77.4497		PD1	15	0.11	0.19	0.3	3.33333	15.196	50.6534		PostD1	15	0.17	0.21	0.38	2.63158	16.2783	42.8376
BL	15	0.13	0.17	0.3	3.33333	18.5341	61.7803		PD1	15	0.13	0.19	0.32	3.125	18.784	58.6999		PostD1	15	0.16	0.12	0.28	3.57143	19.4422	69.4364
BL	15	0.12	0.13	0.25	4	15.214	60.8558		PD1	15	0.09	0.18	0.27	3.7037	15.4725	57.3056		PostD1	16	0.13	0.15	0.28	3.57143	20.2504	72.3227
BL	15	0.12	0.1	0.22	4.54545	18.5552	84.3416		PD1	15	0.11	0.13	0.24	4.16667	18.8809	78.6705		PostD1	16	0.13	0.13	0.26	3.84615	19.3801	74.5389
BL	15	0.11	0.11	0.22	4.54545	20.9385	95.1752		PD1	15	0.11	0.12	0.23	4.34783	19.4863	84.7231		PostD1	16	0.12	0.13	0.25	4	19.0005	76.002
BL	15	0.14	0.15	0.29	3.44828	16.4717	56.799		PD1	15	0.1	0.09	0.19	5.26316	20.7609	109.268		PostD1	16	0.13	0.16	0.29	3.44828	20.4724	70.5946
BL	15	0.17	0.14	0.31	3.22581	15.6484	50.4787		PD1	15	0.09	0.09	0.18	5.55556	18.4964	102.758		PostD1	16	0.14	0.16	0.3	3.33333	19.0905	63.6349
BL	15	0.1	0.25	0.35	2.85714	16.4026	46.8647		PD1	15	0.09	0.13	0.22	4.54545	13.8168	62.8036		PostD1	16	0.13	0.14	0.27	3.7037	19.8975	73.6945
BL	15	0.12	0.15	0.27	3.7037	15.229	56.4039		PD1	15	0.1	0.12	0.22	4.54545	16.0197	72.8168		PostD1	16	0.13	0.12	0.25	4	19.3245	77.2981
BL	15	0.12	0.11	0.23	4.34783	16.8678	73.3381		PD1	15	0.09	0.11	0.2	5	17.285	86.4248		PostD1	16	0.13	0.13	0.26	3.84615	20.8155	80.0597
BL	15	0.1	0.14	0.24	4.16667	13.8459	57.6912		PD1	15	0.09	0.17	0.26	3.84615	13.6487	52.4949		PostD1	16	0.13	0.14	0.27	3.7037	20.3801	75.4819
BL	15	0.14	0.15	0.29	3.44828	16.5303	57.0012		PD1	15	0.12	0.13	0.25	4	18.6312	74.525
BL	15	0.15	0.16	0.31	3.22581	16.392	52.8773		PD1	15	0.09	0.12	0.21	4.7619	15.0416	71.6265
BL	15	0.09	0.2	0.29	3.44828	11.7576	40.5435		PD1	15	0.11	0.11	0.22	4.54545	19.0536	86.6072
BL	16	0.13	0.15	0.28	3.57143	17.0506	60.8949		PD1	15	0.13	0.12	0.25	4	19.5634	78.2536
BL	16	0.14	0.14	0.28	3.57143	17.165	61.3034		PD1	16	0.11	0.17	0.28	3.57143	16.622	59.3644
BL	16	0.13	0.1	0.23	4.34783	21.6678	94.2076		PD1	16	0.08	0.14	0.22	4.54545	16.3421	74.2824
BL	16	0.1	0.11	0.21	4.7619	19.6843	93.7348		PD1	16	0.09	0.12	0.21	4.7619	14.7367	70.1748
BL	16	0.12	0.13	0.25	4	20.7884	83.1538		PD1	16	0.09	0.15	0.24	4.16667	17.7549	73.9786
BL	16	0.13	0.12	0.25	4	20.2751	81.1004		PD1	16	0.1	0.12	0.22	4.54545	18.2456	82.9345
BL	16	0.11	0.08	0.19	5.26316	21.8552	115.027		PD1	16	0.1	0.15	0.25	4	17.3756	69.5023
BL	16	0.11	0.09	0.2	5	23.1894	115.947		PD1	16	0.12	0.15	0.27	3.7037	17.0574	63.1757
BL	16	0.1	0.13	0.23	4.34783	19.165	83.326		PD1	16	0.11	0.2	0.31	3.22581	12.1638	39.2382
BL	16	0.11	0.12	0.23	4.34783	20.0272	87.0746		PD1	16	0.09	0.18	0.27	3.7037	16.4573	60.9531
BL	16	0.13	0.09	0.22	4.54545	22.1937	100.881		PD1	16	0.08	0.15	0.23	4.34783	11.5294	50.1277
BL	16	0.12	0.13	0.25	4	16.3392	65.3569		PD1	16	0.09	0.17	0.26	3.84615	13.8707	53.3487
BL	16	0.11	0.13	0.24	4.16667	18.2114	75.8806		PD1	16	0.09	0.15	0.24	4.16667	16.4002	68.334
BL	16	0.09	0.15	0.24	4.16667	18.3513	76.4636		PD1	16	0.09	0.17	0.26	3.84615	15.3043	58.8625
									PD1	16	0.08	0.12	0.2	5	15.9758	79.8791
									PD1	16	0.09	0.12	0.21	4.7619	14.6226	69.6313

## Sheet: Pre-injury Dox Spatiotemporal
Time point	Animal ID	Swing Time	Stance Time	Stride Time	Stride Frequency	Stride Distance	Speed		Time point	Animal ID	Swing Time	Stance Time	Stride Time	Stride Frequency	Stride Distance	Speed
D1D5	1	0.12	0.17	0.29	3.44828	18.8116	64.8676		D1D8	1	0.1	0.08	0.18	5.55556	18.5869	103.26
D1D5	1	0.15	0.17	0.32	3.125	16.6268	51.9588		D1D8	1	0.11	0.1	0.21	4.7619	20.0968	95.6989
D1D5	1	0.12	0.23	0.35	2.85714	16.8246	48.0702		D1D8	1	0.11	0.1	0.21	4.7619	17.2265	82.0308
D1D5	1	0.13	0.12	0.25	4	14.9492	59.7968		D1D8	1	0.11	0.1	0.21	4.7619	17.8418	84.9609
D1D5	1	0.13	0.15	0.28	3.57143	15.8363	56.5582		D1D8	1	0.12	0.11	0.23	4.34783	19.5926	85.1851
D1D5	1	0.12	0.15	0.27	3.7037	18.6788	69.1806		D1D8	1	0.13	0.14	0.27	3.7037	17.743	65.7148
D1D5	1	0.11	0.1	0.21	4.7619	16.326	77.7426		D1D8	1	0.14	0.11	0.25	4	17.2774	69.1097
D1D5	1	0.12	0.12	0.24	4.16667	16.9408	70.5865		D1D8	1	0.14	0.13	0.27	3.7037	17.2547	63.9063
D1D5	1	0.18	0.15	0.33	3.0303	18.988	57.5395		D1D8	1	0.12	0.11	0.23	4.34783	15.7744	68.5842
D1D5	1	0.12	0.08	0.2	5	18.9426	94.7128		D1D8	1	0.12	0.12	0.24	4.16667	16.6648	69.4366
D1D5	1	0.14	0.12	0.26	3.84615	20.5386	78.9945		D1D8	1	0.11	0.09	0.2	5	17.931	89.655
D1D5	1	0.13	0.1	0.23	4.34783	18.2276	79.2503		D1D8	1	0.09	0.1	0.19	5.26316	17.7829	93.5941
D1D5	1	0.16	0.15	0.31	3.22581	16.9409	54.6482		D1D8	1	0.11	0.08	0.19	5.26316	17.3765	91.4552
D1D5	1	0.16	0.15	0.31	3.22581	17.3508	55.9702		D1D8	1	0.1	0.09	0.19	5.26316	18.7406	98.6346
D1D5	1	0.1	0.14	0.24	4.16667	14.6228	60.9282		D1D8	1	0.11	0.09	0.2	5	17.5275	87.6374
D1D5	3	0.16	0.19	0.35	2.85714	19.8136	56.6104		D1D8	3	0.14	0.09	0.23	4.34783	25.8877	112.555
D1D5	3	0.16	0.16	0.32	3.125	21.8019	68.131		D1D8	3	0.13	0.13	0.26	3.84615	24.4881	94.1851
D1D5	3	0.15	0.1	0.25	4	23.8101	95.2403		D1D8	3	0.15	0.19	0.34	2.94118	21.6486	63.6724
D1D5	3	0.19	0.1	0.29	3.44828	23.0293	79.4113		D1D8	3	0.14	0.15	0.29	3.44828	20.4186	70.4088
D1D5	3	0.19	0.13	0.32	3.125	19.9082	62.213		D1D8	3	0.16	0.16	0.32	3.125	18.149	56.7156
D1D5	3	0.15	0.14	0.29	3.44828	23.5284	81.1326		D1D8	3	0.17	0.16	0.33	3.0303	17.4029	52.7362
D1D5	3	0.16	0.14	0.3	3.33333	24.024	80.0801		D1D8	3	0.15	0.14	0.29	3.44828	15.3312	52.8663
D1D5	3	0.15	0.13	0.28	3.57143	22.8024	81.4373		D1D8	3	0.14	0.14	0.28	3.57143	18.5854	66.3764
D1D5	3	0.15	0.11	0.26	3.84615	25.6106	98.5025		D1D8	3	0.16	0.13	0.29	3.44828	17.9911	62.0382
D1D5	3	0.15	0.12	0.27	3.7037	24.2739	89.9033		D1D8	3	0.17	0.13	0.3	3.33333	22.8391	76.1302
D1D5	3	0.14	0.11	0.25	4	23.5327	94.131		D1D8	3	0.18	0.21	0.39	2.5641	15.6813	40.2085
D1D5	3	0.15	0.19	0.34	2.94118	21.4206	63.0019		D1D8	3	0.17	0.17	0.34	2.94118	19.9712	58.7388
D1D5	3	0.17	0.15	0.32	3.125	23.3429	72.9467		D1D8	4	0.15	0.09	0.24	4.16667	18.397	76.6543
D1D5	3	0.15	0.15	0.3	3.33333	21.8118	72.7059		D1D8	4	0.15	0.13	0.28	3.57143	19.5394	69.7837
D1D5	3	0.16	0.16	0.32	3.125	21.8464	68.27		D1D8	4	0.17	0.17	0.34	2.94118	16.2448	47.7789
D1D5	4	0.17	0.21	0.38	2.63158	17.5588	46.2073		D1D8	4	0.13	0.1	0.23	4.34783	20.9623	91.1405
D1D5	4	0.15	0.17	0.32	3.125	17.4391	54.4971		D1D8	4	0.11	0.24	0.35	2.85714	13.9777	39.9363
D1D5	4	0.18	0.18	0.36	2.77778	20.5256	57.0156		D1D8	4	0.15	0.14	0.29	3.44828	19.0883	65.8216
D1D5	4	0.15	0.15	0.3	3.33333	20.2829	67.6097		D1D8	4	0.14	0.15	0.29	3.44828	18.3156	63.1573
D1D5	4	0.19	0.2	0.39	2.5641	20.7445	53.1911		D1D8	4	0.14	0.22	0.36	2.77778	14.2394	39.5539
D1D5	4	0.24	0.22	0.46	2.17391	15.9754	34.7292		D1D8	4	0.14	0.23	0.37	2.7027	15.3526	41.4936
D1D5	4	0.19	0.18	0.37	2.7027	18.9157	51.1236		D1D8	4	0.15	0.2	0.35	2.85714	16.5951	47.4145
D1D5	4	0.16	0.21	0.37	2.7027	18.1981	49.1841		D1D8	4	0.09	0.19	0.28	3.57143	13.3123	47.544
D1D5	4	0.12	0.14	0.26	3.84615	19.0098	73.1146		D1D8	4	0.09	0.27	0.36	2.77778	12.1579	33.7719
D1D5	4	0.15	0.15	0.3	3.33333	17.1974	57.3247		D1D8	6	0.11	0.09	0.2	5	20.8409	104.204
D1D5	4	0.15	0.19	0.34	2.94118	17.5637	51.6578		D1D8	6	0.12	0.09	0.21	4.7619	23.6149	112.452
D1D5	4	0.16	0.15	0.31	3.22581	18.2422	58.8459		D1D8	6	0.14	0.1	0.24	4.16667	22.3825	93.2602
D1D5	4	0.13	0.13	0.26	3.84615	19.3236	74.3215		D1D8	6	0.11	0.1	0.21	4.7619	18.804	89.5427
D1D5	4	0.19	0.14	0.33	3.0303	19.1896	58.1504		D1D8	6	0.12	0.14	0.26	3.84615	19.312	74.277
D1D5	6	0.13	0.13	0.26	3.84615	21.7302	83.5776		D1D8	6	0.11	0.11	0.22	4.54545	20.344	92.4728
D1D5	6	0.12	0.12	0.24	4.16667	21.0926	87.886		D1D8	6	0.11	0.19	0.3	3.33333	13.4636	44.8786
D1D5	6	0.13	0.16	0.29	3.44828	20.7271	71.4729		D1D8	6	0.11	0.19	0.3	3.33333	14.3058	47.6859
D1D5	6	0.15	0.16	0.31	3.22581	20.9939	67.7222		D1D8	6	0.11	0.22	0.33	3.0303	12.6385	38.2983
D1D5	6	0.13	0.14	0.27	3.7037	21.2062	78.5414		D1D8	6	0.11	0.06	0.17	5.88235	12.373	72.7822
D1D5	6	0.14	0.13	0.27	3.7037	20.8117	77.0803		D1D8	6	0.11	0.17	0.28	3.57143	17.8557	63.7705
D1D5	6	0.13	0.1	0.23	4.34783	19.4451	84.5438		D1D8	6	0.11	0.1	0.21	4.7619	15.6427	74.4889
D1D5	6	0.14	0.12	0.26	3.84615	22.6279	87.0304		D1D8	6	0.11	0.09	0.2	5	22.1008	110.504
D1D5	6	0.13	0.13	0.26	3.84615	19.061	73.3114		D1D8	6	0.11	0.11	0.22	4.54545	19.9804	90.8199
D1D5	6	0.14	0.14	0.28	3.57143	22.1768	79.203		D1D8	6	0.11	0.12	0.23	4.34783	21.9315	95.3545
D1D5	6	0.11	0.13	0.24	4.16667	22.3184	92.9935		D1D8	7	0.17	0.14	0.31	3.22581	26.1398	84.3219
D1D5	6	0.12	0.13	0.25	4	22.662	90.6479		D1D8	7	0.15	0.18	0.33	3.0303	21.8915	66.3379
D1D5	6	0.12	0.1	0.22	4.54545	21.2665	96.6659		D1D8	7	0.16	0.14	0.3	3.33333	22.9451	76.4838
D1D5	6	0.1	0.11	0.21	4.7619	22.067	105.081		D1D8	7	0.18	0.15	0.33	3.0303	19.2868	58.4447
D1D5	7	0.18	0.15	0.33	3.0303	19.8676	60.2048		D1D8	7	0.14	0.17	0.31	3.22581	19.3068	62.28
D1D5	7	0.16	0.17	0.33	3.0303	22.4006	67.8806		D1D8	7	0.16	0.11	0.27	3.7037	24.2674	89.8792
D1D5	7	0.17	0.17	0.34	2.94118	25.4301	74.7945		D1D8	7	0.16	0.16	0.32	3.125	18.2633	57.0727
D1D5	7	0.16	0.17	0.33	3.0303	20.636	62.5333		D1D8	7	0.13	0.16	0.29	3.44828	16.7051	57.6038
D1D5	7	0.2	0.17	0.37	2.7027	20.6222	55.7356		D1D8	7	0.14	0.13	0.27	3.7037	21.6994	80.3682
D1D5	7	0.16	0.17	0.33	3.0303	20.0454	60.7438		D1D8	7	0.19	0.11	0.3	3.33333	25.6549	85.5163
D1D5	7	0.16	0.15	0.31	3.22581	23.3348	75.2737		D1D8	7	0.16	0.13	0.29	3.44828	26.1983	90.3391
D1D5	7	0.18	0.15	0.33	3.0303	25.1093	76.0887		D1D8	7	0.13	0.12	0.25	4	16.7493	66.9974
D1D5	7	0.16	0.25	0.41	2.43902	18.1884	44.3621		D1D8	7	0.16	0.13	0.29	3.44828	24.8331	85.6312
D1D5	7	0.16	0.21	0.37	2.7027	21.6755	58.5826		D1D8	8	0.11	0.1	0.21	4.7619	23.9303	113.954
D1D5	7	0.16	0.16	0.32	3.125	22.8843	71.5134		D1D8	8	0.12	0.12	0.24	4.16667	23.872	99.4668
D1D5	7	0.19	0.18	0.37	2.7027	23.1997	62.7018		D1D8	8	0.1	0.11	0.21	4.7619	24.3881	116.134
D1D5	7	0.16	0.14	0.3	3.33333	21.515	71.7165		D1D8	8	0.1	0.1	0.2	5	22.494	112.47
D1D5	7	0.15	0.14	0.29	3.44828	20.8027	71.7335		D1D8	8	0.12	0.11	0.23	4.34783	22.8948	99.5426
D1D5	8	0.15	0.14	0.29	3.44828	21.4601	74.0004		D1D8	8	0.14	0.11	0.25	4	23.8543	95.4173
D1D5	8	0.14	0.12	0.26	3.84615	22.0522	84.8163		D1D8	8	0.09	0.08	0.17	5.88235	20.8365	122.568
D1D5	8	0.15	0.13	0.28	3.57143	24.475	87.4106		D1D8	8	0.13	0.12	0.25	4	25.647	102.588
D1D5	8	0.15	0.13	0.28	3.57143	25.097	89.6321		D1D8	8	0.13	0.07	0.2	5	23.7352	118.676
D1D5	8	0.13	0.12	0.25	4	22.9519	91.8075		D1D8	8	0.14	0.08	0.22	4.54545	24.9922	113.601
D1D5	8	0.13	0.12	0.25	4	23.5881	94.3526		D1D8	8	0.14	0.11	0.25	4	20.6372	82.5489
D1D5	8	0.13	0.11	0.24	4.16667	22.7282	94.7009		D1D8	8	0.13	0.1	0.23	4.34783	21.9768	95.5514
D1D5	8	0.12	0.1	0.22	4.54545	26.4257	120.117		D1D8	9	0.12	0.05	0.17	5.88235	19.3004	113.532
D1D5	8	0.11	0.12	0.23	4.34783	23.8133	103.536		D1D8	9	0.11	0.12	0.23	4.34783	18.0781	78.6006
D1D5	8	0.11	0.11	0.22	4.54545	24.0251	109.205		D1D8	9	0.11	0.15	0.26	3.84615	18.506	71.1769
D1D5	8	0.14	0.1	0.24	4.16667	25.7879	107.45		D1D8	9	0.13	0.15	0.28	3.57143	18.7264	66.8801
D1D5	9	0.12	0.18	0.3	3.33333	13.8592	46.1974		D1D8	9	0.11	0.08	0.19	5.26316	23.4534	123.439
D1D5	9	0.16	0.23	0.39	2.5641	14.5113	37.2085		D1D8	9	0.11	0.08	0.19	5.26316	21.4389	112.836
D1D5	9	0.14	0.32	0.46	2.17391	13.4173	29.1681		D1D8	9	0.11	0.08	0.19	5.26316	23.6128	124.278
D1D5	9	0.16	0.07	0.23	4.34783	19.2109	83.5258		D1D8	9	0.13	0.09	0.22	4.54545	22.2556	101.162
D1D5	9	0.15	0.14	0.29	3.44828	21.6437	74.6335		D1D8	9	0.11	0.11	0.22	4.54545	24.7931	112.696
D1D5	9	0.16	0.15	0.31	3.22581	18.9939	61.2707		D1D8	9	0.12	0.09	0.21	4.7619	22.006	104.791
D1D5	9	0.12	0.15	0.27	3.7037	17.6511	65.3744		D1D8	9	0.11	0.09	0.2	5	22.351	111.755
D1D5	9	0.13	0.12	0.25	4	18.5184	74.0737		D1D8	9	0.1	0.1	0.2	5	21.0513	105.256
D1D5	9	0.15	0.12	0.27	3.7037	22.4401	83.1115		D1D8	9	0.09	0.08	0.17	5.88235	14.6504	86.1787
D1D5	9	0.1	0.19	0.29	3.44828	16.1485	55.6845		D1D8	9	0.1	0.09	0.19	5.26316	17.6246	92.7612
D1D5	9	0.14	0.17	0.31	3.22581	17.0746	55.0794		D1D8	9	0.1	0.1	0.2	5	16.7471	83.7355
D1D5	9	0.13	0.14	0.27	3.7037	18.9463	70.1716		D1D8	11	0.12	0.09	0.21	4.7619	20.7821	98.9624
D1D5	9	0.13	0.23	0.36	2.77778	15.6676	43.521		D1D8	11	0.16	0.11	0.27	3.7037	14.8803	55.1123
D1D5	9	0.14	0.3	0.44	2.27273	13.4155	30.4899		D1D8	11	0.13	0.12	0.25	4	16.748	66.9919
D1D5	9	0.15	0.25	0.4	2.5	14.2152	35.538		D1D8	11	0.13	0.16	0.29	3.44828	19.672	67.8343
D1D5	11	0.14	0.12	0.26	3.84615	20.9146	80.4409		D1D8	11	0.09	0.16	0.25	4	15.335	61.3402
D1D5	11	0.13	0.15	0.28	3.57143	19.2059	68.5926		D1D8	11	0.11	0.14	0.25	4	19.9443	79.7774
D1D5	11	0.15	0.14	0.29	3.44828	20.4661	70.5726		D1D8	11	0.14	0.21	0.35	2.85714	15.9317	45.5192
D1D5	11	0.15	0.14	0.29	3.44828	21.5031	74.1487		D1D8	11	0.11	0.14	0.25	4	15.3859	61.5437
D1D5	11	0.14	0.12	0.26	3.84615	20.6006	79.2331		D1D8	11	0.15	0.15	0.3	3.33333	15.095	50.3167
D1D5	11	0.09	0.22	0.31	3.22581	16.437	53.0227		D1D8	11	0.1	0.18	0.28	3.57143	16.3009	58.2174
D1D5	11	0.14	0.16	0.3	3.33333	20.5549	68.5164		D1D8	11	0.12	0.14	0.26	3.84615	19.8304	76.2707
D1D5	11	0.12	0.1	0.22	4.54545	20.6518	93.872		D1D8	11	0.13	0.15	0.28	3.57143	18.5453	66.2332
D1D5	11	0.15	0.11	0.26	3.84615	22.6699	87.1919		D1D8	11	0.09	0.13	0.22	4.54545	17.3416	78.8253
D1D5	11	0.14	0.12	0.26	3.84615	23.1051	88.8659		D1D8	11	0.13	0.11	0.24	4.16667	19.1586	79.8273
D1D5	11	0.16	0.12	0.28	3.57143	19.8351	70.8398		D1D8	11	0.12	0.09	0.21	4.7619	20.1742	96.0674
D1D5	11	0.17	0.13	0.3	3.33333	20.5107	68.369		D1D8	12	0.16	0.12	0.28	3.57143	21.9677	78.456
D1D5	11	0.12	0.1	0.22	4.54545	23.7156	107.798		D1D8	12	0.16	0.19	0.35	2.85714	19.2371	54.9632
D1D5	12	0.17	0.17	0.34	2.94118	21.6898	63.7934		D1D8	12	0.15	0.16	0.31	3.22581	18.1619	58.5869
D1D5	12	0.16	0.18	0.34	2.94118	22.6697	66.6757		D1D8	12	0.18	0.08	0.26	3.84615	18.8276	72.414
D1D5	12	0.16	0.19	0.35	2.85714	20.8546	59.5844		D1D8	12	0.16	0.14	0.3	3.33333	20.994	69.9799
D1D5	12	0.18	0.14	0.32	3.125	22.0771	68.991		D1D8	12	0.14	0.16	0.3	3.33333	22.9049	76.3495
D1D5	12	0.17	0.18	0.35	2.85714	19.4377	55.5362		D1D8	12	0.1	0.17	0.27	3.7037	16.2398	60.1474
D1D5	12	0.16	0.25	0.41	2.43902	15.5543	37.9372		D1D8	12	0.14	0.07	0.21	4.7619	23.3203	111.049
D1D5	12	0.16	0.26	0.42	2.38095	17.4378	52.8418		D1D8	12	0.12	0.09	0.21	4.7619	22.0588	105.042
D1D5	12	0.17	0.17	0.34	2.94118	15.2337	42.3159		D1D8	12	0.13	0.16	0.29	3.44828	21.2019	73.1102
D1D5	12	0.16	0.19	0.35	2.85714	18.0971	38.5044		D1D8	12	0.14	0.13	0.27	3.7037	22.4247	83.0546
D1D5	12	0.18	0.31	0.49	2.04082	21.992	57.8737		D1D8	12	0.14	0.08	0.22	4.54545	26.796	121.8
D1D5	12	0.21	0.2	0.41	2.43902	23.711	64.0839		D1D8	12	0.14	0.08	0.22	4.54545	23.3558	106.163
D1D5	12	0.2	0.16	0.36	2.77778	19.6406	46.7633		D1D8	14	0.15	0.1	0.25	4	22.5598	90.2391
D1D5	14	0.14	0.14	0.28	3.57143	21.0739	75.2638		D1D8	14	0.16	0.1	0.26	3.84615	21.0997	81.1527
D1D5	14	0.15	0.15	0.3	3.33333	21.6644	72.2148		D1D8	14	0.13	0.11	0.24	4.16667	19.5763	81.5677
D1D5	14	0.13	0.13	0.26	3.84615	20.6528	79.4337		D1D8	14	0.14	0.1	0.24	4.16667	21.4383	89.3264
D1D5	14	0.14	0.14	0.28	3.57143	23.0852	82.447		D1D8	14	0.15	0.11	0.26	3.84615	23.203	89.2425
D1D5	14	0.14	0.14	0.28	3.57143	19.4593	69.4976		D1D8	14	0.14	0.15	0.29	3.44828	19.8959	68.6067
D1D5	14	0.18	0.14	0.32	3.125	22.3528	69.8524		D1D8	14	0.16	0.18	0.34	2.94118	19.1935	56.4515
D1D5	14	0.14	0.2	0.34	2.94118	18.2717	53.7403		D1D8	14	0.13	0.15	0.28	3.57143	20.0801	71.7145
D1D5	14	0.15	0.17	0.32	3.125	19.7384	61.6826		D1D8	14	0.14	0.11	0.25	4	18.3217	73.2868
D1D5	14	0.16	0.12	0.28	3.57143	20.935	74.7679		D1D8	14	0.17	0.12	0.29	3.44828	21.0997	72.7576
D1D5	14	0.14	0.15	0.29	3.44828	20.5618	70.9028		D1D8	14	0.16	0.13	0.29	3.44828	21.5935	74.4602
D1D5	14	0.17	0.08	0.25	4	18.1491	72.5964		D1D8	14	0.15	0.13	0.28	3.57143	21.2861	76.0217
D1D5	14	0.15	0.17	0.32	3.125	19.2756	60.2364		D1D8	14	0.12	0.14	0.26	3.84615	11.3208	43.5416
D1D5	14	0.19	0.17	0.36	2.77778	19.1872	53.2979		D1D8	14	0.14	0.18	0.32	3.125	17.3517	54.224
D1D5	14	0.11	0.22	0.33	3.0303	13.3965	40.5953		D1D8	15	0.14	0.11	0.25	4	19.9165	79.6659
D1D5	14	0.14	0.26	0.4	2.5	15.4653	38.6633		D1D8	15	0.16	0.11	0.27	3.7037	17.4404	64.5942
D1D5	15	0.12	0.19	0.31	3.22581	17.1812	55.4233		D1D8	15	0.18	0.04	0.22	4.54545	18.7475	85.2161
D1D5	15	0.14	0.16	0.3	3.33333	21.4111	71.3703		D1D8	15	0.15	0.12	0.27	3.7037	20.4306	75.6691
D1D5	15	0.15	0.17	0.32	3.125	20.6165	64.4265		D1D8	15	0.14	0.14	0.28	3.57143	21.4062	76.4508
D1D5	15	0.14	0.28	0.42	2.38095	13.1898	31.4042		D1D8	15	0.14	0.12	0.26	3.84615	19.1888	73.8032
D1D5	15	0.16	0.13	0.29	3.44828	22.4255	77.3295		D1D8	15	0.16	0.06	0.22	4.54545	14.8715	67.5975
D1D5	15	0.19	0.29	0.48	2.08333	15.9893	33.311		D1D8	15	0.19	0.16	0.35	2.85714	22.641	64.6885
D1D5	15	0.16	0.16	0.32	3.125	19.7473	61.7103		D1D8	15	0.15	0.13	0.28	3.57143	15.3084	54.6729
D1D5	15	0.16	0.14	0.3	3.33333	19.7467	65.8223		D1D8	15	0.17	0.11	0.28	3.57143	20.9812	74.9327
D1D5	15	0.1	0.13	0.23	4.34783	12.2278	81.5189		D1D8	15	0.14	0.13	0.27	3.7037	17.5758	65.0955
D1D5	15	0.12	0.11	0.23	4.34783	15.1629	60.6516		D1D8	15	0.14	0.11	0.25	4	17.9096	71.6385
D1D5	15	0.15	0.13	0.28	3.57143	20.3078	72.5279		D1D8	15	0.12	0.13	0.25	4	15.066	60.2641
D1D5	15	0.12	0.18	0.3	3.33333	14.1284	47.0947		D1D8	16	0.14	0.09	0.23	4.34783	25.0693	108.997
D1D5	15	0.14	0.11	0.25	4	19.9408	79.7632		D1D8	16	0.1	0.08	0.18	5.55556	22.1303	122.946
D1D5	15	0.15	0.11	0.26	3.84615	21.6335	83.2058		D1D8	16	0.12	0.1	0.22	4.54545	21.9355	99.7069
D1D5	16	0.15	0.17	0.32	3.125	22.8437	71.3865		D1D8	16	0.14	0.11	0.25	4	15.5633	62.2532
D1D5	16	0.11	0.12	0.23	4.34783	20.8194	90.5191		D1D8	16	0.12	0.15	0.27	3.7037	16.8286	62.3283
D1D5	16	0.14	0.12	0.26	3.84615	19.2421	74.0081		D1D8	16	0.14	0.11	0.25	4	20.5172	82.0687
D1D5	16	0.14	0.11	0.25	4	21.4483	85.7934		D1D8	16	0.12	0.16	0.28	3.57143	14.4828	51.7245
D1D5	16	0.16	0.14	0.3	3.33333	20.8497	69.4991		D1D8	16	0.13	0.14	0.27	3.7037	19.169	70.9963
D1D5	16	0.12	0.11	0.23	4.34783	20.6856	89.9376		D1D8	16	0.12	0.17	0.29	3.44828	14.5549	50.1894
D1D5	16	0.12	0.12	0.24	4.16667	19.1498	79.791		D1D8	16	0.11	0.17	0.28	3.57143	20.3229	72.5817
D1D5	16	0.13	0.15	0.28	3.57143	21.2907	76.0382		D1D8	16	0.14	0.09	0.23	4.34783	19.6226	85.3157
D1D5	16	0.17	0.14	0.31	3.22581	19.0413	61.4236		D1D8	16	0.12	0.1	0.22	4.54545	18.2982	83.1735
D1D5	16	0.17	0.13	0.3	3.33333	22.8707	76.2356
D1D5	16	0.14	0.13	0.27	3.7037	20.2519	75.0071
D1D5	16	0.12	0.13	0.25	4	20.5738	82.2953
D1D5	16	0.15	0.13	0.28	3.57143	19.9395	71.2124
D1D5	16	0.14	0.16	0.3	3.33333	20.2436	67.4788
