# Supplementary material for: Silencing long ascending propriospinal neurons after spinal cord injury improves hindlimb stepping in the adult rat
Source: eLife. 2021 Dec 2;10:e70058. doi: 10.7554/eLife.70058 (PMC8639151; doi:10.7554/eLife.70058)
Supplement: Figure 3—source data 1. [file elife-70058-fig3-data1.xlsx]

## Sheet: Spared White Matter %
Animal ID	Spared White Matter at Epicenter (%)
1	13.71
3	23.32
4	21.96
6	14.85
7	13.01
9	17.97
11	17.79
12	18.11
14	14.82
15	34.64
Average	19.018
St Deviation	6.44555
