# Supplementary material for: Silencing long ascending propriospinal neurons after spinal cord injury improves hindlimb stepping in the adult rat
Source: eLife. 2021 Dec 2;10:e70058. doi: 10.7554/eLife.70058 (PMC8639151; doi:10.7554/eLife.70058)
Supplement: Figure 4—source data 1. [file elife-70058-fig4-data1.xlsx]

## Sheet: RI
Animal ID	Control Avg RI	Dox Avg RI			Animal ID	Control Time Point	RI Score			Animal ID	Dox Time Point	RI Score
1	63.5822	78.3555			1	PD2	58.9474			1	D2D5	75
3	84.1654	80.5658			1	PD3	68.2171			1	D2D8	87.8049
4	88.0952	85.5681			3	PD2	86.3636			1	D3D8	83.9506
6	60.9444	77.0842			3	PD3	81.9672			1	D3D20	66.6667
7	58.3362	77.3539			4	PD2	90.4762			3	D2D5	84.7458
9	59.4958	69.6092			4	PD3	85.7143			3	D2D8	78.0488
11	65.6428	70.1568			6	PD2	58.2524			3	D3D8	87.1795
12	25.6684	62.8796			6	PD3	63.6364			3	D3D20	72.2892
14	63.0034	79.3872			7	PD2	66.1871			4	D2D5	86.2069
15	88.4543	88.7846			7	PD3	50.4854			4	D2D8	87.8049
					9	PD2	50.4202			4	D3D8	81.0811
Average	65.7388	76.9745			9	PD3	68.5714			4	D3D20	87.1795
St Deviation	18.5289	7.69926			11	PD2	65.3061			6	D2D5	70.8861
					11	PD3	65.9794			6	D2D8	77.2727
					12	PD2	40.7407			6	D3D8	82.7586
					12	PD3	10.596			6	D3D20	77.4194
					14	PD2	51.0067			7	D2D5	66.6667
					14	PD3	75			7	D2D8	90.6667
					15	PD2	87.3563			7	D3D8	83.1169
					15	PD3	89.5522			7	D3D20	68.9655
										9	D2D5	62.1359
										9	D2D8	57.732
										9	D3D8	80.8989
										9	D3D20	77.6699
										11	D2D5	68.75
										11	D2D8	60
										11	D3D8	81.7204
										12	D2D5	59.7015
										12	D2D8	57.8261
										12	D3D8	71.1111
										14	D2D5	67.8571
										14	D2D8	86.9565
										14	D3D8	87.1795
										14	D3D20	75.5556
										15	D2D5	92.3077
										15	D2D8	81.0127
										15	D3D8	88.3117
										15	D3D20	93.5065

## Sheet: CPI
Animal ID	Control Avg CPI	Dox Avg CPI			Animal ID	Control Time Point	CPI Score			Animal ID	Dox Time Point	CPI Score
1	75.5411	86.0847			1	PD2	70.1299			1	D2D5	87.0968
3	87.6316	86.7449			1	PD3	80.9524			1	D2D8	93.75
4	88.6364	91.2639			3	PD2	90			1	D3D8	82.5397
6	80.3361	81.8494			3	PD3	85.2632			1	D3D20	80.9524
7	73.3036	80.6941			4	PD2	90.9091			3	D2D5	86.1702
9	69.3752	83.122			4	PD3	86.3636			3	D2D8	85.9375
11	81.1155	89.1282			6	PD2	83.5294			3	D3D8	93.3333
12	62.6509	82.6432			6	PD3	77.1429			3	D3D20	81.5385
14	78.3846	82.7216			7	PD2	86.6071			4	D2D5	93.4783
15	86.7545	84.1841			7	PD3	60			4	D2D8	90.625
					9	PD2	66.3366			4	D3D8	89.2857
Average	78.3729	84.8436			9	PD3	72.4138			4	D3D20	91.6667
St Deviation	8.39672	3.39379			11	PD2	83.75			6	D2D5	77.0492
					11	PD3	78.481			6	D2D8	84.2857
					12	PD2	73.3333			6	D3D8	85.5072
					12	PD3	51.9685			6	D3D20	80.5556
					14	PD2	76			7	D2D5	77.381
					14	PD3	80.7692			7	D2D8	87.7193
					15	PD2	89.8551			7	D3D8	77.9661
					15	PD3	83.6538			7	D3D20	79.7101
										9	D2D5	90.3846
										9	D2D8	82.2785
										9	D3D8	73.2394
										9	D3D20	86.5854
										11	D2D5	84.6154
										11	D2D8	90.7692
										11	D3D8	92
										12	D2D5	90.3846
										12	D2D8	78.3784
										12	D3D8	79.1667
										14	D2D5	75
										14	D2D8	87.037
										14	D3D8	84.127
										14	D3D20	84.7222
										15	D2D5	85
										15	D2D8	73.7705
										15	D3D8	84.7458
										15	D3D20	93.2203

## Sheet: PSI
Animal ID	Control Avg PSI	Dox Avg PSI			Animal ID	Control Time Point	PSI Score			Animal ID	Dox Time Point	PSI Score
1	84.5599	96.1611			1	PD2	81.8182			1	D2D5	100
3	91.5873	90.8547			1	PD3	87.3016			1	D2D8	97.561
4	93.129	92.4852			3	PD2	91.1111			1	D3D8	97.5
6	81.2835	86.3659			3	PD3	92.0635			1	D3D20	89.5833
7	85.6061	95.3635			4	PD2	95.3488			3	D2D5	93.3333
9	84.6792	89.5504			4	PD3	90.9091			3	D2D8	77.7778
11	83.2742	85.2593			6	PD2	78.8462			3	D3D8	97.4359
12	59.375	80.4588			6	PD3	83.7209			3	D3D20	94.8718
14	73.3526	85.6256			7	PD2	89.3939			4	D2D5	93.3333
15	90.2795	88.5431			7	PD3	81.8182			4	D2D8	86.3636
					9	PD2	77.3585			4	D3D8	100
Average	82.7126	89.0668			9	PD3	92			4	D3D20	90.2439
St Deviation	9.97097	4.86597			11	PD2	79.5918			6	D2D5	80.4878
					11	PD3	86.9565			6	D2D8	88.8889
					12	PD2	68.75			6	D3D8	82.6087
					12	PD3	50			6	D3D20	93.4783
					14	PD2	65.8228			7	D2D5	98.0392
					14	PD3	80.8824			7	D2D8	100
					15	PD2	89.1304			7	D3D8	97.3684
					15	PD3	91.4286			7	D3D20	86.0465
										9	D2D5	93.617
										9	D2D8	87.234
										9	D3D8	88.8889
										9	D3D20	88.4615
										11	D2D5	82.8125
										11	D2D8	79.4872
										11	D3D8	93.4783
										12	D2D5	78.7879
										12	D2D8	69.5652
										12	D3D8	93.0233
										14	D2D5	82.1429
										14	D2D8	91.6667
										14	D3D8	85.7143
										14	D3D20	82.9787
										15	D2D5	90.2439
										15	D2D8	88.0952
										15	D3D8	83.3333
										15	D3D20	92.5

## Sheet: BBB Analyses
Animal ID	Condition	Average Score			Animal ID	Condition	Average Score			AnimaI ID	Time Point	Side	Control Raw BBB Score			Animal ID	Condition	Side	Dox Raw BBB Score
1	Con Right	12.5			1	Dox Right	12.75			1	PD2	R	12			1	D2D5	R	16		*Animals 11 and 12 euthanized at D3D8 time point
3	Con Right	12			3	Dox Right	13.75			3	PD2	R	12			3	D2D5	R	15
4	Con Right	12			4	Dox Right	15.5			4	PD2	R	13			4	D2D5	R	18
6	Con Right	11			6	Dox Right	12			6	PD2	R	11			6	D2D5	R	13
7	Con Right	12.5			7	Dox Right	13.25			7	PD2	R	12			7	D2D5	R	13
9	Con Right	11.5			9	Dox Right	12.25			9	PD2	R	11			9	D2D5	R	13
11	Con Right	12			11	Dox Right	13			11	PD2	R	12			11	D2D5	R	12
12	Con Right	11.5			12	Dox Right	12			12	PD2	R	11			12	D2D5	R	12
14	Con Right	13.5			14	Dox Right	14.25			14	PD2	R	12			14	D2D5	R	15
15	Con Right	12.5			15	Dox Right	12.25			15	PD2	R	12			15	D2D5	R	13
1	Con Left	11.5			1	Dox Left	12.75			1	PD2	L	12			1	D2D5	L	16
3	Con Left	12			3	Dox Left	13.75			3	PD2	L	12			3	D2D5	L	15
4	Con Left	12.5			4	Dox Left	15.5			4	PD2	L	13			4	D2D5	L	18
6	Con Left	12			6	Dox Left	12			6	PD2	L	11			6	D2D5	L	13
7	Con Left	12			7	Dox Left	13.25			7	PD2	L	12			7	D2D5	L	13
9	Con Left	11			9	Dox Left	12.25			9	PD2	L	11			9	D2D5	L	13
11	Con Left	12			11	Dox Left	13			11	PD2	L	12			11	D2D5	L	12
12	Con Left	11.5			12	Dox Left	12			12	PD2	L	11			12	D2D5	L	12
14	Con Left	12			14	Dox Left	14.25			14	PD2	L	12			14	D2D5	L	15
15	Con Left	12			15	Dox Left	12.25			15	PD2	L	12			15	D2D5	L	13
	Average	11.975				Average	13.1			1	PD3	R	13			1	D2D8	R	13
	St Deviation	0.572966				St Deviation	1.10143			3	PD3	R	12			3	D2D8	R	16
										4	PD3	R	11			4	D2D8	R	18
										6	PD3	R	11			6	D2D8	R	12
										7	PD3	R	13			7	D2D8	R	16
										9	PD3	R	12			9	D2D8	R	13
										11	PD3	R	12			11	D2D8	R	16
										12	PD3	R	12			12	D2D8	R	12
										14	PD3	R	15			14	D2D8	R	18
										15	PD3	R	13			15	D2D8	R	13
										1	PD3	L	11			1	D2D8	L	13
										3	PD3	L	12			3	D2D8	L	16
										4	PD3	L	12			4	D2D8	L	18
										6	PD3	L	13			6	D2D8	L	12
										7	PD3	L	12			7	D2D8	L	16
										9	PD3	L	11			9	D2D8	L	13
										11	PD3	L	12			11	D2D8	L	16
										12	PD3	L	12			12	D2D8	L	12
										14	PD3	L	12			14	D2D8	L	18
										15	PD3	L	12			15	D2D8	L	13
																1	D3D8	R	11
												Total Scores	40			3	D3D8	R	12
												Scores > 2.S.D.	1			4	D3D8	R	13
												% of BBB Scores	2.5			6	D3D8	R	11
																7	D3D8	R	11
																9	D3D8	R	11
																11	D3D8	R	11
																12	D3D8	R	12
																14	D3D8	R	13
																15	D3D8	R	12
																1	D3D8	L	11
																3	D3D8	L	12
																4	D3D8	L	13
																6	D3D8	L	11
																7	D3D8	L	11
																9	D3D8	L	11
																11	D3D8	L	11
																12	D3D8	L	12
																14	D3D8	L	13
																15	D3D8	L	12
																1	D3D20	R	11
																3	D3D20	R	12
																4	D3D20	R	13
																6	D3D20	R	12
																7	D3D20	R	13
																9	D3D20	R	12
																14	D3D20	R	11
																15	D3D20	R	11
																1	D3D20	L	11
																3	D3D20	L	12
																4	D3D20	L	13
																6	D3D20	L	12
																7	D3D20	L	13
																9	D3D20	L	12
																14	D3D20	L	11
																15	D3D20	L	11
																		Total Scores	76
																		Scores > 2.S.D.	18
																		% of BBB Scores	23.6842
