# Supplementary material for: Silencing long ascending propriospinal neurons after spinal cord injury improves hindlimb stepping in the adult rat
Source: eLife. 2021 Dec 2;10:e70058. doi: 10.7554/eLife.70058 (PMC8639151; doi:10.7554/eLife.70058)
Supplement: Figure 5—source data 1. [file elife-70058-fig5-data1.xlsx]

## Sheet: Avg Angle Excursions - Injured
Distal Angle Averages							Proximal Angle Averages
Animal ID	Control Right	Dox Right	Control Left	Dox Left			Animal ID	Control Right	Dox Right	Control Left	Dox Left
1	82.9129	87.6894	57.9646	90.791			1	46.5663	47.0213	37.5836	43.089
3	71.1152	84.3411	82.7213	80.8167			3	46.2407	49.2313	45.7142	50.8465
4	81.9753	88.581	75.1055	78.8418			4	50.6673	54.6543	56.5715	58.2376
6	82.9673	87.3746	61.5052	76.1926			6	51.5421	51.1857	41.2339	49.7712
7	71.3315	85.0223	79.4294	86.7378			7	44.1792	45.8492	48.9822	51.8948
9	78.4349	77.1673	59.2912	82.3116			9	46.7274	46.8652	40.4386	50.9018
11	66.1936	94.297	84.4944	98.0948			11	50.2502	51.894	57.3122	51.5356
12	57.705	69.7695	71.1039	82.0572			12	33.556	43.8703	47.6917	53.3236
14	75.5774	81.6773	93.7144	95.9294			14	42.4367	47.8421	43.5699	47.9038
15	84.7271	78.0668	80.9185	85.578			15	52.3265	55.3296	57.3514	57.1922
Average	75.294	83.3986	74.6248	85.7351			Average	46.4492	49.3743	47.6449	51.4696
St Deviation	8.72958	6.98688	11.9606	7.23642			St Deviation	5.58114	3.79903	7.33139	4.32974
