# Supplementary material for: Silencing long ascending propriospinal neurons after spinal cord injury improves hindlimb stepping in the adult rat
Source: eLife. 2021 Dec 2;10:e70058. doi: 10.7554/eLife.70058 (PMC8639151; doi:10.7554/eLife.70058)
Supplement: Figure 6—figure supplement 1—source data 1. [file elife-70058-fig6-figsupp1-data1.xlsx]

## Sheet: Pre-SCI Phase Data
Time point	Animal ID	Hindlimb Phase	Heterolateral Phase	Homolateral Phase			Time point	Animal ID	Hindlimb Phase	Heterolateral Phase	Homolateral Phase
BL	2	0.5	0.0909091	0.545455			D1D5	2	0.545455	0.0909091	0.636364
BL	2	0.52381	0	0.619048			D1D5	2	0.516129	0.0967742	0.580645
BL	2	0.5	0.0625	0.590909			D1D5	2	0.52	0	0.56
BL	2	0.5	0.115385	0.576923			D1D5	2	0.551724	0.103448	0.551724
BL	2	0.6	0	0.65			D1D5	2	0.555556	0	0.555556
BL	2	0.5	0.05	0.541667			D1D5	2	0.6	0.148148	0.6
BL	2	0.565217	0.0869565	0.565217			D1D5	2	0.551724	0	0.517241
BL	2	0.545455	0.136364	0.636364			D1D5	2	0.535714	0.0357143	0.5
BL	2	0.535714	0.0714286	0.5			D1D5	2	0.5	0.0769231	0.538462
BL	2	0.521739	0.0434783	0.521739			D1D5	2	0.518519	0.037037	0.555556
BL	2	0.52	0.04	0.6			D1D5	2	0.52	0	0.56
BL	2	0.5	0.0416667	0.541667			D1D5	2	0.538462	0.04	0.5
BL	2	0.515152	0.030303	0.545455			D1D5	2	0.583333	0	0.541667
BL	2	0.541667	0.0606061	0.583333			D1D5	2	0.541667	0.0416667	0.5
BL	2	0.621622	0.125	0.621622			D1D5	5	0.580645	0	0.645161
BL	5	0.514286	0.228571	0.628571			D1D5	5	0.526316	0.0967742	0.552632
BL	5	0.518519	0.148148	0.666667			D1D5	5	0.540541	0.105263	0.621622
BL	5	0.565217	0.173913	0.652174			D1D5	5	0.5	0.159091	0.613636
BL	5	0.5	0.166667	0.666667			D1D5	5	0.571429	0.190476	0.809524
BL	5	0.607143	0	0.95			D1D5	5	0.540541	0.135135	0.675676
BL	5	0.5	0.142857	0.769231			D1D5	5	0.5	0.2	0.7
BL	5	0.56	0.12	0.56			D1D5	5	0.516129	0.125	0.709677
BL	5	0.521739	0.217391	0.652174			D1D5	5	0.53125	0.0606061	0.75
BL	5	0.53125	0.125	0.59375			D1D5	5	0.515152	0.142857	0.545455
BL	5	0.590909	0	0.681818			D1D5	5	0.542857	0.222222	0.628571
BL	5	0.541667	0.0909091	0.583333			D1D5	5	0.555556	0.137931	0.666667
BL	5	0.551724	0.0833333	0.551724			D1D5	5	0.551724	0.0277778	0.62069
BL	5	0.608696	0.103448	0.565217			D1D5	5	0.527778	0.0967742	0.611111
BL	5	0.517241	0.137931	0.586207			D1D5	10	0.552632	0	0.578947
BL	5	0.515152	0.121212	0.606061			D1D5	10	0.5	0.105263	0.605263
BL	10	0.538462	0.0384615	0.538462			D1D5	10	0.529412	0.176471	0.588235
BL	10	0.52	0.04	0.56			D1D5	10	0.586207	0	1
BL	10	0.52	0.16	0.64			D1D5	10	0.571429	0	0.514286
BL	10	0.52	0.16	0.64			D1D5	10	0.515152	0	0.545455
BL	10	0.5	0.1	0.666667			D1D5	10	0.52381	0.0714286	0.52381
BL	10	0.65625	0.125	0.5			D1D5	10	0.5	0	0.535714
BL	10	0.565217	0.0434783	0.608696			D1D5	10	0.56	0.107143	0.6
BL	10	0.590909	0.181818	0.681818			D1D5	10	0.602174	0	0.608696
BL	10	0.545455	0.0909091	0.590909			D1D5	10	0.53125	0.09375	0.5
BL	10	0.517241	0	0.517241			D1D5	10	0.571429	0.0238095	0.595238
BL	10	0.548387	0.0645161	0.548387			D1D5	10	0.575	0	0.65
BL	10	0.541667	0	0.541667			D1D5	10	0.529412	0.2	0.529412
BL	10	0.5	0	0.583333			D1D5	10	0.517241	0.0294118	0.551724
BL	10	0.555556	0.037037	0.666667			D1D5	13	0.513514	0	0.594595
BL	10	0.517241	0.0689655	0.517241			D1D5	13	0.514286	0.108108	0.628571
BL	13	0.535714	0.0714286	0.607143			D1D5	13	0.530612	0.0204082	0.55102
BL	13	0.515152	0.0909091	0.575758			D1D5	13	0.578947	0.0789474	0.605263
BL	13	0.565217	0	0.652174			D1D5	13	0.526316	0.0263158	0.605263
BL	13	0.518519	0.130435	0.62963			D1D5	13	0.589744	0	0.589744
BL	13	0.545455	0	0.545455			D1D5	13	0.522727	0.0512821	0.590909
BL	13	0.518519	0.0606061	0.518519			D1D5	13	0.526316	0.0681818	0.526316
BL	13	0.583333	0	0.527778			D1D5	13	0.545455	0	0.590909
BL	13	0.533333	0.1	0.533333			D1D5	13	0.555556	0.0909091	0.6
BL	13	0.518519	0	0.555556			D1D5	13	0.5	0	0.6875
BL	13	0.517241	0.0344828	0.517241			D1D5	13	0.512195	0	0.560976
BL	13	0.564103	0.0512821	0.615385			D1D5	13	0.595745	0.170213	0.510638
BL	13	0.551724	0.137931	0.586207			D1D8	2	0.538462	0.0769231	0.538462
BL	13	0.56	0.12	0.52			D1D8	2	0.565217	0.0434783	0.565217
BL	13	0.551724	0.0344828	0.586207			D1D8	2	0.52	0	0.52
PD1	2	0.5	0.05	0.65			D1D8	2	0.521739	0	0.521739
PD1	2	0.521739	0.173913	0.608696			D1D8	2	0.5	0	0.5
PD1	2	0.538462	0.153846	0.653846			D1D8	2	0.535714	0.0666667	0.571429
PD1	2	0.545455	0.136364	0.636364			D1D8	2	0.617647	0.0882353	0.588235
PD1	2	0.521739	0.0869565	0.565217			D1D8	2	0.552632	0.0526316	0.605263
PD1	2	0.52	0	0.52			D1D8	2	0.518519	0	0.592593
PD1	2	0.521739	0.0869565	0.565217			D1D8	2	0.5625	0.037037	0.53125
PD1	2	0.56	0	0.56			D1D8	2	0.5	0	0.571429
PD1	2	0.52	0.16	0.56			D1D8	2	0.518519	0	0.518519
PD1	2	0.5	0.08	0.55			D1D8	2	0.566667	0.121212	0.6
PD1	2	0.65	0	0.65			D1D8	2	0.545455	0	0.545455
PD1	2	0.555556	0.15	0.611111			D1D8	5	0.6	0	0.56
PD1	2	0.521739	0.0434783	0.565217			D1D8	5	0.565217	0.2	0.608696
PD1	2	0.590909	0.0909091	0.590909			D1D8	5	0.571429	0.107143	0.607143
PD1	5	0.518519	0.111111	0.592593			D1D8	5	0.517241	0.137931	0.586207
PD1	5	0.52	0.12	0.64			D1D8	5	0.611111	0	0.694444
PD1	5	0.548387	0.193548	0.645161			D1D8	5	0.566667	0.25	0.566667
PD1	5	0.5	0.153846	0.692308			D1D8	5	0.5	0.0666667	0.6
PD1	5	0.52	0.08	0.64			D1D8	5	0.545455	0.204545	0.613636
PD1	5	0.515152	0.242424	0.69697			D1D8	5	0.514286	0.228571	0.657143
PD1	5	0.62069	0	0.655172			D1D8	5	0.566667	0.233333	0.7
PD1	5	0.5	0.241379	0.576923			D1D8	5	0.547619	0	0.738095
PD1	5	0.5	0	0.590909			D1D8	5	0.540541	0.108108	0.513514
PD1	5	0.5	0.0454545	0.583333			D1D8	5	0.516129	0.0645161	0.580645
PD1	5	0.5	0.09375	0.53125			D1D8	5	0.516129	0.193548	0.645161
PD1	5	0.56	0.08	0.6			D1D8	10	0.5	0	0.5
PD1	5	0.538462	0	0.615385			D1D8	10	0.548387	0.1	0.516129
PD1	5	0.517241	0.0769231	0.62069			D1D8	10	0.576923	0	0.538462
PD1	10	0.541667	0.125	0.583333			D1D8	10	0.576923	0	0.538462
PD1	10	0.541667	0.125	0.583333			D1D8	10	0.5	0.107143	0.535714
PD1	10	0.5	0.136364	0.590909			D1D8	10	0.617647	0	0.676471
PD1	10	0.52381	0.142857	0.571429			D1D8	10	0.558824	0.0588235	0.558824
PD1	10	0.608696	0.173913	0.652174			D1D8	10	0.535714	0.0357143	0.607143
PD1	10	0.521739	0.0434783	0.521739			D1D8	10	0.514286	0.142857	0.571429
PD1	10	0.55	0	0.55			D1D8	10	0.583333	0	0.655172
PD1	10	0.5	0.107143	0.571429			D1D8	10	0.5	0.0645161	0.645161
PD1	10	0.533333	0.2	0.533333			D1D8	10	0.594595	0.133333	0.533333
PD1	10	0.56	0.12	0.56			D1D8	10	0.548387	0.16129	0.580645
PD1	10	0.555556	0	0.5			D1D8	10	0.618571	0.107143	0.571429
PD1	10	0.529412	0	0.588235			D1D8	10	0.525	0.05	0.5
PD1	10	0.611111	0.117647	0.555556			D1D8	13	0.5	0	0.59375
PD1	13	0.566667	0.0666667	0.5			D1D8	13	0.515152	0.09375	0.606061
PD1	13	0.551724	0.0344828	0.586207			D1D8	13	0.615385	0	0.615385
PD1	13	0.580645	0.0967742	0.516129			D1D8	13	0.517241	0.0384615	0.551724
PD1	13	0.571429	0.0967742	0.642857			D1D8	13	0.571429	0.0571429	0.514286
PD1	13	0.533333	0.142857	0.566667			D1D8	13	0.555556	0	0.555556
PD1	13	0.516129	0	0.516129			D1D8	13	0.576923	0.148148	0.615385
PD1	13	0.586207	0	0.586207			D1D8	13	0.517241	0.0384615	0.551724
PD1	13	0.518519	0.129032	0.518519			D1D8	13	0.535714	0.0344828	0.5
PD1	13	0.5	0	0.571429			D1D8	13	0.535714	0.0714286	0.5
PD1	13	0.645161	0.16129	0.548387			D1D8	13	0.5	0.0357143	0.583333
PD1	13	0.516129	0	0.516129
PD1	13	0.53125	0.16129	0.59375
PD1	13	0.542857	0.0857143	0.514286
PostD1	2	0.518519	0.037037	0.555556
PostD1	2	0.555556	0.037037	0.592593
PostD1	2	0.518519	0.111111	0.555556
PostD1	2	0.5	0.0555556	0.527778
PostD1	2	0.516129	0.0967742	0.612903
PostD1	2	0.533333	0.08	0.566667
PostD1	2	0.56	0.0833333	0.56
PostD1	2	0.5	0	0.583333
PostD1	2	0.529412	0	0.529412
PostD1	2	0.555556	0	0.518519
PostD1	2	0.52	0.16	0.56
PostD1	5	0.540541	0.0540541	0.540541
PostD1	5	0.535714	0.0357143	0.571429
PostD1	5	0.526316	0.0789474	0.526316
PostD1	5	0.526316	0.0263158	0.605263
PostD1	5	0.527778	0.0833333	0.583333
PostD1	5	0.536585	0.0731707	0.585366
PostD1	5	0.675	0.075	0.55
PostD1	5	0.517241	0.075	0.586207
PostD1	5	0.6	0	0.533333
PostD1	5	0.517241	0.0333333	0.551724
PostD1	5	0.535714	0.0714286	0.535714
PostD1	5	0.52	0.08	0.56
PostD1	5	0.612903	0.193548	0.645161
PostD1	5	0.592593	0.111111	0.666667
PostD1	5	0.566667	0.1	0.533333
PostD1	10	0.615385	0.037037	0.692308
PostD1	10	0.62963	0.0882353	0.518519
PostD1	10	0.558824	0.121212	0.617647
PostD1	10	0.545455	0.133333	0.575758
PostD1	10	0.5	0.15625	0.566667
PostD1	10	0.59375	0.133333	0.5625
PostD1	10	0.533333	0.0833333	0.6
PostD1	10	0.583333	0.0606061	0.5
PostD1	10	0.515152	0.121212	0.515152
PostD1	10	0.5	0.03125	0.53125
PostD1	10	0.571429	0.09375	0.530612
PostD1	13	0.526316	0.0789474	0.552632
PostD1	13	0.55	0.025	0.575
PostD1	13	0.52	0.12	0.58
PostD1	13	0.606061	0.030303	0.515152
PostD1	13	0.551724	0	0.586207
PostD1	13	0.516129	0	0.516129
PostD1	13	0.512821	0.0645161	0.512821
PostD1	13	0.55	0.0625	0.575
PostD1	13	0.516129	0.0263158	0.612903
PostD1	13	0.5	0.121951	0.5625
	Average	0.54153	0.081336	0.582283				Average	0.543048	0.0686466	0.587024
	St. Deviation	0.0364949	0.0594569	0.0579598				St. Deviation	0.0318574	0.068146	0.071823
	Total Number Steps	160	160	160				Total Number Steps	110	110	110
	# of steps outside 2 S.D.	5	3	2				# of steps outside 2 S.D.	0	3	3

## Sheet: Post-SCI Phase Data
Time point	Animal ID	Hindlimb Phase	Heterolateral Phase	Homolateral Phase			Time point	Animal ID	Hindlimb Phase	Heterolateral Phase	Homolateral Phase
PD2	2	0.583333	0.333333	0.909091			D2D8	2	0.529412	0.0882353	0.558824
PD2	2	0.545455	0.5	0.727273			D2D8	2	0.535714	0.0714286	0.5
PD2	2	0.647059	0.0588235	0.928571			D2D8	2	0.53125	0.0625	0.65625
PD2	2	0.5	0.12	0.590909			D2D8	2	0.5	0	0.5
PD2	2	0.52	0.04	0.52			D2D8	2	0.515152	0	0.666667
PD2	2	0.56	0.44	0.92			D2D8	2	0.818182	0.5	0.833333
PD2	2	0.555556	0.388889	0.923077			D2D8	2	0.708333	0.291667	0.6
PD2	2	0.923077	0.423077	0.807692			D2D8	2	0.64	0.16	0.684211
PD2	2	0.590909	0.136364	0.636364			D2D8	2	0.684211	0.166667	0.791667
PD2	2	0.736842	0.157895	0.636364			D2D8	2	0.75	0.361111	0.694444
PD2	2	0.578947	0.181818	0.736842			D2D8	2	0.527778	0.142857	0.642857
PD2	2	0.666667	0.25	0.681818			D2D8	2	0.607143	0.08	0.56
PD2	2	0.772727	0.25	0.590909			D2D8	2	0.64	0	0.555556
PD2	2	0.857143	0.235294	0.714286			D2D8	2	0.592593	0.3	0.642857
PD2	2	1	0.0714286	0.535714			D2D8	2	0.678571	0.111111	0.766667
PD2	5	0.5	0.411765	0.735294			D2D8	5	0.974359	0	0.564103
PD2	5	0.608696	0.478261	0.913043			D2D8	5	0.512821	0.128205	0.589744
PD2	5	0.956522	0.3125	0.956522			D2D8	5	0.586667	0.293333	0.933333
PD2	5	0.5	0.107143	0.571429			D2D8	5	0.626667	0.106667	0.546667
PD2	5	0.583333	0.0357143	0.666667			D2D8	5	0.871429	0.228571	0.757143
PD2	5	0.533333	0.1	0.533333			D2D8	5	0.5625	0.1875	0.604167
PD2	5	0.5	0.1	0.555556			D2D8	5	0.588235	0.145833	0.794118
PD2	5	0.568182	0.25	0.636364			D2D8	5	0.543478	0.434783	0.913043
PD2	5	0.516129	0.419355	0.741935			D2D8	5	0.637931	0.241379	0.568966
PD2	5	0.533333	0.233333	0.903226			D2D8	5	0.595238	0.293103	0.948276
PD2	5	0.516129	0.0333333	0.6			D2D8	5	0.689655	0.448276	0.896552
PD2	5	0.689655	0.172414	0.517241			D2D8	5	0.947368	0.473684	0.8
PD2	5	0.5625	0.0625	0.53125			D2D8	5	0.588235	0	0.627451
PD2	5	0.909091	0.153846	1			D2D8	5	0.947368	0.372549	0.941176
PD2	5	0.571429	0.238095	0.545455			D2D8	10	0.515152	0.242424	0.69697
PD2	10	0.621622	0.324324	0.837838			D2D8	10	0.512821	0.282051	0.717949
PD2	10	0.551724	0.172414	0.827586			D2D8	10	0.542857	0.2	0.771429
PD2	10	0.6	0.0285714	0.571429			D2D8	10	0.529412	0.0322581	0.558824
PD2	10	0.565217	0.0512821	0.521739			D2D8	10	0.677419	0.366667	0.774194
PD2	10	0.541667	0.166667	0.833333			D2D8	10	0.6	0.384615	0.933333
PD2	10	1	0.178571	0.75			D2D8	10	0.923077	0.42623	0.7
PD2	10	0.678571	0.216216	0.540541			D2D8	10	0.590164	0.166667	0.868852
PD2	10	0.5	0.392857	0.964286			D2D8	10	0.785714	0.25	0.892857
PD2	10	0.535714	0.0714286	0.678571			D2D8	10	0.542857	0.0322581	0.542857
PD2	10	0.608696	0.173913	0.826087			D2D8	10	0.5	0.21875	0.59375
PD2	10	0.583333	0.25	0.875			D2D8	10	0.564103	0.205128	0.615385
PD2	10	0.705882	0.196078	0.529412			D2D8	10	0.729167	0.0833333	0.583333
PD2	10	0.72549	0.235294	0.931034			D2D8	10	0.625	0.0208333	0.882353
PD3	2	0.5	0.181818	0.545455			D3D8	2	0.571429	0	0.5
PD3	2	0.575758	0.0909091	0.515152			D3D8	2	0.576923	0.384615	1
PD3	2	0.53125	0.03125	0.5			D3D8	2	0.5	0.5	1
PD3	2	0.535714	0.2	0.642857			D3D8	2	0.5625	0.125	0.625
PD3	2	0.5	0.1875	0.576923			D3D8	2	0.5	0.2	0.6
PD3	2	0.5	0.266667	0.75			D3D8	2	0.592593	0.222222	0.62963
PD3	2	0.666667	0.190476	0.766667			D3D8	2	0.5625	0.25	0.75
PD3	2	0.5625	0	0.809524			D3D8	2	0.515152	0.181818	0.636364
PD3	2	0.5	0.291667	0.65625			D3D8	2	0.583333	0.138889	0.638889
PD3	2	0.517241	0.344828	0.875			D3D8	2	0.55	0.25	0.675
PD3	2	0.9	0.15	0.793103			D3D8	2	0.592593	0.259259	0.740741
PD3	2	0.9	0.4	0.8			D3D8	2	0.666667	0.111111	0.592593
PD3	2	0.935484	0.322581	0.749935			D3D8	2	0.606061	0.151515	0.69697
PD3	2	0.580645	0.0833333	0.666667			D3D8	2	0.566667	0.0666667	0.6
PD3	5	0.547619	0.0238095	0.52381			D3D8	5	0.6	0.0333333	0.666667
PD3	5	0.952381	0.190476	0.666667			D3D8	5	0.527778	0.0333333	0.527778
PD3	5	0.514286	0.114286	0.657143			D3D8	5	0.608696	0.26087	0.695652
PD3	5	0.533333	0.433333	0.966667			D3D8	5	0.869565	0.137931	0.62069
PD3	5	0.5	0.166667	0.642857			D3D8	5	0.551724	0.142857	0.642857
PD3	5	0.5	0.333333	0.777778			D3D8	5	0.581395	0.488372	0.930233
PD3	5	0.571429	0.0857143	0.685714			D3D8	5	0.5	0.229167	0.976744
PD3	5	0.555556	0.25	0.638889			D3D8	5	0.516129	0.322581	0.548387
PD3	5	0.5625	0.09375	0.53125			D3D8	5	0.518519	0.481481	0.962963
PD3	5	0.555556	0.0277778	0.527778			D3D8	5	0.513274	0.141593	1
PD3	5	0.580645	0.166667	0.677419			D3D8	5	0.581395	0.44186	0.790698
PD3	5	0.645833	0.428571	0.958333			D3D8	5	0.59375	0.25	0.906977
PD3	5	0.971429	0.416667	0.791667			D3D8	5	0.5	0.441176	0.941176
PD3	5	0.657143	0.142857	0.771429			D3D8	5	0.909091	0.409091	0.911765
PD3	5	0.945946	0.324324	0.810811			D3D8	5	0.628571	0.314286	1
PD3	10	0.678571	0.285714	0.785714			D3D8	10	0.588235	0.411765	0.941176
PD3	10	0.536585	0.414634	0.804878			D3D8	10	0.55	0.15	0.75
PD3	10	0.535714	0.357143	0.928571			D3D8	10	0.533333	0.133333	0.733333
PD3	10	0.538462	0.307692	0.757949			D3D8	10	0.592593	0.037037	0.592593
PD3	10	0.529412	0.235294	0.794118			D3D8	10	0.541667	0	0.666667
PD3	10	0.888889	0.388889	0.571429			D3D8	10	0.592593	0.148148	0.740741
PD3	10	0.653846	0.263158	0.692308			D3D8	10	0.592593	0.444444	1
PD3	10	0.526316	0.236842	0.763158			D3D8	10	0.518519	0.259259	0.851852
PD3	10	0.552632	0.473684	0.763158			D3D8	10	0.571429	0.178571	0.666667
PD3	10	0.542857	0.482759	0.827586			D3D8	10	0.518519	0	0.592593
PD3	10	0.692308	0.228571	0.771429			D3D8	10	0.90625	0.25	0.5625
PD3	10	0.636364	0.230769	0.846154			D3D8	10	0.84375	0.363636	0.736842
PD3	10	0.833333	0.375	0.875			D3D8	10	0.540541	0.0540541	0.513514
PD3	10	0.724138	0.103448	0.689655			D3D8	10	0.515152	0.0540541	0.515152
PD3	10	0.590909	0.1875	0.590909			D3D8	10	0.577778	0	0.622222
	Average	0.63291	0.226013	0.720584				Average	0.614911	0.207517	0.719124
	St. Deviation	0.144713	0.131882	0.138743				St. Deviation	0.120116	0.147181	0.149965
	Total Number Steps	87	87	87				Total Number Steps	87	87	87
	# of steps outside 2 S.D.	30	43	41				# of steps outside 2 S.D.	24	38	33

## Sheet: Pre-SCI Spatiotemporal
Time point	Animal ID	Swing Time	Stance Time	Stride Time	Stride Frequency	Stride Distance	Speed			Time point	Animal ID	Swing Time	Stance Time	Stride Time	Stride Frequency	Stride Distance	Speed
BL	2	0.11	0.11	0.22	4.54545	21.3247	96.9306			D1D5	2	0.13	0.2	0.33	3.0303	16.9041	51.2245
BL	2	0.13	0.03	0.16	6.25	20.7793	129.871			D1D5	2	0.13	0.18	0.31	3.22581	19.3458	62.4058
BL	2	0.12	0.1	0.22	4.54545	19.1101	86.8642			D1D5	2	0.12	0.13	0.25	4	20.7987	83.1948
BL	2	0.11	0.15	0.26	3.84615	18.5086	71.187			D1D5	2	0.16	0.13	0.29	3.44828	21.1702	73.0006
BL	2	0.11	0.09	0.2	5	19.101	95.505			D1D5	2	0.14	0.13	0.27	3.7037	21.7065	80.3944
BL	2	0.12	0.12	0.24	4.16667	20.027	83.4457			D1D5	2	0.14	0.11	0.25	4	21.917	87.6682
BL	2	0.13	0.1	0.23	4.34783	19.3243	84.0188			D1D5	2	0.14	0.15	0.29	3.44828	23.3073	80.37
BL	2	0.12	0.1	0.22	4.54545	20.6129	93.6948			D1D5	2	0.15	0.13	0.28	3.57143	23.0753	82.4118
BL	2	0.12	0.16	0.28	3.57143	18.4573	65.9188			D1D5	2	0.14	0.12	0.26	3.84615	21.188	81.4924
BL	2	0.11	0.12	0.23	4.34783	19.8025	86.0978			D1D5	2	0.14	0.13	0.27	3.7037	20.391	75.5223
BL	2	0.09	0.16	0.25	4	17.2191	68.8763			D1D5	2	0.13	0.12	0.25	4	21.523	86.0922
BL	2	0.11	0.13	0.24	4.16667	21.3219	88.8411			D1D5	2	0.14	0.12	0.26	3.84615	23.3501	89.8082
BL	2	0.12	0.21	0.33	3.0303	18.807	56.991			D1D5	2	0.13	0.11	0.24	4.16667	22.1874	92.4474
BL	2	0.12	0.12	0.24	4.16667	18.5922	77.4675			D1D5	2	0.13	0.11	0.24	4.16667	23.6277	98.4489
BL	2	0.18	0.19	0.37	2.7027	14.9207	40.3262			D1D5	5	0.15	0.16	0.31	3.22581	18.0845	58.3371
BL	5	0.12	0.23	0.35	2.85714	15.5418	64.2393			D1D5	5	0.16	0.22	0.38	2.63158	20.2958	53.4099
BL	5	0.11	0.16	0.27	3.7037	17.3446	51.1044			D1D5	5	0.18	0.19	0.37	2.7027	19.6924	53.2226
BL	5	0.12	0.11	0.23	4.34783	19.763	85.9262			D1D5	5	0.17	0.27	0.44	2.27273	17.3882	39.5187
BL	5	0.11	0.13	0.24	4.16667	19.8253	82.6055			D1D5	5	0.14	0.28	0.42	2.38095	13.8844	33.0581
BL	5	0.12	0.12	0.24	4.16667	17.4403	69.908			D1D5	5	0.17	0.2	0.37	2.7027	17.0436	46.0638
BL	5	0.16	0.15	0.31	3.22581	16.4065	62.2867			D1D5	5	0.15	0.25	0.4	2.5	17.0713	42.6781
BL	5	0.13	0.12	0.25	4	21.1558	84.6231			D1D5	5	0.13	0.18	0.31	3.22581	16.4301	53.0004
BL	5	0.12	0.11	0.23	4.34783	18.7277	81.4249			D1D5	5	0.15	0.17	0.32	3.125	14.9163	46.6134
BL	5	0.13	0.19	0.32	3.125	17.4619	54.5683			D1D5	5	0.15	0.18	0.33	3.0303	19.566	59.2908
BL	5	0.14	0.11	0.25	4	17.4483	79.3103			D1D5	5	0.19	0.16	0.35	2.85714	20.5622	58.7491
BL	5	0.13	0.12	0.25	4	20.5722	85.7176			D1D5	5	0.16	0.11	0.27	3.7037	19.6095	72.6277
BL	5	0.13	0.16	0.29	3.44828	19.5369	67.3687			D1D5	5	0.15	0.14	0.29	3.44828	20.1275	69.4052
BL	5	0.11	0.12	0.23	4.34783	19.8709	86.3954			D1D5	5	0.13	0.23	0.36	2.77778	15.2096	42.2488
BL	5	0.14	0.15	0.29	3.44828	19.6365	67.7119			D1D5	10	0.18	0.2	0.38	2.63158	18.5222	48.7426
BL	5	0.12	0.21	0.33	3.0303	17.8333	54.0403			D1D5	10	0.17	0.21	0.38	2.63158	17.4263	45.8587
BL	10	0.12	0.14	0.26	3.84615	19.4419	74.7766			D1D5	10	0.15	0.19	0.34	2.94118	18.1969	53.5203
BL	10	0.13	0.12	0.25	4	19.0903	76.3612			D1D5	10	0.15	0.14	0.29	3.44828	14.2825	49.2499
BL	10	0.11	0.14	0.25	4	15.6441	62.5765			D1D5	10	0.16	0.19	0.35	2.85714	19.9432	56.9804
BL	10	0.12	0.13	0.25	4	16.3464	65.3856			D1D5	10	0.17	0.16	0.33	3.0303	20.0271	60.6883
BL	10	0.12	0.18	0.3	3.33333	13.8377	46.1256			D1D5	10	0.17	0.25	0.42	2.38095	19.9177	47.423
BL	10	0.12	0.2	0.32	3.125	14.4286	45.0894			D1D5	10	0.14	0.14	0.28	3.57143	19.7146	70.4092
BL	10	0.11	0.12	0.23	4.34783	17.0672	74.2051			D1D5	10	0.14	0.11	0.25	4	21.0195	84.0778
BL	10	0.1	0.12	0.22	4.54545	17.7672	80.76			D1D5	10	0.15	0.08	0.23	4.34783	18.4612	80.2659
BL	10	0.1	0.12	0.22	4.54545	16.9507	77.0488			D1D5	10	0.19	0.13	0.32	3.125	23.6786	73.9957
BL	10	0.14	0.15	0.29	3.44828	18.397	63.4379			D1D5	10	0.19	0.23	0.42	2.38095	17.8991	42.6168
BL	10	0.14	0.17	0.31	3.22581	16.6249	53.6286			D1D5	10	0.19	0.21	0.4	2.5	12.8245	32.0611
BL	10	0.11	0.13	0.24	4.16667	18.6328	77.6368			D1D5	10	0.13	0.21	0.34	2.94118	16.9669	49.9026
BL	10	0.12	0.12	0.24	4.16667	18.9821	79.0921			D1D5	10	0.14	0.15	0.29	3.44828	20.538	70.8209
BL	10	0.14	0.13	0.27	3.7037	15.768	58.3999			D1D5	13	0.17	0.2	0.37	2.7027	20.348	54.9947
BL	10	0.15	0.14	0.29	3.44828	20.4535	70.5292			D1D5	13	0.16	0.19	0.35	2.85714	20.2534	57.8668
BL	13	0.13	0.15	0.28	3.57143	18.3155	65.4126			D1D5	13	0.23	0.26	0.49	2.04082	18.2131	37.1696
BL	13	0.13	0.2	0.33	3.0303	18.5636	56.2533			D1D5	13	0.16	0.22	0.38	2.63158	19.7153	51.8825
BL	13	0.13	0.1	0.23	4.34783	19.4469	84.5516			D1D5	13	0.19	0.19	0.38	2.63158	19.522	51.3738
BL	13	0.13	0.14	0.27	3.7037	20.994	77.7556			D1D5	13	0.2	0.19	0.39	2.5641	17.9661	46.0668
BL	13	0.11	0.22	0.33	3.0303	18.6225	56.4318			D1D5	13	0.19	0.25	0.44	2.27273	17.9123	40.7098
BL	13	0.12	0.15	0.27	3.7037	20.9971	77.767			D1D5	13	0.16	0.22	0.38	2.63158	17.1118	45.031
BL	13	0.14	0.22	0.36	2.77778	20.0271	55.6309			D1D5	13	0.17	0.27	0.44	2.27273	17.9631	40.8253
BL	13	0.15	0.15	0.3	3.33333	20.2624	67.5413			D1D5	13	0.2	0.25	0.45	2.22222	17.2369	38.3042
BL	13	0.14	0.13	0.27	3.7037	18.5058	68.54			D1D5	13	0.14	0.18	0.32	3.125	15.1666	47.3957
BL	13	0.15	0.14	0.29	3.44828	21.266	73.3309			D1D5	13	0.19	0.22	0.41	2.43902	14.5827	35.5675
BL	13	0.13	0.26	0.39	2.5641	15.9465	40.8885			D1D5	13	0.21	0.26	0.47	2.12766	18.9073	40.2282
BL	13	0.13	0.16	0.29	3.44828	19.2182	66.2696			D1D8	2	0.15	0.11	0.26	3.84615	23.5869	90.7189
BL	13	0.12	0.13	0.25	4	19.9116	79.6465			D1D8	2	0.13	0.1	0.23	4.34783	22.3728	97.2732
BL	13	0.13	0.16	0.29	3.44828	16.6943	57.5667			D1D8	2	0.14	0.11	0.25	4	21.9531	87.8123
PD1	2	0.08	0.12	0.2	5	16.9098	84.5488			D1D8	2	0.13	0.1	0.23	4.34783	22.8606	99.394
PD1	2	0.1	0.13	0.23	4.34783	17.2156	74.8502			D1D8	2	0.17	0.13	0.3	3.33333	21.64	72.1334
PD1	2	0.1	0.16	0.26	3.84615	14.9198	57.3838			D1D8	2	0.15	0.13	0.28	3.57143	20.7029	73.9388
PD1	2	0.1	0.12	0.22	4.54545	17.023	77.3772			D1D8	2	0.15	0.19	0.34	2.94118	14.9816	44.0637
PD1	2	0.09	0.14	0.23	4.34783	19.3645	84.1935			D1D8	2	0.17	0.21	0.38	2.63158	16.9086	44.4962
PD1	2	0.11	0.14	0.25	4	17.3739	69.4954			D1D8	2	0.16	0.11	0.27	3.7037	20.8643	77.2751
PD1	2	0.1	0.13	0.23	4.34783	18.8754	82.0669			D1D8	2	0.17	0.15	0.32	3.125	21.6651	67.7033
PD1	2	0.11	0.14	0.25	4	15.6433	62.5731			D1D8	2	0.15	0.13	0.28	3.57143	20.0761	71.7003
PD1	2	0.1	0.15	0.25	4	16.0441	64.1763			D1D8	2	0.16	0.11	0.27	3.7037	22.8102	84.4821
PD1	2	0.1	0.1	0.2	5	20.4955	102.477			D1D8	2	0.12	0.18	0.3	3.33333	17.2286	57.4286
PD1	2	0.12	0.08	0.2	5	20.5939	102.969			D1D8	2	0.14	0.19	0.33	3.0303	21.468	65.0546
PD1	2	0.09	0.09	0.18	5.55556	19.7608	109.782			D1D8	5	0.14	0.11	0.25	4	22.1201	88.4805
PD1	2	0.1	0.13	0.23	4.34783	18.5725	80.7498			D1D8	5	0.13	0.1	0.23	4.34783	21.4939	93.4516
PD1	2	0.09	0.13	0.22	4.54545	19.4424	88.3744			D1D8	5	0.12	0.16	0.28	3.57143	19.4066	69.3093
PD1	5	0.12	0.15	0.27	3.7037	20.4662	75.8008			D1D8	5	0.14	0.15	0.29	3.44828	20.5436	70.8399
PD1	5	0.11	0.14	0.25	4	19.0838	76.3352			D1D8	5	0.17	0.19	0.36	2.77778	13.8848	38.569
PD1	5	0.12	0.19	0.31	3.22581	15.9338	51.3995			D1D8	5	0.12	0.18	0.3	3.33333	15.8802	52.9338
PD1	5	0.11	0.15	0.26	3.84615	19.4914	74.9669			D1D8	5	0.17	0.13	0.3	3.33333	20.7992	69.3308
PD1	5	0.12	0.13	0.25	4	18.8638	75.4554			D1D8	5	0.15	0.29	0.44	2.27273	13.8739	31.5317
PD1	5	0.09	0.24	0.33	3.0303	14.2181	43.085			D1D8	5	0.14	0.21	0.35	2.85714	15.9429	45.5512
PD1	5	0.13	0.16	0.29	3.44828	13.6273	46.9909			D1D8	5	0.14	0.16	0.3	3.33333	16.5588	55.1959
PD1	5	0.11	0.15	0.26	3.84615	18.5285	71.2635			D1D8	5	0.19	0.23	0.42	2.38095	14.0325	33.4108
PD1	5	0.11	0.11	0.22	4.54545	20.5124	93.2384			D1D8	5	0.19	0.18	0.37	2.7027	23.0583	62.3196
PD1	5	0.13	0.11	0.24	4.16667	21.8966	91.2357			D1D8	5	0.14	0.17	0.31	3.22581	18.9725	61.2017
PD1	5	0.1	0.22	0.32	3.125	16.2818	50.8806			D1D8	5	0.17	0.14	0.31	3.22581	20.0807	64.7765
PD1	5	0.1	0.15	0.25	4	17.511	70.0439			D1D8	10	0.16	0.14	0.3	3.33333	22.1078	73.6928
PD1	5	0.14	0.12	0.26	3.84615	19.9584	76.7629			D1D8	10	0.13	0.18	0.31	3.22581	19.4136	62.6246
PD1	5	0.13	0.16	0.29	3.44828	18.5892	64.1009			D1D8	10	0.14	0.12	0.26	3.84615	21.9101	84.2698
PD1	10	0.1	0.14	0.24	4.16667	15.4073	64.1969			D1D8	10	0.14	0.12	0.26	3.84615	20.4286	78.5715
PD1	10	0.11	0.13	0.24	4.16667	18.6531	77.7213			D1D8	10	0.16	0.12	0.28	3.57143	20.1827	72.0809
PD1	10	0.11	0.11	0.22	4.54545	17.4744	79.4291			D1D8	10	0.14	0.2	0.34	2.94118	13.1155	38.5749
PD1	10	0.1	0.11	0.21	4.7619	19.8823	94.6778			D1D8	10	0.16	0.18	0.34	2.94118	21.4526	63.0958
PD1	10	0.12	0.11	0.23	4.34783	17.3996	75.6504			D1D8	10	0.12	0.14	0.26	3.84615	18.3761	70.6774
PD1	10	0.12	0.11	0.23	4.34783	19.9881	86.9049			D1D8	10	0.13	0.13	0.26	3.84615	20.1405	77.4634
PD1	10	0.11	0.09	0.2	5	19.4133	97.0666			D1D8	10	0.17	0.12	0.29	3.44828	17.0616	58.833
PD1	10	0.12	0.16	0.28	3.57143	15.8864	56.7371			D1D8	10	0.13	0.18	0.31	3.22581	12.0053	38.7268
PD1	10	0.11	0.19	0.3	3.33333	15.4061	51.3535			D1D8	10	0.21	0.24	0.45	2.22222	15.6371	34.7492
PD1	10	0.08	0.17	0.25	4	13.815	55.2599			D1D8	10	0.14	0.17	0.31	3.22581	19.3826	62.5246
PD1	10	0.11	0.07	0.18	5.55556	22.6801	126.001			D1D8	10	0.14	0.14	0.28	3.57143	18.4169	65.7746
PD1	10	0.09	0.08	0.17	5.88235	21.2241	124.848			D1D8	10	0.17	0.23	0.4	2.5	18.5002	46.2505
PD1	10	0.1	0.08	0.18	5.55556	21.8113	121.174			D1D8	13	0.15	0.17	0.32	3.125	17.3567	54.2398
PD1	13	0.12	0.18	0.3	3.33333	19.5618	65.206			D1D8	13	0.15	0.18	0.33	3.0303	19.1777	58.1142
PD1	13	0.13	0.16	0.29	3.44828	19.0078	65.5441			D1D8	13	0.17	0.09	0.26	3.84615	21.4499	82.4995
PD1	13	0.12	0.19	0.31	3.22581	19.2816	62.1986			D1D8	13	0.15	0.14	0.29	3.44828	21.9084	75.5464
PD1	13	0.08	0.2	0.28	3.57143	13.5907	48.5382			D1D8	13	0.16	0.19	0.35	2.85714	21.1077	60.3077
PD1	13	0.11	0.19	0.3	3.33333	14.8323	49.4412			D1D8	13	0.18	0.09	0.27	3.7037	23.157	85.7668
PD1	13	0.14	0.17	0.31	3.22581	19.0635	61.495			D1D8	13	0.15	0.11	0.26	3.84615	19.7266	75.8717
PD1	13	0.13	0.16	0.29	3.44828	20.4113	70.3837			D1D8	13	0.17	0.12	0.29	3.44828	22.1848	76.4992
PD1	13	0.12	0.15	0.27	3.7037	18.8157	69.6879			D1D8	13	0.14	0.14	0.28	3.57143	20.6541	73.7646
PD1	13	0.11	0.17	0.28	3.57143	15.8762	56.7009			D1D8	13	0.13	0.15	0.28	3.57143	22.3483	79.8155
PD1	13	0.1	0.21	0.31	3.22581	18.6477	56.1593			D1D8	13	0.11	0.13	0.24	4.16667	21.6583	90.2427
PD1	13	0.12	0.19	0.31	3.22581	17.4094	46.486
PD1	13	0.09	0.23	0.32	3.125	15.1514	51.488
PD1	13	0.13	0.22	0.35	2.85714	14.8755	55.3706
PostD1	2	0.12	0.15	0.27	3.7037	20.1105	74.4833
PostD1	2	0.13	0.14	0.27	3.7037	18.2595	67.6279
PostD1	2	0.15	0.12	0.27	3.7037	22.9987	85.1802
PostD1	2	0.15	0.21	0.36	2.77778	18.9181	52.5502
PostD1	2	0.13	0.18	0.31	3.22581	15.5231	50.0746
PostD1	2	0.14	0.16	0.3	3.33333	19.3637	64.5458
PostD1	2	0.13	0.12	0.25	4	19.4222	77.6888
PostD1	2	0.12	0.12	0.24	4.16667	19.568	81.5332
PostD1	2	0.14	0.2	0.34	2.94118	17.1137	50.3346
PostD1	2	0.12	0.15	0.27	3.7037	20.7035	76.6795
PostD1	2	0.13	0.12	0.25	4	22.287	89.148
PostD1	5	0.14	0.23	0.37	2.7027	19.6271	53.0461
PostD1	5	0.14	0.14	0.28	3.57143	21.928	78.3145
PostD1	5	0.16	0.22	0.38	2.63158	18.8116	49.5043
PostD1	5	0.16	0.22	0.38	2.63158	18.2077	47.9149
PostD1	5	0.16	0.2	0.36	2.77778	19.5624	54.3401
PostD1	5	0.14	0.27	0.41	2.43902	17.2218	42.0044
PostD1	5	0.14	0.26	0.4	2.5	18.864	47.16
PostD1	5	0.14	0.15	0.29	3.44828	21.2342	73.2213
PostD1	5	0.13	0.17	0.3	3.33333	19.9563	66.5211
PostD1	5	0.15	0.14	0.29	3.44828	21.1229	72.8376
PostD1	5	0.14	0.14	0.28	3.57143	22.3611	79.8611
PostD1	5	0.14	0.11	0.25	4	22.6721	90.6883
PostD1	5	0.15	0.16	0.31	3.22581	17.6915	57.0694
PostD1	5	0.14	0.13	0.27	3.7037	19.2365	71.2463
PostD1	5	0.16	0.14	0.3	3.33333	21.3516	71.1722
PostD1	10	0.11	0.15	0.26	3.84615	15.8131	60.8197
PostD1	10	0.12	0.15	0.27	3.7037	20.4721	75.8224
PostD1	10	0.13	0.21	0.34	2.94118	15.3478	45.1407
PostD1	10	0.16	0.17	0.33	3.0303	18.5991	56.361
PostD1	10	0.15	0.15	0.3	3.33333	14.6526	48.8422
PostD1	10	0.18	0.14	0.32	3.125	17.8831	55.8846
PostD1	10	0.13	0.17	0.3	3.33333	17.2414	57.4714
PostD1	10	0.14	0.1	0.24	4.16667	19.3564	80.6515
PostD1	10	0.18	0.15	0.33	3.0303	21.5881	65.4185
PostD1	10	0.15	0.17	0.32	3.125	20.4667	63.9584
PostD1	10	0.16	0.33	0.49	2.04082	15.453	31.5367
PostD1	13	0.19	0.19	0.38	2.63158	20.9114	55.0301
PostD1	13	0.18	0.22	0.4	2.5	19.9369	49.8423
PostD1	13	0.17	0.33	0.5	2	15.7184	31.4367
PostD1	13	0.17	0.49	0.66	1.51515	16.8088	25.4679
PostD1	13	0.13	0.16	0.29	3.44828	19.028	65.6139
PostD1	13	0.14	0.17	0.31	3.22581	20.8275	67.1853
PostD1	13	0.17	0.22	0.39	2.5641	19.5113	50.0291
PostD1	13	0.16	0.24	0.4	2.5	13.672	34.18
PostD1	13	0.12	0.19	0.31	3.22581	16.6884	53.8335
PostD1	13	0.13	0.19	0.32	3.125	17.9332	56.0412

## Sheet: Post-SCI Spatiotemporal
Time point	Animal ID	Swing Time	Stance Time	Stride Time	Stride Frequency	Stride Distance	Speed			Time point	Animal ID	Swing Time	Stance Time	Stride Time	Stride Frequency	Stride Distance	Speed
PD2	2	0.03	0.08	0.11	9.09091	15.5816	59.8228			D2D8	2	0.1	0.24	0.34	2.94118	17.8537	52.511
PD2	2	0.02	0.06	0.08	12.5	7.38578	70.8256			D2D8	2	0.11	0.17	0.28	3.57143	19.5784	69.9229
PD2	2	0.04	0.13	0.17	5.88235	23.3064	67.1434			D2D8	2	0.12	0.2	0.32	3.125	17.4145	54.4203
PD2	2	0.06	0.16	0.22	4.54545	13.2887	95.781			D2D8	2	0.1	0.22	0.32	3.125	17.4941	54.6691
PD2	2	0.11	0.14	0.25	4	21.0718	45.1986			D2D8	2	0.08	0.25	0.33	3.0303	11.8399	35.8784
PD2	2	0.1	0.15	0.25	4	27.9797	67.9815			D2D8	2	0.05	0.17	0.22	4.54545	13.4897	61.3169
PD2	2	0.04	0.14	0.18	5.55556	11.2997	107.702			D2D8	2	0.07	0.17	0.24	4.16667	17.0046	70.8524
PD2	2	0.05	0.21	0.26	3.84615	12.8655	72.1459			D2D8	2	0.1	0.15	0.25	4	16.709	66.8361
PD2	2	0.05	0.17	0.22	4.54545	11.9267	72.0005			D2D8	2	0.04	0.15	0.19	5.26316	9.94654	52.3502
PD2	2	0.05	0.17	0.22	4.54545	14.9559	83.8611			D2D8	2	0.06	0.18	0.24	4.16667	12.6711	52.7963
PD2	2	0.05	0.14	0.19	5.26316	10.4945	65.0594			D2D8	2	0.14	0.22	0.36	2.77778	22.0323	61.2008
PD2	2	0.02	0.2	0.22	4.54545	8.18404	67.5381			D2D8	2	0.09	0.19	0.28	3.57143	17.1549	61.2674
PD2	2	0.04	0.18	0.22	4.54545	20.4634	59.3526			D2D8	2	0.1	0.15	0.25	4	18.2072	72.8287
PD2	2	0.06	0.22	0.28	3.57143	20.4709	76.6077			D2D8	2	0.09	0.18	0.27	3.7037	14.4943	53.6825
PD2	2	0.06	0.11	0.17	5.88235	19.4794	61.9297			D2D8	2	0.11	0.17	0.28	3.57143	15.6485	55.8874
PD2	5	0.09	0.25	0.34	2.94118	13.9589	41.0556			D2D8	5	0.09	0.3	0.39	2.5641	16.7422	42.9286
PD2	5	0.08	0.15	0.23	4.34783	13.1646	57.2375			D2D8	5	0.13	0.26	0.39	2.5641	20.919	53.6384
PD2	5	0.06	0.1	0.16	6.25	16.8463	73.2446			D2D8	5	0.19	0.56	0.75	1.33333	16.1622	21.5497
PD2	5	0.08	0.2	0.28	3.57143	19.6569	70.2031			D2D8	5	0.12	0.58	0.7	1.42857	17.4936	24.9908
PD2	5	0.1	0.14	0.24	4.16667	19.5768	81.57			D2D8	5	0.06	0.21	0.27	3.7037	11.2043	41.4975
PD2	5	0.09	0.21	0.3	3.33333	16.4485	54.8284			D2D8	5	0.14	0.27	0.41	2.43902	20.402	42.5042
PD2	5	0.04	0.14	0.18	5.55556	17.9024	55.9451			D2D8	5	0.07	0.07	0.14	7.14286	9.25043	27.2071
PD2	5	0.19	0.25	0.44	2.27273	17.8965	59.6549			D2D8	5	0.22	0.24	0.46	2.17391	22.7832	49.5287
PD2	5	0.07	0.24	0.31	3.22581	13.1657	42.4701			D2D8	5	0.16	0.42	0.58	1.72414	22.885	39.4568
PD2	5	0.1	0.2	0.3	3.33333	20.1029	67.0096			D2D8	5	0.17	0.25	0.42	2.38095	21.14	50.3332
PD2	5	0.11	0.2	0.31	3.22581	18.7565	60.5048			D2D8	5	0.03	0.16	0.19	5.26316	9.1246	48.0242
PD2	5	0.09	0.2	0.29	3.44828	15.8158	54.5373			D2D8	5	0.03	0.07	0.1	10	5.25614	52.5614
PD2	5	0.08	0.24	0.32	3.125	18.6866	58.3955			D2D8	5	0.14	0.37	0.51	1.96078	22.0241	43.1846
PD2	5	0.03	0.1	0.13	7.69231	10.2034	78.4878			D2D8	5	0.05	0.14	0.19	5.26316	13.4432	70.7536
PD2	5	0.03	0.08	0.11	9.09091	18.7565	57.3976			D2D8	10	0.1	0.23	0.33	3.0303	17.0874	51.78
PD2	10	0.05	0.32	0.37	2.7027	7.18974	19.4317			D2D8	10	0.13	0.26	0.39	2.5641	14.6214	37.4907
PD2	10	0.07	0.22	0.29	3.44828	13.4594	46.4116			D2D8	10	0.1	0.25	0.35	2.85714	15.11	43.1715
PD2	10	0.09	0.26	0.35	2.85714	11.6901	33.4002			D2D8	10	0.09	0.25	0.34	2.94118	14.556	42.8118
PD2	10	0.06	0.17	0.23	4.34783	9.7633	42.4491			D2D8	10	0.08	0.23	0.31	3.22581	12.6706	40.8728
PD2	10	0.07	0.17	0.24	4.16667	11.9463	49.7762			D2D8	10	0.16	0.44	0.6	1.66667	8.33625	13.8937
PD2	10	0.1	0.18	0.28	3.57143	11.0853	39.5905			D2D8	10	0.07	0.19	0.26	3.84615	10.9286	42.0332
PD2	10	0.15	0.22	0.37	2.7027	17.5248	47.3643			D2D8	10	0.18	0.43	0.61	1.63934	10.4177	17.0782
PD2	10	0.1	0.18	0.28	3.57143	8.31803	29.7072			D2D8	10	0.05	0.23	0.28	3.57143	7.35969	26.2846
PD2	10	0.08	0.2	0.28	3.57143	10.5909	37.8248			D2D8	10	0.06	0.29	0.35	2.85714	10.6237	30.3535
PD2	10	0.05	0.18	0.23	4.34783	11.2009	48.6997			D2D8	10	0.05	0.27	0.32	3.125	9.70605	30.3314
PD2	10	0.07	0.17	0.24	4.16667	13.3053	55.4386			D2D8	10	0.07	0.32	0.39	2.5641	12.4145	31.8321
PD2	10	0.04	0.47	0.51	1.96078	10.3174	20.2302			D2D8	10	0.12	0.36	0.48	2.08333	11.9408	24.8766
PD2	10	0.08	0.21	0.29	3.44828	12.6225	43.5258			D2D8	10	0.08	0.26	0.34	2.94118	11.9863	35.2539
PD3	2	0.08	0.14	0.26	3.84615	9.49287	43.1494			D3D8	2	0.12	0.16	0.28	3.57143	18.6393	66.5688
PD3	2	0.15	0.18	0.36	2.77778	16.6957	50.5931			D3D8	2	0.08	0.18	0.26	3.84615	14.0912	54.1968
PD3	2	0.11	0.21	0.29	3.44828	19.2241	60.0753			D3D8	2	0.12	0.16	0.28	3.57143	17.6394	62.9978
PD3	2	0.1	0.18	0.33	3.0303	14.8181	52.9216			D3D8	2	0.12	0.2	0.32	3.125	19.7823	61.8197
PD3	2	0.09	0.23	0.28	3.57143	11.2789	43.3803			D3D8	2	0.12	0.18	0.3	3.33333	19.6047	65.349
PD3	2	0.11	0.19	0.27	3.7037	14.4768	45.2401			D3D8	2	0.12	0.15	0.27	3.7037	17.1122	63.3785
PD3	2	0.05	0.16	0.3	3.33333	17.3186	57.7287			D3D8	2	0.11	0.21	0.32	3.125	13.8884	43.4013
PD3	2	0.07	0.25	0.21	4.7619	11.3894	35.592			D3D8	2	0.13	0.2	0.33	3.0303	16.4127	49.7355
PD3	2	0.1	0.14	0.28	3.57143	15.1999	63.3331			D3D8	2	0.12	0.24	0.36	2.77778	13.8653	38.5147
PD3	2	0.11	0.18	0.25	4	17.3882	59.9594			D3D8	2	0.08	0.32	0.4	2.5	15.3063	38.2656
PD3	2	0.06	0.14	0.22	4.54545	12.58	62.9			D3D8	2	0.09	0.18	0.27	3.7037	17.1969	63.6922
PD3	2	0.04	0.16	0.21	4.7619	10.5606	52.8028			D3D8	2	0.08	0.19	0.27	3.7037	15.4657	57.2802
PD3	2	0.14	0.17	0.29	3.44828	19.8537	64.0441			D3D8	2	0.1	0.23	0.33	3.0303	15.2122	46.0975
PD3	2	0.09	0.15	0.38	2.63158	14.1581	58.9923			D3D8	2	0.11	0.19	0.3	3.33333	17.5193	58.3977
PD3	5	0.13	0.29	0.42	2.38095	17.7871	42.3502			D3D8	5	0.09	0.09	0.18	5.55556	13.276	44.2532
PD3	5	0.15	0.3	0.45	2.22222	20.3177	45.1504			D3D8	5	0.13	0.13	0.26	3.84615	20.4829	56.8969
PD3	5	0.12	0.23	0.35	2.85714	23.3495	66.7129			D3D8	5	0.08	0.08	0.16	6.25	14.5	63.0435
PD3	5	0.12	0.19	0.31	3.22581	15.8962	52.9874			D3D8	5	0.1	0.1	0.2	5	18.7084	64.5116
PD3	5	0.13	0.29	0.42	2.38095	20.6131	49.0789			D3D8	5	0.11	0.11	0.22	4.54545	21.0523	75.1867
PD3	5	0.14	0.22	0.36	2.77778	22.1244	61.4567			D3D8	5	0.16	0.16	0.32	3.125	17.1363	39.8518
PD3	5	0.09	0.26	0.35	2.85714	17.6601	50.4574			D3D8	5	0.19	0.19	0.38	2.63158	20.2073	42.0986
PD3	5	0.12	0.24	0.36	2.77778	23.7779	66.0498			D3D8	5	0.13	0.13	0.26	3.84615	17.4689	56.3513
PD3	5	0.1	0.22	0.32	3.125	35.5601	111.125			D3D8	5	0.12	0.12	0.24	4.16667	16.5004	61.1126
PD3	5	0.16	0.2	0.36	2.77778	20.6458	57.3495			D3D8	5	0.06	0.06	0.12	8.33333	6.87725	20.178
PD3	5	0.12	0.19	0.31	3.22581	16.6049	79.0711			D3D8	5	0.15	0.15	0.3	3.33333	21.4176	49.8084
PD3	5	0.04	0.17	0.21	4.7619	8.83754	42.0835			D3D8	5	0.11	0.11	0.22	4.54545	15.8766	49.6144
PD3	5	0.1	0.38	0.48	2.08333	14.5109	30.2311			D3D8	5	0.05	0.05	0.1	10	18.9479	55.729
PD3	5	0.05	0.3	0.35	2.85714	11.1252	31.7863			D3D8	5	0.02	0.02	0.04	25	9.32121	42.3691
PD3	5	0.12	0.25	0.37	2.7027	19.0183	51.4008			D3D8	5	0.03	0.03	0.06	16.6667	2.00292	50.073
PD3	10	0.06	0.22	0.28	3.57143	11.6904	41.7516			D3D8	10	0.14	0.2	0.34	2.94118	11.0773	32.5803
PD3	10	0.15	0.26	0.41	2.43902	14.7157	35.8921			D3D8	10	0.15	0.25	0.4	2.5	13.9102	34.7754
PD3	10	0.08	0.2	0.28	3.57143	13.8129	49.3318			D3D8	10	0.12	0.18	0.3	3.33333	14.8721	49.5735
PD3	10	0.12	0.27	0.39	2.5641	14.1212	36.2082			D3D8	10	0.09	0.18	0.27	3.7037	14.2046	52.6095
PD3	10	0.09	0.25	0.34	2.94118	11.1011	32.6502			D3D8	10	0.08	0.16	0.24	4.16667	12.5154	52.1473
PD3	10	0.03	0.15	0.18	5.55556	5.21338	28.9632			D3D8	10	0.09	0.18	0.27	3.7037	14.094	52.2002
PD3	10	0.06	0.2	0.26	3.84615	10.544	40.5538			D3D8	10	0.12	0.15	0.27	3.7037	16.4845	61.0537
PD3	10	0.12	0.26	0.38	2.63158	14.2165	37.4119			D3D8	10	0.15	0.12	0.27	3.7037	15.8803	58.8159
PD3	10	0.13	0.25	0.38	2.63158	13.2435	34.8512			D3D8	10	0.09	0.19	0.28	3.57143	13.0627	46.6524
PD3	10	0.06	0.23	0.29	3.44828	8.05334	27.7701			D3D8	10	0.09	0.18	0.27	3.7037	11.4182	42.2895
PD3	10	0.08	0.27	0.35	2.85714	13.435	38.3856			D3D8	10	0.07	0.25	0.32	3.125	9.51821	29.7444
PD3	10	0.06	0.2	0.26	3.84615	12.1445	46.7096			D3D8	10	0.01	0.11	0.12	8.33333	2.19336	18.278
PD3	10	0.05	0.19	0.24	4.16667	10.783	44.9293			D3D8	10	0.12	0.25	0.37	2.7027	13.1449	35.5268
PD3	10	0.13	0.16	0.29	3.44828	14.0744	48.5325			D3D8	10	0.13	0.2	0.33	3.0303	14.0536	42.5866
PD3	10	0.08	0.14	0.22	4.54545	10.1378	46.0811			D3D8	10	0.21	0.24	0.45	2.22222	10.3589	23.0198
