# Supplementary material for: Silencing long ascending propriospinal neurons after spinal cord injury improves hindlimb stepping in the adult rat
Source: eLife. 2021 Dec 2;10:e70058. doi: 10.7554/eLife.70058 (PMC8639151; doi:10.7554/eLife.70058)
Supplement: Figure 6—source data 1. [file elife-70058-fig6-data1.xlsx]

## Sheet: Dorsal Step Index
Animal ID	Control Avg DSI	Dox Avg DSI			Animal ID	Control Time Point	DSI Score			Animal ID	Dox Time Point	DSI Score
1	23.0392	8.14137			1	PD2	29.4118			1	D2D5	4.87805
3	3.17304	6.83172			1	PD3	16.6667			1	D2D8	2.43902
*4					3	PD2	4.65116			1	D3D8	4.87805
6	19.8039	8.99059			3	PD3	1.69492			1	D3D20	20.3704
7	29.0806	8.98739			4	PD2	0			3	D2D5	3.44828
9	27.1212	14.5809			4	PD3	0			3	D2D8	5.40541
11	20.9884	16.6961			6	PD2	19.6078			3	D3D8	2.5641
12	55.0843	22.9526			6	PD3	20			3	D3D20	15.9091
14	17.0238	6.78987			7	PD2	19.1781			4	D2D5	0
*15					7	PD3	38.9831			4	D2D8	0
Average	24.4143	11.7463			9	PD2	37.8788			4	D3D8	0
St Deviation	14.6894	5.79454			9	PD3	16.3636			4	D3D20	0
					11	PD2	20.4082			6	D2D5	13.1579
*=never exhibited dorsal steps, values = 0 for Control and Dox time points					11	PD3	21.5686			6	D2D8	6.97674
					12	PD2	45			6	D3D8	7.31707
					12	PD3	65.1685			6	D3D20	8.51064
					14	PD2	25.7143			7	D2D5	12.2807
					14	PD3	8.33333			7	D2D8	2.63158
					15	PD2	0			7	D3D8	5.12821
					15	PD3	0			7	D3D20	15.9091
										9	D2D5	21.4286
										9	D2D8	18
										9	D3D8	9.09091
										9	D3D20	9.80392
										11	D2D5	17.1875
										11	D2D8	24.3902
										11	D3D8	8.51064
										12	D2D5	23.5294
										12	D2D8	30.4348
										12	D3D8	14.8936
										14	D2D5	17.8571
										14	D2D8	0
										14	D3D8	0
										14	D3D20	9.30233
										15	D2D5	0
										15	D2D8	0
										15	D3D8	0
										15	D3D20	0

## Sheet: Dorsal Step Sidedness
Control	Animal ID	Side	Percentage			Dox	Animal ID	Side	Percentage
	1	Right	0.325				1	Right	0.340909
	3	Right	0.5				3	Right	0.482143
	6	Right	0.2				6	Right	0.279165
	7	Right	0.678744				7	Right	0.833333
	9	Right	0.391111				9	Right	0.734722
	11	Right	0.809091				11	Right	0.925
	12	Right	0.803783				12	Right	0.494043
	14	Right	0.833333				14	Right	0.75
		Average	0.567633					Average	0.604914
		St Deviation	0.246915					St Deviation	0.237759
	1	Left	0.675				1	Left	0.65909
	3	Left	0.5				3	Left	0.517855
	6	Left	0.8				6	Left	0.720835
	7	Left	0.321255				7	Left	0.166667
	9	Left	0.608889				9	Left	0.265277
	11	Left	0.190909				11	Left	0.075
	12	Left	0.196205				12	Left	0.50595
	14	Left	0.16665				14	Left	0.25
		Average	0.432363					Average	0.395084
		St Deviation	0.24692					St Deviation	0.237759

## Sheet: Injured Control Phase Data
Time point	Animal ID	Hindlimb Phase	Heterolateral Phase	Homolateral Phase	Forelimb Phase			Time point	Animal ID	Hindlimb Phase	Heterolateral Phase	Homolateral Phase	Forelimb Phase
PD2	1	0.619048	0	0.52381	0.5			PD3	1	0.576923	0.0666667	0.653846	0.575758
PD2	1	0.5	0.047619	0.55	0.52381			PD3	1	0.566667	0.0333333	0.533333	0.555556
PD2	1	0.571429	0	0.52381	0.521739			PD3	1	0.511111	0.155556	0.688889	0.615385
PD2	1	0.578947	0.263158	0.789474	0.555556			PD3	1	0.555556	0.259259	0.814815	0.576923
PD2	1	0.608696	0.173913	0.608696	0.555556			PD3	1	0.586207	0.206897	0.758621	0.533333
PD2	1	0.5	0	0.6875	0.5			PD3	1	0.571429	0.307692	0.809524	0.636364
PD2	1	0.818182	0.4	0.545455	0.6			PD3	1	0.52381	0.142857	0.619048	0.56
PD2	1	1	0.428571	0.7	0.56			PD3	1	0.53125	0.3125	0.71875	0.551724
PD2	1	0.888889	0.111111	0.5	0.55			PD3	1	0.555556	0.194444	0.611111	0.535714
PD2	1	0.764706	0.4	0.529412	0.545455			PD3	1	0.529412	0.0277778	0.529412	0.5
PD2	1	0.631579	0.210526	0.789474	0.52381			PD3	1	0.585366	0.0731707	0.536585	0.533333
PD2	1	0.8	0.1	0.75	0.565217			PD3	1	1	0.470588	0.555556	0.56
PD2	1	0.85	0.192308	0.576923	0.52381			PD3	1	0.941176	0.321429	0.8	0.625
PD2	1	0.692308	0	0.64	0.55			PD3	1	0.642857	0.37931	0.827586	0.518519
PD2	3	0.5	0	0.588235	0.548387			PD3	3	0.545455	0.151515	0.575758	0.533333
PD2	3	0.548387	0.0882353	0.633333	0.5			PD3	3	0.653846	0.0769231	0.692308	0.533333
PD2	3	0.548387	0.166667	0.735294	0.533333			PD3	3	0.517241	0.0689655	0.551724	0.5
PD2	3	0.6875	0	0.538462	0.6			PD3	3	0.515152	0.0606061	0.515152	0.517241
PD2	3	0.6875	0.333333	0.806452	0.517241			PD3	3	0.516129	0.0606061	0.645161	0.517241
PD2	3	0.636364	0.157895	0.631579	0.526316			PD3	3	0.545455	0	0.545455	0.515152
PD2	3	0.52381	0.1	0.6	0.52381			PD3	3	0.5	0.03125	0.53125	0.529412
PD2	3	0.566667	0.130435	0.782609	0.5			PD3	3	0.5	0.125	0.6875	0.529412
PD2	3	0.615385	0.0909091	0.606061	0.652174			PD3	3	0.515152	0.103448	0.575758	0.513514
PD2	3	0.823529	0.125	0.583333	0.521739			PD3	3	0.724138	0.392857	0.586207	0.538462
PD2	3	0.769231	0.08	0.52	0.545455			PD3	3	0.777778	0.222222	0.592593	0.516129
PD2	3	0.636364	0.04	0.576923	0.538462			PD3	3	0.535714	0.133333	0.785714	0.521739
PD2	4	0.52	0.32	0.72	0.583333			PD3	3	0.555556	0.114286	0.703704	0.52
PD2	4	0.52	0.36	0.76	0.583333			PD3	3	0.533333	0.162162	0.633333	0.535714
PD2	4	0.518519	0.37037	0.740741	0.52381			PD3	4	0.517241	0.448276	0.827586	0.576923
PD2	4	0.64	0.12	0.64	0.5			PD3	4	0.515152	0.393939	0.969697	0.538462
PD2	4	0.52	0.2	0.64	0.538462			PD3	4	0.517241	0.206897	0.724138	0.5
PD2	4	0.52	0.12	0.52	0.521739			PD3	4	0.515152	0.212121	0.69697	0.5
PD2	4	0.521739	0.26087	0.695652	0.5			PD3	4	0.514286	0.285714	0.771429	0.527778
PD2	4	0.545455	0.363636	0.818182	0.5			PD3	4	0.575758	0.212121	0.727273	0.53125
PD2	4	0.6	0.4	1	0.52381			PD3	4	0.529412	0.264706	0.705882	0.515152
PD2	4	0.52	0.48	0.88	0.5			PD3	4	0.527778	0.138889	0.611111	0.53125
PD2	4	0.538462	0.307692	0.92	0.5			PD3	4	0.5	0.03125	0.5	0.5
PD2	4	0.611111	0	0.527778	0.575758			PD3	4	0.6	0.025	0.525	0.571429
PD2	4	0.5	0.0833333	0.615385	0.541667			PD3	4	0.617647	0.470588	0.852941	0.580645
PD2	4	0.5	0.192308	0.730769	0.5			PD3	4	0.534884	0.325581	0.941176	0.533333
PD2	6	0.535714	0	0.607143	0.5			PD3	4	0.605263	0.157895	0.744186	0.514286
PD2	6	0.52	0.214286	0.68	0.538462			PD3	4	0.542857	0.285714	0.714286	0.592593
PD2	6	0.515152	0.333333	0.727273	0.517241			PD3	6	0.518519	0.148148	0.592593	0.555556
PD2	6	0.516129	0.451613	0.83871	0.5			PD3	6	0.518519	0.111111	0.62963	0.5
PD2	6	1	0	0.903226	0.517241			PD3	6	0.588235	0.264706	0.764706	0.514286
PD2	6	0.857143	0.214286	0.571429	0.517241			PD3	6	0.5	0.0714286	0.8	0.518519
PD2	6	0.545455	0.5	1	0.5			PD3	6	0.566667	0.133333	0.633333	0.558824
PD2	6	0.517241	0.206897	0.724138	0.558824			PD3	6	0.5	0.133333	0.6	0.517241
PD2	6	0.62963	0.185185	0.62963	0.571429			PD3	6	0.516129	0.290323	0.709677	0.5
PD2	6	0.529412	0.206897	0.529412	0.5			PD3	6	0.913043	0.26087	0.695652	0.52381
PD2	6	0.551724	0.129032	0.62069	0.555556			PD3	6	0.73913	0.428571	0.666667	0.52381
PD2	6	0.580645	0.0645161	0.580645	0.64			PD3	6	0.619048	0.166667	0.857143	0.5
PD2	6	0.548387	0.16129	0.612903	0.5			PD3	6	0.722222	0.294118	0.555556	0.611111
PD2	6	0.925926	0.296296	0.814815	0.583333			PD3	6	0.636364	0.380952	0.590909	0.52
PD2	6	0.666667	0.4	0.8	0.565217			PD3	6	0.586207	0.37931	0.758621	0.576923
PD2	7	0.518519	0.333333	0.814815	0.576923			PD3	6	0.545455	0.454545	0.931034	0.571429
PD2	7	0.515152	0.30303	0.848485	0.535714			PD3	6	0.636364	0.26087	0.727273	0.55
PD2	7	0.588235	0.117647	0.558824	0.558824			PD3	7	0.571429	0.142857	0.607143	0.606061
PD2	7	0.633333	0.133333	0.566667	0.566667			PD3	7	0.935484	0.236842	0.677419	0.568182
PD2	7	0.529412	0.384615	0.764706	0.548387			PD3	7	0.589744	0.025641	0.538462	0.565217
PD2	7	0.941176	0.185185	0.666667	0.5			PD3	7	0.5	0.26087	0.769231	0.636364
PD2	7	1	0.117647	0.617647	0.595238			PD3	7	0.913043	0.315789	0.868421	0.511628
PD2	7	0.538462	0.346154	0.846154	0.526316			PD3	7	0.866667	0.305556	0.8	0.588235
PD2	7	0.535714	0.428571	0.821429	0.551724			PD3	7	0.638889	0.225806	0.75	0.5
PD2	7	0.6	0.1	0.75	0.611111			PD3	7	0.944444	0.22	0.83871	0.525
PD2	7	0.777778	0.181818	0.722222	0.625			PD3	7	0.5	0.305556	0.694444	0.666667
PD2	7	0.545455	0.5	0.681818	0.576923			PD3	7	0.638889	0.194444	0.666667	0.5625
PD2	7	0.5	0.384615	0.807692	0.541667			PD3	7	0.5	0.21875	0.6875	0.516129
PD2	7	1	0.08	0.6	0.580645			PD3	7	0.558824	0.205882	0.676471	0.53125
PD2	7	0.72	0.5	1	0.555556			PD3	7	0.555556	0.166667	0.638889	0.515152
PD2	9	0.809524	0.428571	0.740741	0.592593			PD3	7	0.540541	0	0.540541	0.526316
PD2	9	0.555556	0.296296	0.8	0.571429			PD3	7	0.548387	0.0322581	0.516129	0.517241
PD2	9	0.727273	0.136364	0.772727	0.5			PD3	9	0.703704	0.444444	0.888889	0.5
PD2	9	0.521739	0.130435	0.608696	0.521739			PD3	9	0.515152	0.363636	0.5	0.52
PD2	9	0.56	0.12	0.6	0.52			PD3	9	0.740741	0.0740741	0.727273	0.535714
PD2	9	0.6875	0.454545	0.73913	0.52381			PD3	9	0.555556	0.296296	0.777778	0.518519
PD2	9	0.6	0.304348	0.8	0.55			PD3	9	0.586207	0.241379	0.758621	0.5
PD2	9	0.769231	0.346154	0.653846	0.6			PD3	9	0.571429	0.214286	0.75	0.517241
PD2	9	1	0.5	0.884615	0.75			PD3	9	0.516129	0.0967742	0.612903	0.5
PD2	9	0.8125	0.4375	0.75	0.571429			PD3	9	0.606061	0.121212	0.757576	0.552632
PD2	9	0.6875	0.5	0.916667	0.526316			PD3	9	0.609756	0.097561	0.512195	0.5
PD2	9	0.653846	0.208333	0.708333	0.521739			PD3	9	0.538462	0.25641	0.794872	0.552632
PD2	9	0.789474	0.173913	0.782609	0.5			PD3	9	0.615385	0.230769	0.538462	0.636364
PD2	9	0.684211	0.346154	0.730769	0.565217			PD3	9	0.511628	0.0697674	0.604651	0.621622
PD2	11	0.75	0.4375	1	0.608696			PD3	9	0.5	0.0697674	0.605263	0.5
PD2	11	0.571429	0.285714	0.809524	0.5			PD3	9	0.534483	0.0517241	0.637931	0.589744
PD2	11	0.555556	0.407407	0.814815	0.5			PD3	9	0.6	0.155172	0.685714	0.608696
PD2	11	0.56	0.12	0.68	0.583333			PD3	11	0.5	0.181818	0.568182	0.515152
PD2	11	0.518519	0.111111	0.592593	0.518519			PD3	11	0.592593	0.0681818	0.555556	0.529412
PD2	11	0.846154	0.384615	0.789474	0.545455			PD3	11	0.586957	0.0869565	0.543478	0.512195
PD2	11	0.631579	0.473684	0.894737	0.666667			PD3	11	0.596154	0.0217391	0.557692	0.545455
PD2	11	0.631579	0.368421	0.809524	0.52381			PD3	11	0.681818	0.363636	0.909091	0.541667
PD2	11	0.52381	0.380952	0.666667	0.55			PD3	11	0.884615	0.307692	0.625	0.56
PD2	11	0.533333	0.227273	0.636364	0.583333			PD3	11	0.615385	0.269231	0.846154	0.5
PD2	11	0.545455	0.1875	0.625	0.55			PD3	11	0.535714	0.0714286	0.642857	0.533333
PD2	11	0.6875	0.0384615	0.615385	0.533333			PD3	11	0.653846	0.153846	0.576923	0.541667
PD2	11	0.538462	0.0769231	0.52381	0.608696			PD3	11	0.571429	0.142857	0.666667	0.52381
PD2	11	0.52381	0.05	0.55	0.5			PD3	11	0.5	0.181818	0.636364	0.521739
PD2	11	0.55	0.2	0.666667	0.578947			PD3	11	0.545455	0.136364	0.681818	0.555556
PD2	12	0.723404	0.28	0.92	0.571429			PD3	11	0.5	0.107143	0.642857	0.518519
PD2	12	0.553191	0.047619	0.809524	0.592593			PD3	11	0.518519	0.111111	0.62963	0.545455
PD2	12	0.87234	0.234043	0.702128	0.594595			PD3	12	0.695652	0.23913	0.804348	0.643836
PD2	12	0.517241	0.0344828	0.689655	0.512821			PD3	12	0.695652	0.260274	0.616438	0.6
PD2	12	0.578947	0.131579	0.578947	0.613636			PD3	12	0.506849	0.358209	0.671642	0.66129
PD2	12	0.516129	0.16129	0.612903	0.548387			PD3	12	0.910448	0.42	0.78	0.660377
PD2	12	0.533333	0.266667	0.7	0.518519			PD3	12	0.633333	0.2	0.666667	0.5
PD2	12	0.666667	0.242424	0.666667	0.566667			PD3	12	0.647059	0.470588	0.9	0.613636
PD2	12	0.571429	0.371429	0.742857	0.5625			PD3	12	0.72973	0.243243	0.702703	0.510638
PD2	12	0.517241	0.344828	0.827586	0.527778			PD3	12	0.783784	0.116279	0.651163	0.6
PD2	12	0.617647	0.235294	0.735294	0.576923			PD3	12	0.693878	0.408163	0.979592	0.595745
PD2	12	0.809524	0.26087	0.619048	0.541667			PD3	12	0.535714	0.107143	0.964286	0.555556
PD2	12	0.666667	0.181818	0.727273	0.586207			PD3	12	0.881579	0.210526	0.526316	0.619048
PD2	12	0.666667	0.208333	0.791667	0.521739			PD3	12	0.588235	0.0882353	0.558824	0.567568
PD2	12	0.545455	0.166667	0.6	0.583333			PD3	12	0.863636	0.368421	0.681818	0.5
PD2	14	0.72	0.24	0.6	0.64			PD3	12	0.605263	0.246753	0.973684	0.510638
PD2	14	0.555556	0.222222	0.740741	0.56			PD3	14	0.571429	0.342857	0.8	0.68
PD2	14	0.628571	0.114286	0.571429	0.56			PD3	14	0.633333	0.433333	0.833333	0.62963
PD2	14	0.538462	0.171429	0.730769	0.565217			PD3	14	0.606061	0.30303	1	0.516129
PD2	14	0.693878	0.44898	0.857143	0.541667			PD3	14	0.54902	0.215686	0.54902	0.527778
PD2	14	0.576923	0.0816327	0.653061	0.608696			PD3	14	0.540541	0.0784314	0.594595	0.527778
PD2	14	0.538462	0	0.615385	0.583333			PD3	14	0.5	0.135135	0.617647	0.5
PD2	14	0.888889	0.0909091	0.545455	0.608696			PD3	14	0.555556	0.166667	0.694444	0.575758
PD2	14	0.681818	0.107143	0.75	0.5			PD3	14	0.5	0.0833333	0.527778	0.516129
PD2	14	0.535714	0.0606061	0.575758	0.5			PD3	14	0.527273	0.363636	0.654545	0.588235
PD2	14	0.545455	0.16	0.62	0.576923			PD3	14	0.52381	0.333333	1	0.652174
PD2	14	0.555556	0.416667	0.805556	0.52381			PD3	14	0.511111	0.4	0.714286	0.514286
PD2	14	0.548387	0.193548	0.709677	0.75			PD3	14	0.5	0.142857	0.777778	0.533333
PD2	14	0.904762	0.0952381	0.809524	0.59375			PD3	14	0.666667	0.212121	0.818182	0.517241
PD2	14	0.793103	0.310345	0.724138	0.6			PD3	14	0.538462	0.102564	0.512821	0.666667
PD2	15	0.518519	0.296296	0.703704	0.56			PD3	14	0.515152	0	0.606061	0.542857
PD2	15	0.53125	0.1875	0.65625	0.555556			PD3	15	0.514286	0.114286	0.6	0.515152
PD2	15	0.533333	0.0333333	0.533333	0.52			PD3	15	0.512821	0.0512821	0.564103	0.53125
PD2	15	0.588235	0.0294118	0.5	0.571429			PD3	15	0.513514	0.324324	0.72973	0.516129
PD2	15	0.5	0.147059	0.75	0.5			PD3	15	0.638889	0.472222	0.833333	0.580645
PD2	15	0.535714	0.178571	0.607143	0.6			PD3	15	0.560976	0.219512	0.609756	0.529412
PD2	15	0.538462	0.346154	0.730769	0.545455			PD3	15	0.55102	0.183673	0.571429	0.609756
PD2	15	0.518519	0.259259	0.666667	0.576923			PD3	15	0.681818	0.102041	0.704545	0.542857
PD2	15	0.636364	0.272727	0.863636	0.565217			PD3	15	0.513514	0.351351	1	0.606061
PD2	15	0.619048	0.428571	0.857143	0.55			PD3	15	0.515152	0.030303	0.515152	0.571429
PD2	15	0.5	0.466667	0.933333	0.521739			PD3	15	0.615385	0.121212	0.615385	0.518519
PD2	15	0.576923	0.423077	1	0.545455			PD3	15	0.5	0.0882353	0.5	0.5
PD2	15	0.521739	0.304348	0.884615	0.571429			PD3	15	0.5	0.0882353	0.6	0.5
PD2	15	0.533333	0.166667	0.695652	0.538462			PD3	15	0.533333	0.133333	0.566667	0.535714
								PD3	15	0.545455	0.272727	0.666667	0.535714
								PD3	15	0.542857	0.342857	0.828571	0.53125
	Average	0.628413	0.225382	0.704962	0.552494				Average	0.595642	0.204698	0.686144	0.547836
	St. Deviation	0.130994	0.142539	0.121856	0.0439429				St. Deviation	0.11218	0.124172	0.125386	0.0440106
	Total Number Steps	143	143	143	143				Total Number Steps	145	145	145	145
	# of steps outside 2 S.D.	55	63	50	7				# of steps outside 2 S.D.	36	58	44	14

## Sheet: Injured Dox Phase Data
Time point	Animal ID	Hindlimb Phase	Heterolateral Phase	Homolateral Phase	Forelimb Phase			Time point	Animal ID	Hindlimb Phase	Heterolateral Phase	Homolateral Phase	Forelimb Phase			Time point	Animal ID	Hindlimb Phase	Heterolateral Phase	Homolateral Phase	Forelimb Phase			Time point	Animal ID	Hindlimb Phase	Heterolateral Phase	Homolateral Phase	Forelimb Phase
D2D5	1	0.555556	0.37037	0.888889	0.538462			D2D8	1	0.586207	0.241379	0.758621	0.5			D3D8	1	0.533333	0.0344828	0.533333	0.571429			D3D20	1	0.538462	0.423077	0.884615	0.52
D2D5	1	0.566667	0.366667	0.866667	0.517241			D2D8	1	0.555556	0.148148	0.740741	0.533333			D3D8	1	0.517241	0.0344828	0.517241	0.518519			D3D20	1	0.552632	0.263158	0.710526	0.514286
D2D5	1	0.592593	0.481481	0.925926	0.52			D2D8	1	0.586207	0.241379	0.758621	0.517241			D3D8	1	0.56	0	0.52	0.5			D3D20	1	0.655172	0.241379	0.931034	0.534884
D2D5	1	0.518519	0	0.62963	0.615385			D2D8	1	0.56	0.16	0.68	0.535714			D3D8	1	0.56	0.04	0.52	0.5			D3D20	1	0.517241	0.222222	0.606061	0.59375
D2D5	1	0.571429	0.037037	0.678571	0.6			D2D8	1	0.541667	0.166667	0.625	0.521739			D3D8	1	0.533333	0.133333	0.666667	0.515152			D3D20	1	0.571429	0.212121	0.642857	0.586207
D2D5	1	0.541667	0	0.541667	0.521739			D2D8	1	0.541667	0.125	0.625	0.52			D3D8	1	0.535714	0.107143	0.642857	0.517241			D3D20	1	0.652174	0.214286	0.565217	0.516129
D2D5	1	0.555556	0.0416667	0.62963	0.56			D2D8	1	0.571429	0.0357143	0.5	0.566667			D3D8	1	0.548387	0.0645161	0.548387	0.53125			D3D20	1	0.6	0.0666667	0.538462	0.517241
D2D5	1	0.5625	0	0.625	0.521739			D2D8	1	0.5	0.0714286	0.571429	0.518519			D3D8	1	0.571429	0.214286	0.714286	0.517241			D3D20	1	0.576923	0	0.52	0.571429
D2D5	1	0.578947	0.105263	0.684211	0.608696			D2D8	1	0.542857	0.0571429	0.628571	0.571429			D3D8	1	0.56	0.04	0.64	0.5			D3D20	1	0.6	0.08	0.586207	0.545455
D2D5	1	0.714286	0.142857	0.714286	0.615385			D2D8	1	0.548387	0.0967742	0.516129	0.551724			D3D8	1	0.5	0.0416667	0.538462	0.535714			D3D20	1	0.551724	0.0344828	0.580645	0.53125
D2D5	1	0.769231	0	0.894737	0.571429			D2D8	1	0.576923	0.0769231	0.615385	0.518519			D3D8	1	0.8125	0.193548	0.5625	0.52381			D3D20	1	0.516129	0.0967742	0.545455	0.566667
D2D5	1	0.761905	0.315789	0.631579	0.53125			D2D8	1	0.535714	0.0714286	0.607143	0.535714			D3D8	1	0.583333	0.1	0.541667	0.583333			D3D20	1	0.515152	0.0909091	0.533333	0.53125
D2D5	1	0.56	0	0.703704	0.52381			D2D8	1	0.68	0	0.6	0.5			D3D8	1	0.5	0.212121	0.5	0.533333			D3D20	1	0.5	0.0333333	0.714286	0.548387
D2D5	3	0.586207	0.241379	0.793103	0.5			D2D8	1	0.555556	0	0.555556	0.555556			D3D8	1	0.8	0.137931	0.612903	0.535714			D3D20	1	0.608696	0.391304	0.653846	0.538462
D2D5	3	0.611111	0.25	0.777778	0.558824			D2D8	3	0.515152	0.424242	0.848485	0.517241			D3D8	1	0.580645	0.09375	0.566667	0.5625			D3D20	1	0.5	0.178571	0.692308	0.5
D2D5	3	0.526316	0.184211	0.631579	0.514286			D2D8	3	0.529412	0.5	0.970588	0.516129			D3D8	3	0.678571	0.0714286	0.5	0.6			D3D20	3	0.576923	0.125	0.576923	0.5
D2D5	3	0.666667	0.133333	0.633333	0.545455			D2D8	3	0.545455	0	0.727273	0.538462			D3D8	3	0.5625	0.125	0.5625	0.533333			D3D20	3	0.541667	0.0384615	0.583333	0.548387
D2D5	3	0.681818	0.318182	0.681818	0.692308			D2D8	3	0.558824	0.181818	0.735294	0.5			D3D8	3	0.551724	0.172414	0.62069	0.518519			D3D20	3	0.538462	0.384615	0.884615	0.5
D2D5	3	0.515152	0.242424	0.69697	0.517241			D2D8	3	0.627451	0.235294	0.784314	0.514286			D3D8	3	0.636364	0.136364	0.681818	0.538462			D3D20	3	0.565217	0.434783	0.826087	0.608696
D2D5	3	0.612903	0.129032	0.612903	0.53125			D2D8	3	0.575	0.425	0.875	0.555556			D3D8	3	0.652174	0.304348	0.826087	0.516129			D3D20	3	0.565217	0.230769	0.769231	0.533333
D2D5	3	0.510638	0.382979	0.744681	0.5			D2D8	3	0.527778	0.277778	0.875	0.555556			D3D8	3	0.518519	0.0322581	0.592593	0.566667			D3D20	3	0.52	0.28	0.84	0.518519
D2D5	3	0.526316	0.394737	0.842105	0.55			D2D8	3	0.517241	0.448276	0.931034	0.521739			D3D8	3	0.516129	0.193548	0.645161	0.583333			D3D20	3	0.571429	0.285714	0.785714	0.518519
D2D5	3	0.625	0.2	0.921053	0.543478			D2D8	3	0.62963	0.333333	0.896552	0.52			D3D8	3	0.516129	0.0645161	0.612903	0.548387			D3D20	3	0.517241	0.0689655	0.551724	0.5
D2D5	3	0.594595	0.108108	0.621622	0.541667			D2D8	3	0.517241	0.206897	0.655172	0.5			D3D8	3	0.551724	0.0344828	0.586207	0.533333			D3D20	3	0.541667	0.0416667	0.75	0.56
D2D5	3	0.565217	0.217391	0.608696	0.541667			D2D8	3	0.575758	0.030303	0.515152	0.541667			D3D8	3	0.555556	0	0.518519	0.566667			D3D20	3	0.515152	0.181818	0.575758	0.535714
D2D5	3	0.555556	0.2	0.666667	0.533333			D2D8	3	0.558824	0	0.558824	0.558824			D3D8	3	0.576923	0.115385	0.5	0.583333			D3D20	3	0.555556	0.0740741	0.555556	0.518519
D2D5	3	0.517241	0.0689655	0.517241	0.6			D2D8	3	0.551724	0	0.551724	0.551724			D3D8	3	0.5	0	0.617647	0.59375			D3D20	3	0.516129	0.0645161	0.516129	0.518519
D2D5	3	0.545455	0.0909091	0.575758	0.5			D2D8	3	0.527778	0	0.638889	0.580645			D3D8	3	0.516129	0.0588235	0.612903	0.5625			D3D20	4	0.625	0.375	0.791667	0.521739
D2D5	4	0.514286	0.2	0.657143	0.5			D2D8	4	0.567568	0.189189	0.594595	0.558824			D3D8	4	0.589744	0.307692	0.589744	0.607143			D3D20	4	0.518519	0.185185	0.592593	0.5
D2D5	4	0.515152	0.030303	0.575758	0.551724			D2D8	4	0.5	0.305556	0.722222	0.53125			D3D8	4	0.580645	0.0322581	0.516129	0.517241			D3D20	4	0.533333	0	0.533333	0.5
D2D5	4	0.588235	0.382353	0.794118	0.5625			D2D8	4	0.552632	0.263158	0.684211	0.589744			D3D8	4	0.53125	0.0322581	0.625	0.518519			D3D20	4	0.5	0.0666667	0.607143	0.5
D2D5	4	0.5	0.361111	1	0.5			D2D8	4	0.55	0.15	0.6	0.526316			D3D8	4	0.538462	0.0769231	0.576923	0.565217			D3D20	4	0.515152	0.151515	0.636364	0.533333
D2D5	4	0.548387	0.129032	0.612903	0.517241			D2D8	4	0.548387	0.258065	0.741935	0.517241			D3D8	4	0.541667	0.0384615	0.583333	0.521739			D3D20	4	0.548387	0.16129	0.677419	0.516129
D2D5	4	0.515152	0.212121	0.69697	0.533333			D2D8	4	0.684211	0.263158	1	0.513514			D3D8	4	0.518519	0.037037	0.592593	0.583333			D3D20	4	0.545455	0	0.545455	0.580645
D2D5	4	0.548387	0.16129	0.612903	0.517241			D2D8	4	0.6	0.18	0.763158	0.55			D3D8	4	0.515152	0.121212	0.636364	0.514286			D3D20	4	0.533333	0.0606061	0.566667	0.5
D2D5	4	0.533333	0.166667	0.666667	0.5			D2D8	4	0.542857	0.02	0.54	0.533333			D3D8	4	0.555556	0.138889	0.583333	0.542857			D3D20	4	0.518519	0.222222	0.62963	0.521739
D2D5	4	0.514286	0.257143	0.714286	0.516129			D2D8	4	0.516129	0.451613	0.903226	0.5			D3D8	4	0.535714	0.285714	0.714286	0.538462			D3D20	4	0.566667	0.333333	0.733333	0.538462
D2D5	4	0.514286	0.257143	0.714286	0.5			D2D8	4	0.5	0.28125	0.870968	0.5			D3D8	4	0.518519	0.333333	0.740741	0.576923			D3D20	4	0.548387	0.193548	0.548387	0.592593
D2D5	4	0.5	0.194444	0.638889	0.515152			D2D8	4	0.5625	0.28125	0.71875	0.533333			D3D8	4	0.533333	0.166667	0.666667	0.516129			D3D20	4	0.517241	0.172414	0.655172	0.533333
D2D5	4	0.529412	0.176471	0.647059	0.515152			D2D8	4	0.638889	0.416667	0.861111	0.533333			D3D8	4	0.5	0.178571	0.642857	0.535714			D3D20	6	0.606061	0.121212	0.606061	0.529412
D2D5	4	0.5	0.157895	0.657895	0.5			D2D8	4	0.53125	0.40625	0.8125	0.5625			D3D8	6	0.571429	0.107143	0.571429	0.615385			D3D20	6	0.56	0.12	0.68	0.538462
D2D5	4	0.542857	0.2	0.657143	0.513514			D2D8	4	0.5	0.222222	0.638889	0.518519			D3D8	6	0.5	0.482759	0.538462	0.5			D3D20	6	0.551724	0.137931	0.517241	0.608696
D2D5	4	0.514286	0.2	0.685714	0.5			D2D8	6	0.75	0	0.571429	0.516129			D3D8	6	0.551724	0.454545	0.965517	0.518519			D3D20	6	0.5	0.125	0.625	0.576923
D2D5	6	0.518519	0.407407	0.851852	0.52			D2D8	6	0.607143	0.12	0.56	0.56			D3D8	6	0.515152	0.21875	0.878788	0.575758			D3D20	6	0.56	0.48	0.96	0.521739
D2D5	6	0.53125	0.40625	0.96875	0.5			D2D8	6	0.68	0.0833333	0.638889	0.655172			D3D8	6	0.59375	0.03125	0.939394	0.590909			D3D20	6	0.75	0.5	0.92	0.52381
D2D5	6	0.681818	0.136364	0.681818	0.5			D2D8	6	0.606061	0.212121	0.575758	0.5			D3D8	6	0.588235	0.147059	0.588235	0.545455			D3D20	6	0.535714	0.25	0.785714	0.555556
D2D5	6	0.5	0.216216	0.541667	0.577778			D2D8	6	0.56	0.0606061	0.52	0.5			D3D8	6	0.53125	0.1875	0.75	0.580645			D3D20	6	0.555556	0.194444	0.611111	0.605263
D2D5	6	0.594595	0.0810811	0.621622	0.576923			D2D8	6	0.619048	0.428571	0.904762	0.565217			D3D8	6	0.588235	0.235294	0.735294	0.53125			D3D20	6	0.542857	0.142857	0.6	0.567568
D2D5	6	0.542857	0.314286	1	0.56			D2D8	6	0.533333	0.3	0.766667	0.52381			D3D8	6	0.571429	0.0357143	0.571429	0.5			D3D20	6	0.514286	0.142857	0.657143	0.514286
D2D5	6	0.558824	0.205882	0.657143	0.612903			D2D8	6	0.551724	0	0.517241	0.517241			D3D8	6	0.53125	0.15625	0.5625	0.535714			D3D20	6	0.535714	0.142857	0.607143	0.535714
D2D5	6	0.7	0.15	0.9	0.535714			D2D8	6	0.666667	0	0.583333	0.545455			D3D8	6	0.5	0.46875	0.84375	0.538462			D3D20	6	0.521739	0.130435	0.652174	0.5
D2D5	6	0.518519	0.407407	0.814815	0.521739			D2D8	6	0.592593	0.0833333	0.666667	0.56			D3D8	6	0.730769	0.346154	0.9375	0.541667			D3D20	6	0.576923	0.115385	0.538462	0.56
D2D5	6	0.5	0.233333	0.6	0.521739			D2D8	6	0.533333	0.433333	0.9	0.565217			D3D8	6	0.576923	0.384615	0.923077	0.538462			D3D20	6	0.608696	0.242424	0.565217	0.5
D2D5	6	0.555556	0.157895	0.842105	0.541667			D2D8	6	0.612903	0.16129	0.866667	0.590909			D3D8	6	0.53125	0.34375	0.78125	0.518519			D3D20	7	0.5	0.357143	0.62069	0.5
D2D5	6	0.540541	0.0810811	0.518519	0.515152			D2D8	6	0.594595	0.135135	0.548387	0.515152			D3D8	7	0.580645	0	0.548387	0.514286			D3D20	7	0.517241	0.37931	0.892857	0.517241
D2D5	7	0.705882	0.0731707	0.764706	0.695652			D2D8	6	0.576923	0.307692	0.653846	0.571429			D3D8	7	0.6	0.114286	0.514286	0.533333			D3D20	7	0.5625	0.5	0.793103	0.538462
D2D5	7	0.585366	0.0263158	0.512195	0.538462			D2D8	6	0.538462	0.115385	0.538462	0.521739			D3D8	7	0.512821	0.0285714	0.589744	0.567568			D3D20	7	0.514286	0.142857	0.742857	0.514286
D2D5	7	0.736842	0.0588235	0.552632	0.545455			D2D8	7	0.6	0.355556	0.822222	0.515152			D3D8	7	0.647059	0	0.529412	0.512821			D3D20	7	0.756757	0.189189	0.702703	0.567568
D2D5	7	0.52381	0	0.52381	0.521739			D2D8	7	0.580645	0.451613	0.967742	0.566667			D3D8	7	0.588235	0.0512821	0.90625	0.564103			D3D20	7	0.514286	0.257143	0.742857	0.512821
D2D5	7	0.647059	0.0344828	0.647059	0.512195			D2D8	7	0.741176	0.117647	0.967742	0.551724			D3D8	7	0.59375	0.441176	0.805556	0.512821			D3D20	7	0.617647	0.147059	0.529412	0.62069
D2D5	7	0.576923	0.0666667	0.576923	0.555556			D2D8	7	0.512821	0.307692	0.666667	0.517241			D3D8	7	0.5	0.375	0.548387	0.5			D3D20	7	0.533333	0	0.566667	0.653846
D2D5	7	0.586207	0.0625	0.517241	0.533333			D2D8	7	0.5	0.352941	0.911765	0.513514			D3D8	7	0.580645	0.25	0.606061	0.526316			D3D20	7	0.547619	0.214286	0.547619	0.5625
D2D5	7	0.533333	0	0.633333	0.527778			D2D8	7	0.5	0.416667	0.888889	0.527778			D3D8	7	0.575758	0.0909091	0.658537	0.515152			D3D20	7	0.653846	0.0238095	0.769231	0.567568
D2D5	7	0.607143	0.0454545	0.642857	0.540541			D2D8	7	0.514286	0.428571	0.942857	0.529412			D3D8	7	0.512195	0.0731707	0.55	0.533333			D3D20	7	0.5	0.294118	0.823529	0.514286
D2D5	7	0.5625	0.047619	0.59375	0.53125			D2D8	7	0.5	0.0384615	0.846154	0.552632			D3D8	7	0.525	0.05	0.5625	0.512195			D3D20	7	0.631579	0.421053	0.945946	0.657895
D2D5	7	0.590909	0.352941	0.5	0.52381			D2D8	7	0.542857	0.409091	0.857143	0.5625			D3D8	7	0.53125	0	0.5	0.611111			D3D20	7	0.540541	0.459459	0.864865	0.535714
D2D5	7	0.53125	0.151515	0.5625	0.512821			D2D8	7	0.542857	0.285714	0.828571	0.617647			D3D8	7	0.84375	0.125	0.517857	0.589744			D3D20	7	0.526316	0.368421	0.684211	0.558824
D2D5	7	0.516129	0.16129	0.645161	0.5			D2D8	7	0.5	0.323529	0.823529	0.527778			D3D8	7	0.607143	0.107143	0.560976	0.534884			D3D20	9	0.5625	0.40625	0.9375	0.558824
D2D5	7	0.5	0.117647	0.647059	0.514286			D2D8	7	0.5	0.375	0.9375	0.514286			D3D8	9	0.518519	0.222222	0.777778	0.555556			D3D20	9	0.5	0.264706	0.676471	0.607143
D2D5	7	0.538462	0.0512821	0.589744	0.512195			D2D8	9	0.551724	0.310345	0.689655	0.62069			D3D8	9	0.538462	0.230769	0.730769	0.5			D3D20	9	0.65625	0.1875	0.6875	0.542857
D2D5	9	0.5	0.142857	0.785714	0.514286			D2D8	9	0.5625	0.25	0.75	0.515152			D3D8	9	0.518519	0.444444	0.5	0.548387			D3D20	9	0.566667	0.233333	0.766667	0.551724
D2D5	9	0.551724	0.103448	0.586207	0.533333			D2D8	9	0.606061	0.30303	0.727273	0.548387			D3D8	9	0.525	0.175	0.925926	0.590909			D3D20	9	0.586207	0.241379	0.758621	0.517241
D2D5	9	0.62069	0.103448	0.62069	0.517241			D2D8	9	0.53125	0.1875	0.59375	0.535714			D3D8	9	0.619048	0.2	0.575	0.6			D3D20	9	0.736842	0	0.684211	0.52
D2D5	9	0.586207	0.206897	0.689655	0.518519			D2D8	9	0.636364	0.114286	0.590909	0.53125			D3D8	9	0.566667	0	0.533333	0.533333			D3D20	9	0.548387	0.0645161	0.516129	0.515152
D2D5	9	0.575758	0.30303	0.787879	0.551724			D2D8	9	0.666667	0.037037	0.62963	0.533333			D3D8	9	0.548387	0	0.516129	0.516129			D3D20	9	0.548387	0.0322581	0.516129	0.5
D2D5	9	0.52	0.28	0.8	0.535714			D2D8	9	0.59375	0.125	0.625	0.529412			D3D8	9	0.583333	0	0.541667	0.56			D3D20	9	0.5625	0.375	0.84375	0.53125
D2D5	9	0.8	0.5	1	0.538462			D2D8	9	0.6	0.15	0.625	0.527778			D3D8	9	0.526316	0.0263158	0.552632	0.516129			D3D20	9	0.65625	0.3125	0.90625	0.558824
D2D5	9	0.727273	0.484848	0.939394	0.580645			D2D8	9	0.653846	0.153846	0.615385	0.538462			D3D8	9	0.527778	0.25	0.75	0.642857			D3D20	9	0.558824	0.470588	0.911765	0.5
D2D5	9	0.607143	0.5	0.878788	0.592593			D2D8	9	0.551724	0.275862	0.724138	0.52			D3D8	9	0.580645	0.193548	0.774194	0.529412			D3D20	9	0.521739	0.0869565	0.521739	0.590909
D2D5	9	0.527778	0.361111	0.892857	0.533333			D2D8	9	0.542857	0.114286	0.571429	0.542857			D3D8	9	0.5	0.458333	0.958333	0.52			D3D20	9	0.5	0.115385	0.538462	0.541667
D2D5	9	0.548387	0.290323	0.806452	0.536585			D2D8	9	0.625	0.125	0.5625	0.5625			D3D8	9	0.514286	0.4	0.942857	0.545455			D3D20	9	0.538462	0.115385	0.653846	0.538462
D2D5	9	0.526316	0.157895	0.657895	0.586207			D2D8	9	0.652174	0.0869565	0.826087	0.571429			D3D8	9	0.714286	0.0285714	0.742857	0.53125			D3D20	9	0.541667	0.166667	0.625	0.521739
D2D5	9	0.515152	0.30303	0.666667	0.535714			D2D8	9	0.555556	0.407407	0.851852	0.5			D3D8	11	0.5	0.441176	0.970588	0.5			D3D20	14	0.5	0.166667	0.611111	0.533333
D2D5	11	0.555556	0.37037	0.777778	0.5			D2D8	9	0.533333	0.366667	1	0.5			D3D8	11	0.592593	0.481481	1	0.535714			D3D20	14	0.52	0	0.6	0.576923
D2D5	11	0.571429	0.285714	0.857143	0.52			D2D8	11	0.566667	0.366667	0.8	0.535714			D3D8	11	0.535714	0.357143	0.962963	0.541667			D3D20	14	0.541667	0.0416667	0.75	0.653846
D2D5	11	0.548387	0.258065	0.774194	0.551724			D2D8	11	0.655172	0.241379	0.793103	0.515152			D3D8	11	0.535714	0.178571	0.571429	0.56			D3D20	14	0.540541	0.459459	0.945946	0.576923
D2D5	11	0.576923	0	0.5	0.52			D2D8	11	0.516129	0.258065	0.741935	0.5			D3D8	11	0.517241	0.206897	0.655172	0.535714			D3D20	14	0.518519	0.222222	0.864865	0.516129
D2D5	11	0.518519	0.0384615	0.555556	0.541667			D2D8	11	0.518519	0.222222	0.703704	0.535714			D3D8	11	0.551724	0.275862	0.724138	0.518519			D3D20	14	0.513514	0.216216	0.702703	0.5
D2D5	11	0.517241	0.148148	0.655172	0.5			D2D8	11	0.571429	0.178571	0.678571	0.517241			D3D8	11	0.789474	0.153846	0.526316	0.612903			D3D20	14	0.526316	0.263158	0.710526	0.5
D2D5	11	0.607143	0.107143	0.966667	0.614146			D2D8	11	0.517241	0.241379	0.689655	0.518519			D3D8	11	0.516129	0.0967742	0.516129	0.551724			D3D20	14	0.55	0.275	0.625	0.611111
D2D5	11	0.5	0.466667	0.933333	0.52			D2D8	11	0.547619	0.214286	0.595238	0.578947			D3D8	11	0.555556	0.037037	0.592593	0.576923			D3D20	14	0.542857	0.4	0.857143	0.5
D2D5	11	0.516129	0.354839	0.774194	0.5			D2D8	11	0.647059	0.264706	0.735294	0.529412			D3D8	11	0.551724	0.206897	0.758621	0.515152			D3D20	14	0.513514	0.351351	0.971429	0.518519
D2D5	11	0.516129	0.193548	0.709677	0.5			D2D8	11	0.612903	0.354839	0.806452	0.517241			D3D8	11	0.516129	0.193548	0.677419	0.516129			D3D20	14	0.518519	0.148148	0.666667	0.518519
D2D5	11	0.5	0.45	1	0.555556			D2D8	11	0.565217	0.173913	0.73913	0.5			D3D8	11	0.515152	0.242424	0.727273	0.516129			D3D20	14	0.551724	0.172414	0.586207	0.571429
D2D5	11	0.772727	0.272727	0.818182	0.53125			D2D8	11	0.571429	0.107143	0.678571	0.551724			D3D8	11	0.586207	0.103448	0.551724	0.551724			D3D20	14	0.578947	0.0526316	0.552632	0.59375
D2D5	11	0.571429	0.0714286	0.678571	0.533333			D2D8	11	0.558824	0.0882353	0.588235	0.5			D3D8	11	0.52	0.12	0.64	0.541667			D3D20	14	0.575758	0.105263	0.575758	0.5625
D2D5	11	0.548387	0.0967742	0.612903	0.517241			D2D8	11	0.7	0.277778	0.533333	0.5			D3D8	11	0.551724	0.0689655	0.551724	0.5			D3D20	14	0.5	0.151515	0.611111	0.542857
D2D5	12	0.5	0.1875	0.71875	0.5			D2D8	11	0.615385	0.115385	0.972973	0.6			D3D8	12	0.571429	0.326531	0.77551	0.536585			D3D20	15	0.533333	0.233333	0.633333	0.538462
D2D5	12	0.5	0.25	0.6875	0.533333			D2D8	11	0.594595	0.459459	1	0.555556			D3D8	12	0.6	0.35	0.925	0.547619			D3D20	15	0.535714	0.25	0.714286	0.535714
D2D5	12	0.525	0.025	0.525	0.5625			D2D8	12	0.595238	0.214286	0.52381	0.538462			D3D8	12	0.625	0.482143	0.839286	0.534884			D3D20	15	0.625	0.0526316	0.59375	0.548387
D2D5	12	0.586207	0.175	0.586207	0.542857			D2D8	12	0.583333	0.0277778	0.555556	0.617647			D3D8	12	0.55	0	0.8	0.511111			D3D20	15	0.548387	0.0625	0.645161	0.518519
D2D5	12	0.509434	0.0344828	0.528302	0.634146			D2D8	12	0.5625	0.0888889	0.5625	0.5			D3D8	12	0.5	0.125	0.590909	0.5			D3D20	15	0.535714	0.193548	0.571429	0.56
D2D5	12	0.657143	0.245283	0.714286	0.534884			D2D8	12	0.777778	0	0.611111	0.520833			D3D8	12	0.574468	0.0638298	0.574468	0.581395			D3D20	15	0.518519	0.178571	0.666667	0.538462
D2D5	12	0.526316	0.142857	0.552632	0.564103			D2D8	12	0.535714	0.25	0.857143	0.512195			D3D8	12	0.55	0	0.55	0.534884			D3D20	15	0.586207	0.222222	0.586207	0.517241
D2D5	12	0.52	0.105263	0.62	0.509804			D2D8	12	0.676471	0.470588	0.970588	0.5			D3D8	12	0.53125	0.392857	0.625	0.5625			D3D20	15	0.695652	0.0689655	0.521739	0.535714
D2D5	12	0.528302	0.12	0.622642	0.52			D2D8	12	0.645161	0.483871	0.935484	0.56			D3D8	12	0.5	0.1875	0.625	0.543478			D3D20	15	0.5	0.0625	0.53125	0.5625
D2D5	12	0.565217	0.169811	0.717391	0.511111			D2D8	12	0.55	0.05	0.575	0.683333			D3D8	12	0.571429	0.119048	0.619048	0.56			D3D20	15	0.5	0.125	0.607143	0.5
D2D5	12	0.52381	0.217391	0.690476	0.622222			D2D8	12	0.515152	0.151515	0.545455	0.588235			D3D8	12	0.723404	0.0425532	0.510638	0.5			D3D20	15	0.642857	0.285714	0.821429	0.52
D2D5	12	0.748718	0.285714	0.717949	0.575			D2D8	12	0.576923	0.12	0.96	0.511628			D3D8	12	0.638298	0.0487805	0.64	0.547619			D3D20	15	0.516129	0.225806	0.645161	0.555556
D2D5	14	0.535714	0.125	0.571429	0.515152			D2D8	12	0.543478	0.23913	0.538462	0.566667			D3D8	12	0.536585	0.0243902	0.634146	0.52381
D2D5	14	0.5625	0.03125	0.53125	0.518519			D2D8	12	0.511628	0.232558	0.630435	0.515152			D3D8	12	0.512195	0.0487805	0.585366	0.533333
D2D5	14	0.5	0.34375	0.78125	0.548387			D2D8	14	0.542857	0.114286	0.628571	0.529412			D3D8	12	0.543478	0.0612245	0.521739	0.513514
D2D5	14	0.5	0.3125	0.8125	0.529412			D2D8	14	0.558824	0.294118	0.735294	0.535714			D3D8	14	0.56	0.08	0.52	0.574468
D2D5	14	0.615385	0.410256	0.923077	0.529412			D2D8	14	0.5	0.166667	0.666667	0.5625			D3D8	14	0.510638	0.170213	0.617021	0.511628
D2D5	14	0.62963	0.333333	1	0.551724			D2D8	14	0.538462	0.0512821	0.538462	0.558824			D3D8	14	0.55814	0.116279	0.651163	0.555556
D2D5	14	0.6	0.314286	0.714286	0.517241			D2D8	14	0.514286	0.0769231	0.828571	0.5			D3D8	14	0.538462	0.0232558	0.512821	0.621622
D2D5	14	0.5	0.205882	0.617647	0.5			D2D8	14	0.55	0.457143	0.942857	0.516129			D3D8	14	0.522727	0.0769231	0.659091	0.540541
D2D5	14	0.647059	0.0294118	0.647059	0.6			D2D8	14	0.540541	0.3	1	0.592593			D3D8	14	0.536585	0.390244	0.756098	0.514286
D2D5	14	0.636364	0	0.666667	0.578947			D2D8	14	0.536585	0.432432	0.810811	0.538462			D3D8	14	0.577778	0.0666667	0.622222	0.535714
D2D5	14	0.685185	0.0925926	0.592593	0.515152			D2D8	14	0.5	0.121951	0.5	0.571429			D3D8	14	0.5	0.294118	0.794118	0.571429
D2D5	14	0.541667	0.296296	0.833333	0.615385			D2D8	14	0.566667	0.0833333	0.566667	0.588235			D3D8	14	0.567568	0.135135	0.513514	0.586207
D2D5	14	0.547619	0.479167	0.729167	0.6			D2D8	15	0.529412	0.441176	0.882353	0.555556			D3D8	14	0.522727	0.0810811	0.568182	0.551724
D2D5	14	0.589744	0.410256	1	0.533333			D2D8	15	0.609756	0.292683	1	0.548387			D3D8	14	0.55	0.35	0.75	0.612903
D2D5	14	0.575758	0.212121	0.769231	0.515152			D2D8	15	0.529412	0.235294	0.676471	0.5			D3D8	14	0.538462	0.282051	0.692308	0.567568
D2D5	15	0.6	0	0.571429	0.5			D2D8	15	0.512821	0.435897	0.820513	0.5			D3D8	15	0.512821	0.179487	0.615385	0.548387
D2D5	15	0.526316	0.131579	0.552632	0.5			D2D8	15	0.513514	0.0810811	0.594595	0.612903			D3D8	15	0.542857	0.025641	0.571429	0.516129
D2D5	15	0.567568	0.0263158	0.567568	0.564103			D2D8	15	0.615385	0.0810811	0.538462	0.653846			D3D8	15	0.54386	0.210526	0.526316	0.5625
D2D5	15	0.545455	0.272727	0.727273	0.555556			D2D8	15	0.633333	0.115385	0.5	0.514286			D3D8	15	0.511628	0.122807	0.674419	0.526316
D2D5	15	0.527778	0.472222	0.861111	0.538462			D2D8	15	0.514286	0.314286	0.685714	0.566667			D3D8	15	0.512195	0.439024	0.926829	0.571429
D2D5	15	0.5625	0	0.53125	0.53125			D2D8	15	0.555556	0.166667	0.5	0.571429			D3D8	15	0.52381	0.261905	0.853659	0.5
D2D5	15	0.514286	0	0.542857	0.551724			D2D8	15	0.5	0.4375	0.8125	0.538462			D3D8	15	0.571429	0.178571	0.75	0.551724
D2D5	15	0.5	0.222222	0.75	0.542857			D2D8	15	0.575758	0.363636	1	0.538462			D3D8	15	0.514286	0.228571	0.685714	0.5
D2D5	15	0.538462	0.179487	0.512821	0.518519			D2D8	15	0.5	0.382353	1	0.518519			D3D8	15	0.527778	0.361111	0.777778	0.535714
D2D5	15	0.529412	0.176471	0.647059	0.533333											D3D8	15	0.512821	0.410256	0.948718	0.56
D2D5	15	0.512821	0.333333	0.74359	0.5											D3D8	15	0.527778	0.0555556	0.769231	0.551724
D2D5	15	0.576923	0.192308	0.653846	0.52
D2D5	15	0.517241	0.275862	0.758621	0.538462
	Average	0.566813	0.195937	0.700694	0.539099				Average	0.568595	0.21723	0.721826	0.540209				Average	0.559221	0.166046	0.657587	0.543313				Average	0.55596	0.195767	0.676161	0.541971
	St. Deviation	0.0660769	0.135751	0.130967	0.036768				St. Deviation	0.0558061	0.140962	0.150328	0.0343725				St. Deviation	0.0624566	0.136897	0.134166	0.0311465				St. Deviation	0.0531704	0.130575	0.126518	0.0359366
	Total Number Steps	137	137	137	137				Total Number Steps	133	133	133	133				Total Number Steps	135	135	135	135				Total Number Steps	109	109	109	109
	# of steps outside 2 S.D.	19	50	43	4				# of steps outside 2 S.D.	20	63	53	4				# of steps outside 2 S.D.	12	37	34	2				# of steps outside 2 S.D.	11	39	30	4

## Sheet: Added B.P. (With Dorsal)
Limb Pair	Time Point Comparison	Proportion 1	Proportion 2	z Score	Significance
Hindlimbs	PD2 vs D2D5	55/143	19/137	4.89	p<.001
	PD2 vs D2D8	55/143	20/133	4.58	p<.001
	D2D5 vs D2D8	19/137	20/133	0.27	n.s.
	PD3 vs D3D8	36/145	12/135	3.67	p<.001
	PD3 vs D3D20	36/145	11/109	3.2	p<.005
	D3D8 vs D3D20	12/135	11/109	0.32	n.s.
Heterolateral	PD2 vs D2D5	63/143	50/137	1.29	n.s.
	PD2 vs D2D8	63/143	63/133	0.55	n.s.
	D2D5 vs D2D8	50/137	63/133	1.82	n.s.
	PD3 vs D3D8	58/145	37/135	2.25	p<.05
	PD3 vs D3D20	58/145	39/109	0.69	n.s.
	D3D8 vs D3D20	37/135	39/109	1.4	n.s.
Homolateral	PD2 vs D2D5	50/143	43/137	0.64	n.s.
	PD2 vs D2D8	50/143	53/133	0.84	n.s.
	D2D5 vs D2D8	43/137	53/133	1.46	n.s.
	PD3 vs D3D8	44/145	34/135	0.97	n.s.
	PD3 vs D3D20	44/145	30/109	0.49	n.s.
	D3D8 vs D3D20	34/135	30/109	0.41	n.s.
Forelimbs	PD2 vs D2D5	7/143	4/137	0.86	n.s.
	PD2 vs D2D8	7/143	4/133	0.81	n.s.
	D2D5 vs D2D8	4/137	4/133	0.04	n.s.
	PD3 vs D3D8	14/145	2/135	2.94	p<.05
	PD3 vs D3D20	14/145	4/109	1.84	n.s.
	D3D8 vs D3D20	2/135	4/109	1.08	n.s.

## Sheet: Phase Data (No Dorsal)
Time point	Animal ID	Hindlimb Phase	Heterolateral Phase	Homolateral Phase			Time point	Animal ID	Hindlimb Phase	Heterolateral Phase	Homolateral Phase
PD2	1	0.8	0.1	0.75			D2D5	1	0.555556	0.37037	0.888889
PD2	1	0.85	0.192308	0.576923			D2D5	1	0.566667	0.366667	0.866667
PD2	1	0.692308	0	0.64			D2D5	1	0.592593	0.481481	0.925926
PD2	3	0.5	0	0.588235			D2D5	1	0.518519	0	0.62963
PD2	3	0.548387	0.0882353	0.633333			D2D5	1	0.571429	0.037037	0.678571
PD2	3	0.548387	0.166667	0.735294			D2D5	1	0.541667	0	0.541667
PD2	3	0.636364	0.157895	0.631579			D2D5	1	0.555556	0.0416667	0.62963
PD2	3	0.52381	0.1	0.6			D2D5	1	0.5625	0	0.625
PD2	3	0.566667	0.130435	0.782609			D2D5	1	0.578947	0.105263	0.684211
PD2	3	0.615385	0.0909091	0.606061			D2D5	1	0.714286	0.142857	0.714286
PD2	3	0.823529	0.125	0.583333			D2D5	1	0.769231	0	0.894737
PD2	3	0.769231	0.08	0.52			D2D5	1	0.761905	0.315789	0.631579
PD2	3	0.636364	0.04	0.576923			D2D5	1	0.56	0	0.703704
PD2	4	0.52	0.32	0.72			D2D5	3	0.586207	0.241379	0.793103
PD2	4	0.52	0.36	0.76			D2D5	3	0.611111	0.25	0.777778
PD2	4	0.518519	0.37037	0.740741			D2D5	3	0.515152	0.242424	0.69697
PD2	4	0.64	0.12	0.64			D2D5	3	0.612903	0.129032	0.612903
PD2	4	0.52	0.2	0.64			D2D5	3	0.510638	0.382979	0.744681
PD2	4	0.52	0.12	0.52			D2D5	3	0.526316	0.394737	0.842105
PD2	4	0.521739	0.26087	0.695652			D2D5	3	0.625	0.2	0.921053
PD2	4	0.545455	0.363636	0.818182			D2D5	3	0.594595	0.108108	0.621622
PD2	4	0.6	0.4	1			D2D5	3	0.565217	0.217391	0.608696
PD2	4	0.52	0.48	0.88			D2D5	3	0.555556	0.2	0.666667
PD2	4	0.538462	0.307692	0.92			D2D5	3	0.517241	0.0689655	0.517241
PD2	4	0.611111	0	0.527778			D2D5	3	0.545455	0.0909091	0.575758
PD2	4	0.5	0.0833333	0.615385			D2D5	4	0.514286	0.2	0.657143
PD2	4	0.5	0.192308	0.730769			D2D5	4	0.515152	0.030303	0.575758
PD2	6	0.535714	0	0.607143			D2D5	4	0.588235	0.382353	0.794118
PD2	6	0.52	0.214286	0.68			D2D5	4	0.5	0.361111	1
PD2	6	0.925926	0.296296	0.814815			D2D5	4	0.548387	0.129032	0.612903
PD2	6	0.666667	0.4	0.8			D2D5	4	0.515152	0.212121	0.69697
PD2	7	0.588235	0.117647	0.558824			D2D5	4	0.548387	0.16129	0.612903
PD2	7	0.633333	0.133333	0.566667			D2D5	4	0.533333	0.166667	0.666667
PD2	7	0.529412	0.384615	0.764706			D2D5	4	0.514286	0.257143	0.714286
PD2	7	0.941176	0.185185	0.666667			D2D5	4	0.514286	0.257143	0.714286
PD2	7	1	0.117647	0.617647			D2D5	4	0.5	0.194444	0.638889
PD2	11	0.75	0.4375	1			D2D5	4	0.529412	0.176471	0.647059
PD2	11	0.571429	0.285714	0.809524			D2D5	4	0.5	0.157895	0.657895
PD2	11	0.555556	0.407407	0.814815			D2D5	4	0.542857	0.2	0.657143
PD2	11	0.56	0.12	0.68			D2D5	4	0.514286	0.2	0.685714
PD2	11	0.518519	0.111111	0.592593			D2D5	6	0.518519	0.407407	0.851852
PD2	11	0.538462	0.0769231	0.52381			D2D5	6	0.53125	0.40625	0.96875
PD2	11	0.52381	0.05	0.55			D2D5	6	0.681818	0.136364	0.681818
PD2	11	0.55	0.2	0.666667			D2D5	6	0.542857	0.314286	1
PD2	12	0.666667	0.242424	0.666667			D2D5	6	0.558824	0.205882	0.657143
PD2	12	0.571429	0.371429	0.742857			D2D5	7	0.705882	0.0731707	0.764706
PD2	12	0.517241	0.344828	0.827586			D2D5	7	0.585366	0.0263158	0.512195
PD2	12	0.617647	0.235294	0.735294			D2D5	7	0.736842	0.0588235	0.552632
PD2	14	0.693878	0.44898	0.857143			D2D5	7	0.52381	0	0.52381
PD2	14	0.576923	0.0816327	0.653061			D2D5	7	0.647059	0.0344828	0.647059
PD2	14	0.538462	0	0.615385			D2D5	7	0.576923	0.0666667	0.576923
PD2	15	0.518519	0.296296	0.703704			D2D5	7	0.586207	0.0625	0.517241
PD2	15	0.53125	0.1875	0.65625			D2D5	7	0.533333	0	0.633333
PD2	15	0.533333	0.0333333	0.533333			D2D5	7	0.607143	0.0454545	0.642857
PD2	15	0.588235	0.0294118	0.5			D2D5	7	0.5625	0.047619	0.59375
PD2	15	0.5	0.147059	0.75			D2D5	7	0.590909	0.352941	0.5
PD2	15	0.535714	0.178571	0.607143			D2D5	7	0.53125	0.151515	0.5625
PD2	15	0.538462	0.346154	0.730769			D2D5	7	0.516129	0.16129	0.645161
PD2	15	0.518519	0.259259	0.666667			D2D5	7	0.5	0.117647	0.647059
PD2	15	0.636364	0.272727	0.863636			D2D5	7	0.538462	0.0512821	0.589744
PD2	15	0.619048	0.428571	0.857143			D2D5	9	0.5	0.142857	0.785714
PD2	15	0.5	0.466667	0.933333			D2D5	9	0.551724	0.103448	0.586207
PD2	15	0.576923	0.423077	1			D2D5	9	0.62069	0.103448	0.62069
PD2	15	0.521739	0.304348	0.884615			D2D5	9	0.586207	0.206897	0.689655
PD2	15	0.533333	0.166667	0.695652			D2D5	9	0.575758	0.30303	0.787879
PD3	1	0.555556	0.259259	0.814815			D2D5	9	0.52	0.28	0.8
PD3	1	0.586207	0.206897	0.758621			D2D5	9	0.8	0.5	1
PD3	3	0.545455	0.151515	0.575758			D2D5	9	0.727273	0.484848	0.939394
PD3	3	0.653846	0.0769231	0.692308			D2D5	9	0.607143	0.5	0.878788
PD3	3	0.517241	0.0689655	0.551724			D2D5	9	0.527778	0.361111	0.892857
PD3	3	0.515152	0.0606061	0.515152			D2D5	9	0.548387	0.290323	0.806452
PD3	3	0.516129	0.0606061	0.645161			D2D5	9	0.526316	0.157895	0.657895
PD3	3	0.5	0.125	0.6875			D2D5	9	0.515152	0.30303	0.666667
PD3	3	0.515152	0.103448	0.575758			D2D5	11	0.555556	0.37037	0.777778
PD3	3	0.724138	0.392857	0.586207			D2D5	11	0.571429	0.285714	0.857143
PD3	3	0.777778	0.222222	0.592593			D2D5	11	0.548387	0.258065	0.774194
PD3	3	0.535714	0.133333	0.785714			D2D5	11	0.576923	0	0.5
PD3	3	0.555556	0.114286	0.703704			D2D5	11	0.518519	0.0384615	0.555556
PD3	3	0.533333	0.162162	0.633333			D2D5	11	0.517241	0.148148	0.655172
PD3	4	0.517241	0.448276	0.827586			D2D5	11	0.5	0.45	1
PD3	4	0.515152	0.393939	0.969697			D2D5	11	0.772727	0.272727	0.818182
PD3	4	0.517241	0.206897	0.724138			D2D5	11	0.571429	0.0714286	0.678571
PD3	4	0.515152	0.212121	0.69697			D2D5	11	0.548387	0.0967742	0.612903
PD3	4	0.514286	0.285714	0.771429			D2D5	12	0.5	0.1875	0.71875
PD3	4	0.575758	0.212121	0.727273			D2D5	12	0.5	0.25	0.6875
PD3	4	0.529412	0.264706	0.705882			D2D5	12	0.52381	0.217391	0.690476
PD3	4	0.527778	0.138889	0.611111			D2D5	12	0.748718	0.285714	0.717949
PD3	4	0.5	0.03125	0.5			D2D5	14	0.535714	0.125	0.571429
PD3	4	0.6	0.025	0.525			D2D5	14	0.5625	0.03125	0.53125
PD3	4	0.617647	0.470588	0.852941			D2D5	14	0.5	0.34375	0.78125
PD3	4	0.534884	0.325581	0.941176			D2D5	14	0.5	0.3125	0.8125
PD3	4	0.605263	0.157895	0.744186			D2D5	14	0.5	0.205882	0.617647
PD3	4	0.542857	0.285714	0.714286			D2D5	14	0.647059	0.0294118	0.647059
PD3	6	0.518519	0.148148	0.592593			D2D5	14	0.589744	0.410256	1
PD3	6	0.518519	0.111111	0.62963			D2D5	14	0.575758	0.212121	0.769231
PD3	6	0.5	0.133333	0.6			D2D5	15	0.6	0	0.571429
PD3	6	0.516129	0.290323	0.709677			D2D5	15	0.526316	0.131579	0.552632
PD3	6	0.722222	0.294118	0.555556			D2D5	15	0.567568	0.0263158	0.567568
PD3	6	0.636364	0.380952	0.590909			D2D5	15	0.545455	0.272727	0.727273
PD3	7	0.571429	0.142857	0.607143			D2D5	15	0.527778	0.472222	0.861111
PD3	7	0.935484	0.236842	0.677419			D2D5	15	0.5625	0	0.53125
PD3	7	0.589744	0.025641	0.538462			D2D5	15	0.514286	0	0.542857
PD3	7	0.5	0.26087	0.769231			D2D5	15	0.5	0.222222	0.75
PD3	7	0.913043	0.315789	0.868421			D2D5	15	0.538462	0.179487	0.512821
PD3	7	0.5	0.305556	0.694444			D2D5	15	0.529412	0.176471	0.647059
PD3	7	0.638889	0.194444	0.666667			D2D5	15	0.512821	0.333333	0.74359
PD3	7	0.5	0.21875	0.6875			D2D5	15	0.576923	0.192308	0.653846
PD3	7	0.558824	0.205882	0.676471			D2D5	15	0.517241	0.275862	0.758621
PD3	7	0.555556	0.166667	0.638889			D2D8	1	0.586207	0.241379	0.758621
PD3	7	0.540541	0	0.540541			D2D8	1	0.555556	0.148148	0.740741
PD3	7	0.548387	0.0322581	0.516129			D2D8	1	0.586207	0.241379	0.758621
PD3	9	0.555556	0.296296	0.777778			D2D8	1	0.56	0.16	0.68
PD3	9	0.586207	0.241379	0.758621			D2D8	1	0.541667	0.166667	0.625
PD3	9	0.571429	0.214286	0.75			D2D8	1	0.541667	0.125	0.625
PD3	9	0.538462	0.25641	0.794872			D2D8	1	0.571429	0.0357143	0.5
PD3	9	0.615385	0.230769	0.538462			D2D8	1	0.5	0.0714286	0.571429
PD3	9	0.511628	0.0697674	0.604651			D2D8	1	0.542857	0.0571429	0.628571
PD3	9	0.5	0.0697674	0.605263			D2D8	1	0.548387	0.0967742	0.516129
PD3	9	0.534483	0.0517241	0.637931			D2D8	1	0.576923	0.0769231	0.615385
PD3	9	0.6	0.155172	0.685714			D2D8	1	0.535714	0.0714286	0.607143
PD3	11	0.535714	0.0714286	0.642857			D2D8	1	0.68	0	0.6
PD3	11	0.653846	0.153846	0.576923			D2D8	1	0.555556	0	0.555556
PD3	11	0.571429	0.142857	0.666667			D2D8	3	0.515152	0.424242	0.848485
PD3	11	0.5	0.181818	0.636364			D2D8	3	0.529412	0.5	0.970588
PD3	11	0.545455	0.136364	0.681818			D2D8	3	0.545455	0	0.727273
PD3	11	0.5	0.107143	0.642857			D2D8	3	0.558824	0.181818	0.735294
PD3	11	0.518519	0.111111	0.62963			D2D8	3	0.627451	0.235294	0.784314
PD3	12	0.695652	0.23913	0.804348			D2D8	3	0.575	0.425	0.875
PD3	12	0.695652	0.260274	0.616438			D2D8	3	0.527778	0.277778	0.875
PD3	12	0.506849	0.358209	0.671642			D2D8	3	0.517241	0.448276	0.931034
PD3	12	0.910448	0.42	0.78			D2D8	3	0.62963	0.333333	0.896552
PD3	14	0.571429	0.342857	0.8			D2D8	4	0.567568	0.189189	0.594595
PD3	14	0.633333	0.433333	0.833333			D2D8	4	0.5	0.305556	0.722222
PD3	14	0.606061	0.30303	1			D2D8	4	0.552632	0.263158	0.684211
PD3	14	0.54902	0.215686	0.54902			D2D8	4	0.55	0.15	0.6
PD3	14	0.540541	0.0784314	0.594595			D2D8	4	0.548387	0.258065	0.741935
PD3	14	0.5	0.135135	0.617647			D2D8	4	0.684211	0.263158	1
PD3	14	0.555556	0.166667	0.694444			D2D8	4	0.6	0.18	0.763158
PD3	14	0.5	0.0833333	0.527778			D2D8	4	0.542857	0.02	0.54
PD3	14	0.666667	0.212121	0.818182			D2D8	4	0.516129	0.451613	0.903226
PD3	14	0.538462	0.102564	0.512821			D2D8	4	0.5	0.28125	0.870968
PD3	14	0.515152	0	0.606061			D2D8	4	0.5625	0.28125	0.71875
PD3	15	0.514286	0.114286	0.6			D2D8	4	0.638889	0.416667	0.861111
PD3	15	0.512821	0.0512821	0.564103			D2D8	4	0.53125	0.40625	0.8125
PD3	15	0.513514	0.324324	0.72973			D2D8	4	0.5	0.222222	0.638889
PD3	15	0.638889	0.472222	0.833333			D2D8	6	0.619048	0.428571	0.904762
PD3	15	0.560976	0.219512	0.609756			D2D8	6	0.533333	0.3	0.766667
PD3	15	0.55102	0.183673	0.571429			D2D8	6	0.551724	0	0.517241
PD3	15	0.681818	0.102041	0.704545			D2D8	6	0.666667	0	0.583333
PD3	15	0.513514	0.351351	1			D2D8	6	0.592593	0.0833333	0.666667
PD3	15	0.515152	0.030303	0.515152			D2D8	6	0.533333	0.433333	0.9
PD3	15	0.615385	0.121212	0.615385			D2D8	6	0.612903	0.16129	0.866667
PD3	15	0.5	0.0882353	0.5			D2D8	6	0.594595	0.135135	0.548387
PD3	15	0.5	0.0882353	0.6			D2D8	6	0.576923	0.307692	0.653846
PD3	15	0.533333	0.133333	0.566667			D2D8	6	0.538462	0.115385	0.538462
PD3	15	0.545455	0.272727	0.666667			D2D8	7	0.6	0.355556	0.822222
PD3	15	0.542857	0.342857	0.828571			D2D8	7	0.580645	0.451613	0.967742
							D2D8	7	0.741176	0.117647	0.967742
							D2D8	7	0.512821	0.307692	0.666667
							D2D8	7	0.5	0.352941	0.911765
							D2D8	7	0.5	0.416667	0.888889
							D2D8	7	0.514286	0.428571	0.942857
							D2D8	7	0.5	0.0384615	0.846154
							D2D8	7	0.542857	0.409091	0.857143
							D2D8	7	0.542857	0.285714	0.828571
							D2D8	7	0.5	0.323529	0.823529
							D2D8	7	0.5	0.375	0.9375
							D2D8	9	0.53125	0.1875	0.59375
							D2D8	9	0.636364	0.114286	0.590909
							D2D8	9	0.666667	0.037037	0.62963
							D2D8	9	0.59375	0.125	0.625
							D2D8	9	0.6	0.15	0.625
							D2D8	9	0.653846	0.153846	0.615385
							D2D8	9	0.551724	0.275862	0.724138
							D2D8	9	0.542857	0.114286	0.571429
							D2D8	9	0.625	0.125	0.5625
							D2D8	9	0.652174	0.0869565	0.826087
							D2D8	9	0.555556	0.407407	0.851852
							D2D8	9	0.533333	0.366667	1
							D2D8	11	0.566667	0.366667	0.8
							D2D8	11	0.655172	0.241379	0.793103
							D2D8	11	0.516129	0.258065	0.741935
							D2D8	11	0.518519	0.222222	0.703704
							D2D8	11	0.571429	0.178571	0.678571
							D2D8	11	0.517241	0.241379	0.689655
							D2D8	11	0.547619	0.214286	0.595238
							D2D8	11	0.647059	0.264706	0.735294
							D2D8	11	0.612903	0.354839	0.806452
							D2D8	11	0.565217	0.173913	0.73913
							D2D8	11	0.571429	0.107143	0.678571
							D2D8	11	0.558824	0.0882353	0.588235
							D2D8	14	0.55	0.05	0.575
							D2D8	14	0.515152	0.151515	0.545455
							D2D8	14	0.542857	0.114286	0.628571
							D2D8	14	0.558824	0.294118	0.735294
							D2D8	14	0.5	0.166667	0.666667
							D2D8	14	0.538462	0.0512821	0.538462
							D2D8	14	0.514286	0.0769231	0.828571
							D2D8	14	0.55	0.457143	0.942857
							D2D8	14	0.540541	0.3	1
							D2D8	14	0.536585	0.432432	0.810811
							D2D8	15	0.5	0.121951	0.5
							D2D8	15	0.566667	0.0833333	0.566667
							D2D8	15	0.529412	0.441176	0.882353
							D2D8	15	0.609756	0.292683	1
							D2D8	15	0.529412	0.235294	0.676471
							D2D8	15	0.512821	0.435897	0.820513
							D2D8	15	0.513514	0.0810811	0.594595
							D2D8	15	0.615385	0.0810811	0.538462
							D2D8	15	0.633333	0.115385	0.5
							D2D8	15	0.514286	0.314286	0.685714
							D2D8	15	0.555556	0.166667	0.5
							D2D8	15	0.5	0.4375	0.8125
							D3D8	1	0.575758	0.363636	1
							D3D8	1	0.5	0.382353	1
							D3D8	1	0.533333	0.0344828	0.533333
							D3D8	1	0.517241	0.0344828	0.517241
							D3D8	1	0.533333	0.133333	0.666667
							D3D8	1	0.535714	0.107143	0.642857
							D3D8	1	0.548387	0.0645161	0.548387
							D3D8	1	0.571429	0.214286	0.714286
							D3D8	1	0.56	0.04	0.64
							D3D8	1	0.5	0.0416667	0.538462
							D3D8	3	0.8125	0.193548	0.5625
							D3D8	3	0.583333	0.1	0.541667
							D3D8	3	0.678571	0.0714286	0.5
							D3D8	3	0.5625	0.125	0.5625
							D3D8	3	0.551724	0.172414	0.62069
							D3D8	3	0.636364	0.136364	0.681818
							D3D8	3	0.652174	0.304348	0.826087
							D3D8	3	0.518519	0.0322581	0.592593
							D3D8	3	0.516129	0.193548	0.645161
							D3D8	3	0.516129	0.0645161	0.612903
							D3D8	3	0.551724	0.0344828	0.586207
							D3D8	3	0.555556	0	0.518519
							D3D8	3	0.576923	0.115385	0.5
							D3D8	4	0.5	0	0.617647
							D3D8	4	0.516129	0.0588235	0.612903
							D3D8	4	0.589744	0.307692	0.589744
							D3D8	4	0.580645	0.0322581	0.516129
							D3D8	4	0.53125	0.0322581	0.625
							D3D8	4	0.538462	0.0769231	0.576923
							D3D8	4	0.541667	0.0384615	0.583333
							D3D8	4	0.518519	0.037037	0.592593
							D3D8	4	0.515152	0.121212	0.636364
							D3D8	4	0.555556	0.138889	0.583333
							D3D8	4	0.535714	0.285714	0.714286
							D3D8	4	0.518519	0.333333	0.740741
							D3D8	6	0.533333	0.166667	0.666667
							D3D8	6	0.5	0.178571	0.642857
							D3D8	6	0.571429	0.107143	0.571429
							D3D8	6	0.5	0.482759	0.538462
							D3D8	6	0.588235	0.147059	0.588235
							D3D8	6	0.53125	0.1875	0.75
							D3D8	6	0.588235	0.235294	0.735294
							D3D8	6	0.571429	0.0357143	0.571429
							D3D8	6	0.53125	0.15625	0.5625
							D3D8	7	0.576923	0.384615	0.923077
							D3D8	7	0.53125	0.34375	0.78125
							D3D8	7	0.580645	0	0.548387
							D3D8	7	0.6	0.114286	0.514286
							D3D8	7	0.512821	0.0285714	0.589744
							D3D8	7	0.647059	0	0.529412
							D3D8	7	0.580645	0.25	0.606061
							D3D8	7	0.575758	0.0909091	0.658537
							D3D8	7	0.512195	0.0731707	0.55
							D3D8	7	0.525	0.05	0.5625
							D3D8	7	0.53125	0	0.5
							D3D8	9	0.84375	0.125	0.517857
							D3D8	9	0.607143	0.107143	0.560976
							D3D8	9	0.518519	0.222222	0.777778
							D3D8	9	0.538462	0.230769	0.730769
							D3D8	11	0.527778	0.25	0.75
							D3D8	11	0.580645	0.193548	0.774194
							D3D8	11	0.5	0.441176	0.970588
							D3D8	11	0.592593	0.481481	1
							D3D8	11	0.535714	0.357143	0.962963
							D3D8	11	0.535714	0.178571	0.571429
							D3D8	11	0.517241	0.206897	0.655172
							D3D8	11	0.551724	0.275862	0.724138
							D3D8	11	0.789474	0.153846	0.526316
							D3D8	11	0.516129	0.0967742	0.516129
							D3D8	11	0.555556	0.037037	0.592593
							D3D8	11	0.551724	0.206897	0.738621
							D3D8	11	0.516129	0.193548	0.677419
							D3D8	11	0.515152	0.242424	0.727273
							D3D8	11	0.586207	0.103448	0.551724
							D3D8	12	0.52	0.12	0.64
							D3D8	12	0.551724	0.0689655	0.551724
							D3D8	12	0.571429	0.326531	0.77551
							D3D8	12	0.6	0.35	0.925
							D3D8	12	0.625	0.482143	0.839286
							D3D8	12	0.55	0	0.8
							D3D8	12	0.5	0.125	0.590909
							D3D8	12	0.536585	0.0243902	0.634146
							D3D8	14	0.512195	0.0487805	0.585366
							D3D8	14	0.543478	0.0612245	0.521739
							D3D8	14	0.56	0.08	0.52
							D3D8	14	0.510638	0.170213	0.617021
							D3D8	14	0.55814	0.116279	0.651163
							D3D8	14	0.538462	0.0232558	0.512821
							D3D8	14	0.522727	0.0769231	0.659091
							D3D8	14	0.536585	0.390244	0.756098
							D3D8	14	0.577778	0.0666667	0.622222
							D3D8	14	0.5	0.294118	0.794118
							D3D8	14	0.567568	0.135135	0.513514
							D3D8	14	0.522727	0.0810811	0.568182
							D3D8	15	0.55	0.35	0.75
							D3D8	15	0.538462	0.282051	0.692308
							D3D8	15	0.512821	0.179487	0.615385
							D3D8	15	0.542857	0.025641	0.571429
							D3D8	15	0.54386	0.210526	0.526316
							D3D8	15	0.511628	0.122807	0.674419
							D3D8	15	0.512195	0.439024	0.926829
							D3D8	15	0.52381	0.261905	0.853659
							D3D8	15	0.571429	0.178571	0.75
							D3D8	15	0.514286	0.228571	0.685714
							D3D8	15	0.527778	0.361111	0.777778
							D3D20	1	0.512821	0.410256	0.948718
							D3D20	1	0.527778	0.0555556	0.769231
							D3D20	1	0.571429	0.212121	0.642857
							D3D20	3	0.652174	0.214286	0.565217
							D3D20	3	0.6	0.0666667	0.538462
							D3D20	3	0.576923	0.125	0.576923
							D3D20	3	0.541667	0.0384615	0.583333
							D3D20	3	0.538462	0.384615	0.884615
							D3D20	3	0.565217	0.434783	0.826087
							D3D20	3	0.565217	0.230769	0.769231
							D3D20	3	0.52	0.28	0.84
							D3D20	3	0.571429	0.285714	0.785714
							D3D20	3	0.517241	0.0689655	0.551724
							D3D20	3	0.541667	0.0416667	0.75
							D3D20	3	0.515152	0.181818	0.575758
							D3D20	4	0.555556	0.0740741	0.555556
							D3D20	4	0.516129	0.0645161	0.516129
							D3D20	4	0.625	0.375	0.791667
							D3D20	4	0.518519	0.185185	0.592593
							D3D20	4	0.533333	0	0.533333
							D3D20	4	0.5	0.0666667	0.607143
							D3D20	4	0.515152	0.151515	0.636364
							D3D20	4	0.548387	0.16129	0.677419
							D3D20	4	0.545455	0	0.545455
							D3D20	4	0.533333	0.0606061	0.566667
							D3D20	4	0.518519	0.222222	0.62963
							D3D20	4	0.566667	0.333333	0.733333
							D3D20	6	0.548387	0.193548	0.548387
							D3D20	6	0.517241	0.172414	0.655172
							D3D20	6	0.606061	0.121212	0.606061
							D3D20	6	0.56	0.12	0.68
							D3D20	6	0.555556	0.194444	0.611111
							D3D20	6	0.542857	0.142857	0.6
							D3D20	6	0.514286	0.142857	0.657143
							D3D20	6	0.535714	0.142857	0.607143
							D3D20	6	0.521739	0.130435	0.652174
							D3D20	7	0.576923	0.115385	0.538462
							D3D20	7	0.608696	0.242424	0.565217
							D3D20	7	0.514286	0.142857	0.742857
							D3D20	7	0.756757	0.189189	0.702703
							D3D20	7	0.514286	0.257143	0.742857
							D3D20	9	0.5625	0.40625	0.9375
							D3D20	9	0.5	0.264706	0.676471
							D3D20	9	0.65625	0.1875	0.6875
							D3D20	9	0.566667	0.233333	0.766667
							D3D20	9	0.586207	0.241379	0.758621
							D3D20	9	0.5625	0.375	0.84375
							D3D20	9	0.65625	0.3125	0.90625
							D3D20	9	0.558824	0.470588	0.911765
							D3D20	9	0.521739	0.0869565	0.521739
							D3D20	9	0.5	0.115385	0.538462
							D3D20	9	0.538462	0.115385	0.653846
							D3D20	9	0.541667	0.166667	0.625
							D3D20	14	0.5	0.166667	0.611111
							D3D20	14	0.52	0	0.6
							D3D20	14	0.541667	0.0416667	0.75
							D3D20	14	0.540541	0.459459	0.945946
							D3D20	14	0.518519	0.222222	0.864865
							D3D20	14	0.513514	0.216216	0.702703
							D3D20	14	0.526316	0.263158	0.710526
							D3D20	14	0.55	0.275	0.625
							D3D20	14	0.542857	0.4	0.857143
							D3D20	14	0.518519	0.148148	0.666667
							D3D20	14	0.551724	0.172414	0.586207
							D3D20	14	0.578947	0.0526316	0.552632
							D3D20	14	0.575758	0.105263	0.575758
							D3D20	14	0.5	0.151515	0.611111
							D3D20	15	0.533333	0.233333	0.633333
							D3D20	15	0.535714	0.25	0.714286
							D3D20	15	0.625	0.0526316	0.59375
							D3D20	15	0.548387	0.0625	0.645161
							D3D20	15	0.535714	0.193548	0.571429
							D3D20	15	0.518519	0.178571	0.666667
							D3D20	15	0.586207	0.222222	0.586207
							D3D20	15	0.695652	0.0689655	0.521739
							D3D20	15	0.5	0.0625	0.53125
							D3D20	15	0.5	0.125	0.607143
							D3D20	15	0.642857	0.285714	0.821429
							D3D20	15	0.516129	0.225806	0.645161
	Average	0.581511	0.200308	0.685214				Average	0.55898	0.192156	0.688626
	St. Deviation	0.0998592	0.125251	0.120096				St. Deviation	0.0565953	0.1312	0.131835
	Total Number Steps	157	157	157				Total Number Steps	397	397	397
	# of steps outside 2 S.D.	33	59	44				# of steps outside 2 S.D.	39	144	121
