# Supplementary material for: Silencing long ascending propriospinal neurons after spinal cord injury improves hindlimb stepping in the adult rat
Source: eLife. 2021 Dec 2;10:e70058. doi: 10.7554/eLife.70058 (PMC8639151; doi:10.7554/eLife.70058)
Supplement: Figure 7—source data 1. [file elife-70058-fig7-data1.xlsx]

## Sheet: Post-Inj Spatiotemporal Cont
Time point	Animal ID	Swing Time	Stance Time	Stride Time	Stride Frequency	Stride Distance	Speed		Time point	Animal ID	Swing Time	Stance Time	Stride Time	Stride Frequency	Stride Distance	Speed
PD2	1	0.07	0.14	0.21	4.7619	13.4421	64.0102		PD3	1	0.08	0.18	0.26	3.84615	13.7857	53.022
PD2	1	0.07	0.13	0.2	5	16.7127	83.5634		PD3	1	0.12	0.18	0.3	3.33333	14.0017	46.6724
PD2	1	0.07	0.14	0.21	4.7619	15.1849	72.3089		PD3	1	0.12	0.33	0.45	2.22222	14.5912	32.4249
PD2	1	0.09	0.12	0.21	4.7619	16.144	76.8764		PD3	1	0.11	0.16	0.27	3.7037	16.0279	59.3627
PD2	1	0.08	0.13	0.21	4.7619	16.9935	80.9214		PD3	1	0.11	0.18	0.29	3.44828	16.5869	57.1962
PD2	1	0.07	0.01	0.08	12.5	11.0231	68.8942		PD3	1	0.1	0.13	0.23	4.34783	17.3977	82.846
PD2	1	0.02	0.08	0.1	10	3.31939	110.646		PD3	1	0.08	0.15	0.23	4.34783	16.4146	78.1648
PD2	1	0.03	0.04	0.07	14.2857	6.082	55.2909		PD3	1	0.12	0.2	0.32	3.125	15.2703	47.7196
PD2	1	0.03	0.03	0.06	16.6667	3.64516	60.7526		PD3	1	0.12	0.24	0.36	2.77778	12.7921	35.5336
PD2	1	0.05	0.04	0.09	11.1111	9.877	109.744		PD3	1	0.08	0.26	0.34	2.94118	15.4257	45.3696
PD2	1	0.07	0.1	0.17	5.88235	9.02796	53.1056		PD3	1	0.19	0.22	0.41	2.43902	10.5534	25.7399
PD2	1	0.04	0.16	0.2	5	10.1381	50.6903		PD3	1	0.05	0.04	0.09	11.1111	4.32453	48.0504
PD2	1	0.09	0.17	0.26	3.84615	18.8909	72.6571		PD3	1	0.03	0.14	0.17	5.88235	8.45734	49.7491
PD2	1	0.08	0.17	0.25	4	16.6321	66.5284		PD3	1	0.02	0.03	0.05	20	3.0355	60.71
PD2	3	0.08	0.26	0.34	2.94118	16.0633	47.2449		PD3	3	0.12	0.21	0.33	3.0303	20.3942	61.8007
PD2	3	0.08	0.22	0.3	3.33333	16.5621	55.2071		PD3	3	0.08	0.18	0.26	3.84615	18.2229	70.0883
PD2	3	0.07	0.27	0.34	2.94118	15.4294	45.3807		PD3	3	0.11	0.18	0.29	3.44828	22.3275	76.9914
PD2	3	0.07	0.19	0.26	3.84615	15.1783	58.378		PD3	3	0.13	0.2	0.33	3.0303	20.1601	61.0913
PD2	3	0.03	0.09	0.12	8.33333	5.80153	48.3461		PD3	3	0.11	0.2	0.31	3.22581	18.0716	58.2954
PD2	3	0.07	0.12	0.19	5.26316	18.468	97.2002		PD3	3	0.1	0.23	0.33	3.0303	16.924	51.2848
PD2	3	0.08	0.12	0.2	5	19.6	97.9998		PD3	3	0.09	0.23	0.32	3.125	17.5633	54.8852
PD2	3	0.06	0.17	0.23	4.34783	11.9417	51.9204		PD3	3	0.1	0.22	0.32	3.125	18.611	58.1592
PD2	3	0.08	0.25	0.33	3.0303	13.9881	42.3881		PD3	3	0.09	0.24	0.33	3.0303	17.0616	51.7017
PD2	3	0.08	0.16	0.24	4.16667	18.3983	76.6598		PD3	3	0.1	0.19	0.29	3.44828	18.1375	62.5431
PD2	3	0.08	0.17	0.25	4	18.793	75.1722		PD3	3	0.08	0.19	0.27	3.7037	15.9126	58.9354
PD2	3	0.09	0.17	0.26	3.84615	16.9824	65.317		PD3	3	0.1	0.18	0.28	3.57143	17.9288	64.0314
PD2	4	0.08	0.17	0.25	4	17.4778	69.9113		PD3	3	0.12	0.15	0.27	3.7037	19.22	71.1853
PD2	4	0.08	0.17	0.25	4	16.206	64.8239		PD3	3	0.13	0.17	0.3	3.33333	19.0211	63.4036
PD2	4	0.08	0.19	0.27	3.7037	18.698	69.2518		PD3	4	0.09	0.2	0.29	3.44828	18.4023	63.4561
PD2	4	0.08	0.17	0.25	4	16.2177	64.8709		PD3	4	0.11	0.22	0.33	3.0303	19.7242	59.7702
PD2	4	0.07	0.18	0.25	4	16.4549	65.8194		PD3	4	0.09	0.2	0.29	3.44828	18.7985	64.8224
PD2	4	0.09	0.16	0.25	4	19.2345	76.9381		PD3	4	0.1	0.23	0.33	3.0303	18.3459	55.5937
PD2	4	0.08	0.15	0.23	4.34783	18.213	79.187		PD3	4	0.09	0.26	0.35	2.85714	16.2365	46.39
PD2	4	0.07	0.15	0.22	4.54545	17.1104	77.7745		PD3	4	0.09	0.24	0.33	3.0303	18.0302	54.6369
PD2	4	0.07	0.13	0.2	5	15.7137	78.5686		PD3	4	0.11	0.23	0.34	2.94118	18.8651	55.4855
PD2	4	0.07	0.18	0.25	4	17.6025	70.41		PD3	4	0.12	0.24	0.36	2.77778	20.2492	56.2479
PD2	4	0.08	0.18	0.26	3.84615	15.9028	61.1645		PD3	4	0.11	0.21	0.32	3.125	19.8544	62.0449
PD2	4	0.08	0.28	0.36	2.77778	16.8786	46.8851		PD3	4	0.1	0.3	0.4	2.5	18.3936	45.984
PD2	4	0.09	0.17	0.26	3.84615	17.324	66.6308		PD3	4	0.08	0.26	0.34	2.94118	15.2117	44.7403
PD2	4	0.08	0.18	0.26	3.84615	17.1464	65.9476		PD3	4	0.12	0.31	0.43	2.32558	17.6812	41.119
PD2	6	0.09	0.19	0.28	3.57143	18.8079	67.1711		PD3	4	0.12	0.26	0.38	2.63158	17.8527	46.9808
PD2	6	0.07	0.18	0.25	4	18.2562	73.0249		PD3	4	0.13	0.22	0.35	2.85714	20.7313	59.2324
PD2	6	0.09	0.24	0.33	3.0303	12.7454	38.6224		PD3	6	0.08	0.19	0.27	3.7037	18.246	67.578
PD2	6	0.1	0.21	0.31	3.22581	17.5196	56.515		PD3	6	0.1	0.17	0.27	3.7037	21.2053	78.5381
PD2	6	0.03	0.08	0.11	9.09091	8.12993	73.9084		PD3	6	0.06	0.28	0.34	2.94118	13.5356	39.8107
PD2	6	0.06	0.22	0.28	3.57143	12.7553	45.5547		PD3	6	0.03	0.02	0.05	20	3.7057	74.1139
PD2	6	0.07	0.15	0.22	4.54545	5.95963	27.0892		PD3	6	0.06	0.08	0.14	7.14286	8.58903	61.3502
PD2	6	0.07	0.22	0.29	3.44828	12.757	43.9895		PD3	6	0.12	0.18	0.3	3.33333	21.9834	73.2781
PD2	6	0.08	0.19	0.27	3.7037	16.7662	62.0972		PD3	6	0.12	0.19	0.31	3.22581	17.7458	57.2445
PD2	6	0.03	0.14	0.17	5.88235	4.92546	28.9733		PD3	6	0.07	0.16	0.23	4.34783	19.1568	83.2904
PD2	6	0.07	0.22	0.29	3.44828	14.252	49.1447		PD3	6	0.03	0.03	0.06	16.6667	5.40227	90.0378
PD2	6	0.13	0.18	0.31	3.22581	10.2003	32.9043		PD3	6	0.09	0.12	0.21	4.7619	18.2779	87.0378
PD2	6	0.1	0.21	0.31	3.22581	17.2034	55.4949		PD3	6	0.07	0.11	0.18	5.55556	17.7781	98.7672
PD2	6	0.06	0.21	0.27	3.7037	13.2542	49.0898		PD3	6	0.09	0.13	0.22	4.54545	15.2454	69.2974
PD2	6	0.08	0.17	0.25	4	17.0142	68.0569		PD3	6	0.12	0.17	0.29	3.44828	20.5134	70.7357
PD2	7	0.06	0.29	0.35	2.85714	11.1458	41.2807		PD3	6	0.08	0.14	0.22	4.54545	13.7866	62.6665
PD2	7	0.04	0.12	0.16	6.25	12.2138	37.0114		PD3	6	0.08	0.14	0.22	4.54545	6.54187	29.7358
PD2	7	0.05	0.29	0.34	2.94118	11.9511	35.1504		PD3	7	0.08	0.2	0.28	3.57143	16.8746	60.2664
PD2	7	0.07	0.23	0.3	3.33333	17.1557	57.1858		PD3	7	0.05	0.26	0.31	3.22581	11.4878	37.0575
PD2	7	0.03	0.14	0.17	5.88235	5.43654	31.9796		PD3	7	0.12	0.27	0.39	2.5641	17.3087	44.3814
PD2	7	0.07	0.27	0.34	2.94118	9.23623	27.1654		PD3	7	0.07	0.19	0.26	3.84615	14.832	57.0462
PD2	7	0.02	0.14	0.16	6.25	7.02978	43.9361		PD3	7	0.05	0.18	0.23	4.34783	8.32413	36.1919
PD2	7	0.06	0.2	0.26	3.84615	12.6318	48.5838		PD3	7	0.1	0.05	0.15	6.66667	9.99961	66.6641
PD2	7	0.1	0.18	0.28	3.57143	20.0461	71.5933		PD3	7	0.12	0.24	0.36	2.77778	18.7213	52.0037
PD2	7	0.06	0.14	0.2	5	12.4882	62.4411		PD3	7	0.05	0.26	0.31	3.22581	11.8703	38.2911
PD2	7	0.09	0.09	0.18	5.55556	10.7784	59.88		PD3	7	0.1	0.26	0.36	2.77778	18.7203	52.0009
PD2	7	0.06	0.16	0.22	4.54545	11.9095	54.1342		PD3	7	0.1	0.26	0.36	2.77778	16.6763	46.323
PD2	7	0.08	0.08	0.16	6.25	11.1705	69.8158		PD3	7	0.11	0.21	0.32	3.125	18.0696	56.4676
PD2	7	0.07	0.18	0.25	4	13.8115	55.246		PD3	7	0.1	0.24	0.34	2.94118	17.1901	50.559
PD2	7	0.05	0.11	0.16	6.25	11.7035	73.1469		PD3	7	0.1	0.26	0.36	2.77778	16.2452	45.1257
PD2	9	0.05	0.16	0.21	4.7619	7.6838	36.5895		PD3	7	0.11	0.26	0.37	2.7027	21.285	57.5271
PD2	9	0.06	0.21	0.27	3.7037	13.2398	49.0363		PD3	7	0.13	0.18	0.31	3.22581	22.248	71.7676
PD2	9	0.11	0.11	0.22	4.54545	10.5759	48.0725		PD3	9	0.07	0.2	0.27	3.7037	13.6176	50.4355
PD2	9	0.11	0.12	0.23	4.34783	13.4909	58.6559		PD3	9	0.01	0.03	0.04	25	2.34303	58.5756
PD2	9	0.05	0.14	0.19	5.26316	19.9836	79.9342		PD3	9	0.1	0.23	0.33	3.0303	17.873	54.1605
PD2	9	0.05	0.06	0.11	9.09091	9.36656	85.1505		PD3	9	0.07	0.2	0.27	3.7037	16.6571	61.693
PD2	9	0.06	0.15	0.21	4.7619	18.6843	81.2363		PD3	9	0.09	0.2	0.29	3.44828	17.8212	61.4525
PD2	9	0.02	0.24	0.26	3.84615	7.86553	30.2521		PD3	9	0.08	0.2	0.28	3.57143	17.4954	62.4837
PD2	9	0.02	0.05	0.07	14.2857	4.27333	61.0476		PD3	9	0.03	0.02	0.05	20	3.3091	66.1819
PD2	9	0.04	0.12	0.16	6.25	8.19976	51.2485		PD3	9	0.1	0.21	0.31	3.22581	15.3324	49.4593
PD2	9	0.03	0.01	0.04	25	2.97664	74.416		PD3	9	0.06	0.27	0.33	3.0303	12.8682	38.9945
PD2	9	0.04	0.16	0.2	5	12.0721	50.3002		PD3	9	0.1	0.29	0.39	2.5641	11.8199	30.3073
PD2	9	0.07	0.19	0.26	3.84615	10.7119	46.5736		PD3	9	0.11	0.28	0.39	2.5641	15.9622	40.9287
PD2	9	0.07	0.13	0.2	5	12.8687	49.4951		PD3	9	0.12	0.31	0.43	2.32558	14.0909	32.7695
PD2	11	0.05	0.11	0.16	6.25	9.47886	59.2429		PD3	9	0.11	0.27	0.38	2.63158	16.4071	43.1766
PD2	11	0.07	0.14	0.21	4.7619	16.8232	80.1107		PD3	9	0.16	0.42	0.58	1.72414	13.0631	22.5226
PD2	11	0.08	0.19	0.27	3.7037	13.8374	51.2498		PD3	9	0.09	0.26	0.35	2.85714	11.1697	31.9133
PD2	11	0.07	0.18	0.25	4	15.9469	63.7876		PD3	11	0.07	0.2	0.27	3.7037	12.8001	47.4078
PD2	11	0.07	0.2	0.27	3.7037	15.4731	57.3079		PD3	11	0.12	0.34	0.46	2.17391	13.7866	29.9709
PD2	11	0.06	0.07	0.13	7.69231	8.26401	63.5693		PD3	11	0.08	0.44	0.52	1.92308	9.92955	19.0953
PD2	11	0.05	0.14	0.19	5.26316	13.5926	71.5401		PD3	11	0.02	0.05	0.07	14.2857	2.14793	30.6848
PD2	11	0.07	0.12	0.19	5.26316	15.4066	81.0873		PD3	11	0.03	0.19	0.22	4.54545	10.7745	48.9751
PD2	11	0.06	0.15	0.21	4.7619	14.6856	69.9314		PD3	11	0.03	0.05	0.08	12.5	6.43794	80.4743
PD2	11	0.04	0.11	0.15	6.66667	9.00296	60.0197		PD3	11	0.09	0.17	0.26	3.84615	16.4248	63.1722
PD2	11	0.07	0.15	0.22	4.54545	17.3957	79.0712		PD3	11	0.09	0.19	0.28	3.57143	16.9009	60.3603
PD2	11	0.05	0.11	0.16	6.25	10.0169	62.6057		PD3	11	0.09	0.17	0.26	3.84615	19.2886	74.1867
PD2	11	0.06	0.2	0.26	3.84615	11.415	43.9038		PD3	11	0.07	0.14	0.21	4.7619	16.095	76.643
PD2	11	0.08	0.13	0.21	4.7619	12.8745	61.3074		PD3	11	0.08	0.14	0.22	4.54545	18.2049	82.7497
PD2	11	0.08	0.12	0.2	5	17.3647	86.8235		PD3	11	0.08	0.14	0.22	4.54545	20.1836	91.7436
PD2	12	0.12	0.13	0.25	4	8.42135	33.6854		PD3	11	0.1	0.18	0.28	3.57143	17.6127	62.9026
PD2	12	0.05	0.16	0.21	4.7619	11.5088	54.8039		PD3	11	0.09	0.18	0.27	3.7037	18.8669	69.8774
PD2	12	0.13	0.34	0.47	2.12766	12.508	26.6128		PD3	12	0.14	0.32	0.46	2.17391	11.4138	28.7217
PD2	12	0.11	0.18	0.29	3.44828	4.1303	38.2035		PD3	12	0.17	0.56	0.73	1.36986	13.5976	21.3272
PD2	12	0.08	0.3	0.38	2.63158	14.3761	37.8319		PD3	12	0.2	0.47	0.67	1.49254	11.8111	43.851
PD2	12	0.09	0.22	0.31	3.22581	15.944	51.4321		PD3	12	0.18	0.32	0.5	2	11.6133	62.2658
PD2	12	0.1	0.2	0.3	3.33333	13.6627	45.5422		PD3	12	0.12	0.18	0.3	3.33333	7.915	26.3833
PD2	12	0.06	0.27	0.33	3.0303	9.86085	29.8813		PD3	12	0.1	0.24	0.34	2.94118	12.6157	37.1049
PD2	12	0.16	0.19	0.35	2.85714	13.2624	37.8927		PD3	12	0.06	0.31	0.37	2.7027	8.21092	22.1917
PD2	12	0.14	0.15	0.29	3.44828	14.3687	49.5473		PD3	12	0.15	0.28	0.43	2.32558	14.905	34.6628
PD2	12	0.16	0.18	0.34	2.94118	15.6677	46.0813		PD3	12	0.15	0.34	0.49	2.04082	10.0621	20.535
PD2	12	0.07	0.14	0.21	4.7619	9.31741	44.3686		PD3	12	0.07	0.21	0.28	3.57143	9.25765	33.063
PD2	12	0.06	0.16	0.22	4.54545	13.6165	61.8934		PD3	12	0.18	0.58	0.76	1.31579	13.8526	18.2271
PD2	12	0.06	0.18	0.24	4.16667	14.4495	60.2064		PD3	12	0.22	0.46	0.68	1.47059	10.3563	15.2298
PD2	12	0.13	0.17	0.3	3.33333	15.1784	50.5948		PD3	12	0.07	0.15	0.22	4.54545	6.46526	29.3875
PD2	14	0.07	0.18	0.25	4	10.1367	40.5469		PD3	12	0.06	0.32	0.38	2.63158	10.6194	27.9459
PD2	14	0.09	0.18	0.27	3.7037	12.5604	46.52		PD3	14	0.13	0.22	0.35	2.85714	18.2131	52.0375
PD2	14	0.08	0.27	0.35	2.85714	14.9119	42.6053		PD3	14	0.14	0.16	0.3	3.33333	18.1256	60.4186
PD2	14	0.08	0.18	0.26	3.84615	15.0546	57.9024		PD3	14	0.14	0.19	0.33	3.0303	15.2509	46.215
PD2	14	0.2	0.29	0.49	2.04082	14.5115	29.6152		PD3	14	0.16	0.35	0.51	1.96078	16.4542	32.2632
PD2	14	0.07	0.19	0.26	3.84615	10.0412	38.6201		PD3	14	0.11	0.26	0.37	2.7027	18.1428	49.0346
PD2	14	0.07	0.19	0.26	3.84615	17.7256	68.1754		PD3	14	0.11	0.23	0.34	2.94118	17.6257	51.8403
PD2	14	0.01	0.02	0.03	33.3333	2.05822	68.6073		PD3	14	0.09	0.27	0.36	2.77778	16.227	45.0749
PD2	14	0.08	0.14	0.22	4.54545	10.6616	48.462		PD3	14	0.12	0.24	0.36	2.77778	18.0548	50.1521
PD2	14	0.06	0.22	0.28	3.57143	9.94447	35.516		PD3	14	0.16	0.39	0.55	1.81818	16.9801	30.873
PD2	14	0.04	0.29	0.33	3.0303	5.73148	17.3681		PD3	14	0.08	0.34	0.42	2.38095	12.0747	28.7493
PD2	14	0.08	0.28	0.36	2.77778	13.2521	36.8114		PD3	14	0.09	0.36	0.45	2.22222	7.71061	17.1347
PD2	14	0.09	0.22	0.31	3.22581	8.83039	28.4851		PD3	14	0.14	0.42	0.56	1.78571	17.449	31.1589
PD2	14	0.05	0.16	0.21	4.7619	8.8444	42.1162		PD3	14	0.08	0.25	0.33	3.0303	11.5048	34.8632
PD2	14	0.08	0.21	0.29	3.44828	11.9912	41.349		PD3	14	0.11	0.28	0.39	2.5641	18.4847	47.3967
PD2	15	0.06	0.21	0.27	3.7037	12.8247	47.499		PD3	14	0.09	0.24	0.33	3.0303	12.2307	37.0628
PD2	15	0.1	0.22	0.32	3.125	18.0933	56.5417		PD3	15	0.12	0.23	0.35	2.85714	19.4352	55.5293
PD2	15	0.11	0.19	0.3	3.33333	18.1476	60.492		PD3	15	0.18	0.21	0.39	2.5641	20.2858	52.0147
PD2	15	0.1	0.24	0.34	2.94118	17.3377	50.9931		PD3	15	0.15	0.22	0.37	2.7027	20.6514	55.8147
PD2	15	0.09	0.19	0.28	3.57143	19.3927	69.2596		PD3	15	0.14	0.22	0.36	2.77778	19.1832	53.2865
PD2	15	0.07	0.21	0.28	3.57143	15.3685	54.8875		PD3	15	0.12	0.29	0.41	2.43902	16.0717	39.1992
PD2	15	0.11	0.15	0.26	3.84615	20.7564	79.8322		PD3	15	0.18	0.31	0.49	2.04082	20.7177	42.2811
PD2	15	0.08	0.19	0.27	3.7037	18.0204	66.7421		PD3	15	0.15	0.29	0.44	2.27273	16.9337	38.4857
PD2	15	0.08	0.14	0.22	4.54545	17.4234	79.1973		PD3	15	0.11	0.26	0.37	2.7027	18.7166	50.5854
PD2	15	0.07	0.14	0.21	4.7619	15.374	73.2093		PD3	15	0.13	0.2	0.33	3.0303	20.5922	62.4007
PD2	15	0.12	0.18	0.3	3.33333	21.2192	70.7305		PD3	15	0.09	0.17	0.26	3.84615	16.5887	63.8029
PD2	15	0.09	0.17	0.26	3.84615	16.1135	61.9749		PD3	15	0.14	0.2	0.34	2.94118	21.5971	63.5208
PD2	15	0.07	0.16	0.23	4.34783	16.6857	72.5463		PD3	15	0.11	0.19	0.3	3.33333	19.6288	65.4295
PD2	15	0.08	0.22	0.3	3.33333	16.2493	54.1645		PD3	15	0.12	0.18	0.3	3.33333	20.8481	69.4935
									PD3	15	0.13	0.2	0.33	3.0303	20.1664	61.1102
									PD3	15	0.11	0.24	0.35	2.85714	15.5669	44.4769

## Sheet: Post-Inj Spatiotemporal Dox
Time point	Animal ID	Swing Time	Stance Time	Stride Time	Stride Frequency	Stride Distance	Speed		Time point	Animal ID	Swing Time	Stance Time	Stride Time	Stride Frequency	Stride Distance	Speed		Time point	Animal ID	Swing Time	Stance Time	Stride Time	Stride Frequency	Stride Distance	Speed		Time point	Animal ID	Swing Time	Stance Time	Stride Time	Stride Frequency	Stride Distance	Speed
D2D5	1	0.11	0.16	0.27	3.7037	17.5004	64.8162		D2D8	1	0.12	0.17	0.29	3.44828	16.4189	56.6167		D3D8	1	0.08	0.22	0.3	3.33333	14.6752	48.9174		D3D20	1	0.1	0.16	0.26	3.84615	10.4781	40.3006
D2D5	1	0.12	0.18	0.3	3.33333	16.8302	56.1008		D2D8	1	0.1	0.17	0.27	3.7037	16.667	61.7296		D3D8	1	0.11	0.18	0.29	3.44828	19.3436	66.7021		D3D20	1	0.09	0.29	0.38	2.63158	12.3109	32.3972
D2D5	1	0.08	0.19	0.27	3.7037	12.8664	47.6532		D2D8	1	0.11	0.18	0.29	3.44828	16.7279	57.6826		D3D8	1	0.12	0.13	0.25	4	18.1397	72.5589		D3D20	1	0.09	0.2	0.29	3.44828	10.7399	37.0341
D2D5	1	0.12	0.15	0.27	3.7037	18.6585	69.1055		D2D8	1	0.1	0.15	0.25	4	18.1118	72.4471		D3D8	1	0.11	0.14	0.25	4	17.2774	69.1098		D3D20	1	0.1	0.17	0.27	3.7037	10.6961	39.6151
D2D5	1	0.1	0.18	0.28	3.57143	18.1328	64.7599		D2D8	1	0.12	0.12	0.24	4.16667	18.5005	77.0855		D3D8	1	0.11	0.19	0.3	3.33333	15.6703	52.2343		D3D20	1	0.1	0.18	0.28	3.57143	14.2564	50.9155
D2D5	1	0.12	0.12	0.24	4.16667	20.8569	86.9037		D2D8	1	0.11	0.13	0.24	4.16667	19.196	79.9833		D3D8	1	0.1	0.18	0.28	3.57143	16.2957	58.199		D3D20	1	0.09	0.14	0.23	4.34783	14.3222	62.2703
D2D5	1	0.13	0.14	0.27	3.7037	16.8382	62.3635		D2D8	1	0.1	0.18	0.28	3.57143	15.6982	56.0648		D3D8	1	0.12	0.19	0.31	3.22581	17.1492	55.3199		D3D20	1	0.13	0.17	0.3	3.33333	13.4834	44.9448
D2D5	1	0.09	0.07	0.16	6.25	17.4733	109.208		D2D8	1	0.11	0.17	0.28	3.57143	17.4975	62.4911		D3D8	1	0.11	0.17	0.28	3.57143	16.0397	57.2845		D3D20	1	0.1	0.16	0.26	3.84615	15.22	58.5385
D2D5	1	0.06	0.13	0.19	5.26316	15.3056	80.5556		D2D8	1	0.12	0.23	0.35	2.85714	14.6905	41.9729		D3D8	1	0.09	0.16	0.25	4	15.2372	60.9489		D3D20	1	0.08	0.17	0.25	4	14.0457	56.1829
D2D5	1	0.09	0.12	0.21	4.7619	12.8419	61.1518		D2D8	1	0.11	0.2	0.31	3.22581	16.6173	53.6043		D3D8	1	0.1	0.16	0.26	3.84615	17.892	68.8155		D3D20	1	0.1	0.19	0.29	3.44828	12.6209	43.5204
D2D5	1	0.04	0.06	0.1	10	10.4412	104.412		D2D8	1	0.13	0.13	0.26	3.84615	18.0852	69.5585		D3D8	1	0.06	0.1	0.16	6.25	13.0801	81.7507		D3D20	1	0.09	0.22	0.31	3.22581	14.4312	46.5522
D2D5	1	0.06	0.13	0.19	5.26316	13.6086	71.6243		D2D8	1	0.13	0.15	0.28	3.57143	16.9193	60.4261		D3D8	1	0.11	0.13	0.24	4.16667	16.8397	70.1652		D3D20	1	0.12	0.21	0.33	3.0303	15.2998	46.3629
D2D5	1	0.07	0.12	0.19	5.26316	17.5305	92.2658		D2D8	1	0.08	0.17	0.25	4	15.5279	62.1115		D3D8	1	0.06	0.14	0.2	5	10.305	51.5248		D3D20	1	0.1	0.2	0.3	3.33333	13.3187	44.3956
D2D5	3	0.11	0.18	0.29	3.44828	16.7204	57.6567		D2D8	1	0.1	0.17	0.27	3.7037	18.2227	67.4915		D3D8	1	0.12	0.19	0.31	3.22581	16.7242	53.9489		D3D20	1	0.09	0.14	0.23	4.34783	9.35265	40.6637
D2D5	3	0.12	0.24	0.36	2.77778	15.9909	44.4191		D2D8	3	0.12	0.21	0.33	3.0303	17.887	54.2032		D3D8	1	0.1	0.2	0.3	3.33333	13.0124	43.3746		D3D20	1	0.1	0.18	0.28	3.57143	14.6577	52.3491
D2D5	3	0.17	0.21	0.38	2.63158	19.7713	52.0297		D2D8	3	0.11	0.23	0.34	2.94118	19.0909	56.1497		D3D8	3	0.09	0.19	0.28	3.57143	15.6649	55.9461		D3D20	3	0.1	0.16	0.26	3.84615	17.8975	68.8366
D2D5	3	0.08	0.22	0.3	3.33333	15.6894	52.2979		D2D8	3	0.12	0.21	0.33	3.0303	19.3238	58.5571		D3D8	3	0.11	0.21	0.32	3.125	16.5355	51.6733		D3D20	3	0.1	0.14	0.24	4.16667	19.0058	79.191
D2D5	3	0.05	0.17	0.22	4.54545	10.7664	48.9384		D2D8	3	0.13	0.21	0.34	2.94118	20.2542	59.5713		D3D8	3	0.11	0.18	0.29	3.44828	18.1978	62.7509		D3D20	3	0.09	0.17	0.26	3.84615	17.5401	67.4619
D2D5	3	0.11	0.22	0.33	3.0303	16.5884	50.2678		D2D8	3	0.08	0.43	0.51	1.96078	11.4216	22.3952		D3D8	3	0.06	0.16	0.22	4.54545	15.5909	70.8678		D3D20	3	0.07	0.16	0.23	4.34783	14.8343	64.4972
D2D5	3	0.12	0.19	0.31	3.22581	17.4956	56.4373		D2D8	3	0.1	0.3	0.4	2.5	18.3045	45.7613		D3D8	3	0.07	0.16	0.23	4.34783	15.0493	65.4318		D3D20	3	0.09	0.17	0.26	3.84615	15.8722	61.0467
D2D5	3	0.15	0.32	0.47	2.12766	15.3067	32.5673		D2D8	3	0.15	0.21	0.36	2.77778	18.6838	51.8994		D3D8	3	0.1	0.17	0.27	3.7037	18.0762	66.9487		D3D20	3	0.08	0.17	0.25	4	16.8874	67.5498
D2D5	3	0.1	0.28	0.38	2.63158	15.1105	39.7644		D2D8	3	0.11	0.18	0.29	3.44828	17.46	60.2068		D3D8	3	0.12	0.19	0.31	3.22581	17.2181	55.5424		D3D20	3	0.1	0.18	0.28	3.57143	18.5057	66.0917
D2D5	3	0.06	0.34	0.4	2.5	13.1342	32.8354		D2D8	3	0.08	0.19	0.27	3.7037	16.352	60.563		D3D8	3	0.1	0.21	0.31	3.22581	18.0054	58.0819		D3D20	3	0.13	0.16	0.29	3.44828	19.0362	65.6422
D2D5	3	0.12	0.25	0.37	2.7027	16.3958	44.313		D2D8	3	0.13	0.16	0.29	3.44828	18.9015	65.1775		D3D8	3	0.1	0.19	0.29	3.44828	17.7805	61.3119		D3D20	3	0.07	0.17	0.24	4.16667	14.5423	60.5931
D2D5	3	0.14	0.32	0.46	2.17391	15.9556	34.686		D2D8	3	0.16	0.17	0.33	3.0303	16.7864	50.868		D3D8	3	0.1	0.17	0.27	3.7037	17.5815	65.1165		D3D20	3	0.12	0.21	0.33	3.0303	16.3902	49.6672
D2D5	3	0.12	0.33	0.45	2.22222	13.9254	30.9453		D2D8	3	0.12	0.22	0.34	2.94118	17.7478	52.1993		D3D8	3	0.1	0.16	0.26	3.84615	18.3156	70.4447		D3D20	3	0.1	0.17	0.27	3.7037	18.7608	69.4846
D2D5	3	0.08	0.21	0.29	3.44828	14.9572	51.5766		D2D8	3	0.12	0.17	0.29	3.44828	20.2822	69.9387		D3D8	3	0.13	0.21	0.34	2.94118	17.3179	50.935		D3D20	3	0.13	0.18	0.31	3.22581	21.5379	69.4772
D2D5	3	0.12	0.21	0.33	3.0303	19.7203	59.7585		D2D8	3	0.12	0.24	0.36	2.77778	17.7472	49.2979		D3D8	3	0.14	0.17	0.31	3.22581	18.3452	59.1781		D3D20	4	0.1	0.14	0.24	4.16667	20.0461	83.5254
D2D5	4	0.13	0.22	0.35	2.85714	20.6875	59.1071		D2D8	4	0.09	0.28	0.37	2.7027	16.5015	44.5985		D3D8	4	0.09	0.3	0.39	2.5641	13.5304	34.6933		D3D20	4	0.12	0.15	0.27	3.7037	21.9237	81.1988
D2D5	4	0.13	0.2	0.33	3.0303	17.5825	53.2802		D2D8	4	0.12	0.24	0.36	2.77778	16.8042	46.6784		D3D8	4	0.11	0.2	0.31	3.22581	19.6967	63.5379		D3D20	4	0.12	0.18	0.3	3.33333	20.0531	66.8435
D2D5	4	0.1	0.24	0.34	2.94118	18.0851	53.1915		D2D8	4	0.09	0.29	0.38	2.63158	14.8392	39.0504		D3D8	4	0.12	0.2	0.32	3.125	18.7014	58.442		D3D20	4	0.12	0.16	0.28	3.57143	19.9217	71.1488
D2D5	4	0.11	0.25	0.36	2.77778	18.8982	52.495		D2D8	4	0.11	0.29	0.4	2.5	17.4198	43.5496		D3D8	4	0.1	0.16	0.26	3.84615	21.0536	80.9753		D3D20	4	0.12	0.21	0.33	3.0303	18.6326	56.4624
D2D5	4	0.1	0.21	0.31	3.22581	19.0028	61.2994		D2D8	4	0.11	0.2	0.31	3.22581	19.6339	63.3353		D3D8	4	0.1	0.14	0.24	4.16667	21.6104	90.0431		D3D20	4	0.11	0.2	0.31	3.22581	18.1903	58.6783
D2D5	4	0.11	0.22	0.33	3.0303	16.8795	51.1502		D2D8	4	0.11	0.27	0.38	2.63158	14.7088	38.7073		D3D8	4	0.1	0.17	0.27	3.7037	19.6801	72.8894		D3D20	4	0.12	0.21	0.33	3.0303	18.9318	57.3691
D2D5	4	0.11	0.2	0.31	3.22581	17.5638	56.6575		D2D8	4	0.13	0.37	0.5	2	17.0503	34.1005		D3D8	4	0.09	0.24	0.33	3.0303	15.0511	45.6094		D3D20	4	0.12	0.18	0.3	3.33333	19.1827	63.9424
D2D5	4	0.09	0.21	0.3	3.33333	17.4374	58.1246		D2D8	4	0.11	0.24	0.35	2.85714	17.0817	48.805		D3D8	4	0.1	0.26	0.36	2.77778	18.2664	50.7401		D3D20	4	0.13	0.14	0.27	3.7037	19.9216	73.7836
D2D5	4	0.11	0.24	0.35	2.85714	18.3061	52.3032		D2D8	4	0.1	0.21	0.31	3.22581	17.1643	55.3688		D3D8	4	0.1	0.18	0.28	3.57143	18.8466	67.3092		D3D20	4	0.13	0.17	0.3	3.33333	18.0722	60.2408
D2D5	4	0.11	0.24	0.35	2.85714	16.0443	45.841		D2D8	4	0.11	0.21	0.32	3.125	18.8518	58.9117		D3D8	4	0.09	0.18	0.27	3.7037	17.4771	64.7301		D3D20	4	0.14	0.17	0.31	3.22581	18.5869	59.9577
D2D5	4	0.11	0.25	0.36	2.77778	18.5003	51.3898		D2D8	4	0.11	0.21	0.32	3.125	18.2675	57.0858		D3D8	4	0.1	0.2	0.3	3.33333	17.0899	56.9663		D3D20	4	0.11	0.18	0.29	3.44828	17.9802	62.0006
D2D5	4	0.09	0.25	0.34	2.94118	17.0055	50.0161		D2D8	4	0.12	0.24	0.36	2.77778	18.4604	51.2789		D3D8	4	0.1	0.18	0.28	3.57143	18.4525	65.9016		D3D20	6	0.09	0.24	0.33	3.0303	17.3832	52.6765
D2D5	4	0.11	0.27	0.38	2.63158	16.884	44.4316		D2D8	4	0.11	0.21	0.32	3.125	18.0087	56.2771		D3D8	6	0.12	0.16	0.28	3.57143	20.3641	72.729		D3D20	6	0.09	0.16	0.25	4	19.1715	76.6859
D2D5	4	0.1	0.25	0.35	2.85714	16.6528	47.5795		D2D8	4	0.14	0.22	0.36	2.77778	18.0754	50.2096		D3D8	6	0.11	0.15	0.26	3.84615	18.6255	71.6365		D3D20	6	0.14	0.15	0.29	3.44828	19.496	67.2276
D2D5	4	0.11	0.24	0.35	2.85714	18.2489	52.1397		D2D8	6	0.09	0.19	0.28	3.57143	16.7011	59.6468		D3D8	6	0.14	0.15	0.29	3.44828	12.5355	43.2259		D3D20	6	0.1	0.14	0.24	4.16667	18.5066	77.1108
D2D5	6	0.09	0.18	0.27	3.7037	18.1025	67.0462		D2D8	6	0.07	0.18	0.25	4	17.5908	70.3634		D3D8	6	0.13	0.2	0.33	3.0303	19.0322	57.6733		D3D20	6	0.1	0.15	0.25	4	18.1524	72.6096
D2D5	6	0.13	0.19	0.32	3.125	21.8374	68.242		D2D8	6	0.15	0.21	0.36	2.77778	16.1135	44.7596		D3D8	6	0.14	0.18	0.32	3.125	15.4118	48.162		D3D20	6	0.05	0.07	0.12	8.33333	10.7201	89.334
D2D5	6	0.07	0.15	0.22	4.54545	16.4496	74.7709		D2D8	6	0.12	0.21	0.33	3.0303	19.0556	57.7442		D3D8	6	0.1	0.24	0.34	2.94118	15.6528	46.0376		D3D20	6	0.11	0.17	0.28	3.57143	18.1546	64.838
D2D5	6	0.04	0.2	0.24	4.16667	5.25692	21.9038		D2D8	6	0.09	0.16	0.25	4	18.2759	73.1035		D3D8	6	0.09	0.23	0.32	3.125	15.6584	48.9326		D3D20	6	0.06	0.3	0.36	2.77778	10.8767	30.2131
D2D5	6	0.13	0.24	0.37	2.7027	19.412	52.465		D2D8	6	0.07	0.14	0.21	4.7619	15.6059	74.3137		D3D8	6	0.11	0.23	0.34	2.94118	16.7448	49.2493		D3D20	6	0.09	0.26	0.35	2.85714	17.6814	50.5182
D2D5	6	0.07	0.28	0.35	2.85714	9.07949	25.9414		D2D8	6	0.1	0.2	0.3	3.33333	17.7685	59.2283		D3D8	6	0.1	0.18	0.28	3.57143	15.8403	56.5726		D3D20	6	0.08	0.27	0.35	2.85714	15.5456	44.416
D2D5	6	0.14	0.2	0.34	2.94118	22.8744	67.2777		D2D8	6	0.11	0.18	0.29	3.44828	18.4836	63.7365		D3D8	6	0.13	0.19	0.32	3.125	18.7469	58.5839		D3D20	6	0.12	0.16	0.28	3.57143	19.2937	68.9061
D2D5	6	0.05	0.15	0.2	5	9.65644	48.2822		D2D8	6	0.09	0.15	0.24	4.16667	19.5897	81.6236		D3D8	6	0.09	0.23	0.32	3.125	14.3786	44.9332		D3D20	6	0.09	0.14	0.23	4.34783	18.7254	81.4149
D2D5	6	0.09	0.18	0.27	3.7037	17.4364	64.5793		D2D8	6	0.12	0.15	0.27	3.7037	17.4116	64.4874		D3D8	6	0.07	0.19	0.26	3.84615	14.2185	54.6867		D3D20	6	0.11	0.15	0.26	3.84615	17.8452	68.6353
D2D5	6	0.12	0.18	0.3	3.33333	20.2847	67.6158		D2D8	6	0.11	0.19	0.3	3.33333	16.3587	54.529		D3D8	6	0.04	0.15	0.19	5.26316	18.2012	70.0045		D3D20	6	0.08	0.15	0.23	4.34783	15.5314	67.5279
D2D5	6	0.07	0.12	0.19	5.26316	13.7144	72.1811		D2D8	6	0.11	0.2	0.31	3.22581	15.9799	51.5482		D3D8	6	0.11	0.21	0.32	3.125	16.5091	51.591		D3D20	7	0.1	0.18	0.28	3.57143	17.5379	62.6355
D2D5	6	0.08	0.19	0.27	3.7037	13.3174	49.3238		D2D8	6	0.12	0.25	0.37	2.7027	18.1747	49.1207		D3D8	7	0.11	0.2	0.31	3.22581	17.2723	55.7172		D3D20	7	0.12	0.17	0.29	3.44828	20.5037	70.7023
D2D5	7	0.06	0.11	0.17	5.88235	7.25423	42.672		D2D8	6	0.1	0.16	0.26	3.84615	18.3194	70.4592		D3D8	7	0.13	0.22	0.35	2.85714	17.697	50.5627		D3D20	7	0.06	0.1	0.16	6.25	11.0609	69.1305
D2D5	7	0.1	0.31	0.41	2.43902	13.3672	32.6029		D2D8	6	0.11	0.15	0.26	3.84615	19.9396	76.6909		D3D8	7	0.12	0.27	0.39	2.5641	19.4787	49.9453		D3D20	7	0.1	0.25	0.35	2.85714	14.8223	42.3493
D2D5	7	0.09	0.29	0.38	2.63158	16.4766	43.3594		D2D8	7	0.15	0.3	0.45	2.22222	21.6291	48.0648		D3D8	7	0.1	0.24	0.34	2.94118	14.1584	41.6425		D3D20	7	0.09	0.28	0.37	2.7027	14.6627	39.629
D2D5	7	0.09	0.12	0.21	4.7619	22.6073	107.654		D2D8	7	0.12	0.19	0.31	3.22581	19.4214	62.6498		D3D8	7	0.14	0.2	0.34	2.94118	13.4665	39.6073		D3D20	7	0.09	0.26	0.35	2.85714	15.3696	43.9132
D2D5	7	0.07	0.1	0.17	5.88235	16.9045	99.438		D2D8	7	0.06	0.11	0.17	5.88235	14.0745	82.7909		D3D8	7	0.12	0.2	0.32	3.125	15.8002	49.3756		D3D20	7	0.11	0.23	0.34	2.94118	19.9429	58.6556
D2D5	7	0.1	0.16	0.26	3.84615	16.7884	64.5709		D2D8	7	0.18	0.21	0.39	2.5641	20.2745	51.9859		D3D8	7	0.12	0.24	0.36	2.77778	16.7674	46.576		D3D20	7	0.12	0.18	0.3	3.33333	19.3939	64.6462
D2D5	7	0.12	0.17	0.29	3.44828	16.261	56.0725		D2D8	7	0.09	0.25	0.34	2.94118	13.4919	39.6821		D3D8	7	0.11	0.2	0.31	3.22581	15.5494	50.1592		D3D20	7	0.18	0.24	0.42	2.38095	15.8022	37.6243
D2D5	7	0.08	0.22	0.3	3.33333	15.4497	51.4989		D2D8	7	0.1	0.26	0.36	2.77778	14.9425	41.5069		D3D8	7	0.1	0.23	0.33	3.0303	17.385	52.6819		D3D20	7	0.12	0.14	0.26	3.84615	14.9144	57.3631
D2D5	7	0.08	0.2	0.28	3.57143	16.4923	58.9011		D2D8	7	0.11	0.24	0.35	2.85714	15.1844	43.3841		D3D8	7	0.1	0.31	0.41	2.43902	15.9639	38.9364		D3D20	7	0.1	0.24	0.34	2.94118	16.4354	48.3394
D2D5	7	0.13	0.19	0.32	3.125	17.7724	55.5387		D2D8	7	0.06	0.2	0.26	3.84615	12.5991	48.4582		D3D8	7	0.11	0.29	0.4	2.5	17.0761	42.6903		D3D20	7	0.07	0.12	0.19	5.26316	6.88211	36.2216
D2D5	7	0.12	0.32	0.44	2.27273	19.5944	44.5327		D2D8	7	0.05	0.17	0.22	4.54545	11.3947	51.7942		D3D8	7	0.09	0.23	0.32	3.125	13.0543	40.7947		D3D20	7	0.13	0.24	0.37	2.7027	18.236	49.2864
D2D5	7	0.1	0.22	0.32	3.125	16.6267	51.9583		D2D8	7	0.14	0.21	0.35	2.85714	17.6394	50.3983		D3D8	7	0.09	0.23	0.32	3.125	13.2249	41.3277		D3D20	7	0.09	0.29	0.38	2.63158	14.7295	38.7618
D2D5	7	0.1	0.21	0.31	3.22581	17.3861	56.0841		D2D8	7	0.13	0.21	0.34	2.94118	21.1641	62.2475		D3D8	7	0.15	0.41	0.56	1.78571	13.5518	24.1997		D3D20	9	0.09	0.23	0.32	3.125	17.0903	53.4073
D2D5	7	0.12	0.22	0.34	2.94118	18.1769	53.4615		D2D8	7	0.11	0.21	0.32	3.125	14.6594	45.8106		D3D8	9	0.08	0.19	0.27	3.7037	17.4957	64.7989		D3D20	9	0.14	0.2	0.34	2.94118	19.5667	57.5492
D2D5	7	0.12	0.27	0.39	2.5641	17.322	44.4155		D2D8	9	0.06	0.26	0.32	3.125	13.5119	46.5929		D3D8	9	0.09	0.17	0.26	3.84615	19.0933	73.4358		D3D20	9	0.09	0.23	0.32	3.125	15.4185	48.1827
D2D5	9	0.07	0.21	0.28	3.57143	12.8931	46.0467		D2D8	9	0.06	0.25	0.31	3.22581	11.8084	36.9014		D3D8	9	0.08	0.19	0.27	3.7037	16.5418	61.2661		D3D20	9	0.09	0.21	0.3	3.33333	16.8463	56.1544
D2D5	9	0.1	0.19	0.29	3.44828	14.5911	50.3142		D2D8	9	0.08	0.18	0.26	3.84615	11.9809	36.3058		D3D8	9	0.18	0.22	0.4	2.5	20.4073	51.0183		D3D20	9	0.08	0.21	0.29	3.44828	17.0335	58.7361
D2D5	9	0.06	0.23	0.29	3.44828	12.8257	44.2265		D2D8	9	0.13	0.19	0.32	3.125	15.9322	49.7881		D3D8	9	0.1	0.11	0.21	4.7619	13.2632	63.1579		D3D20	9	0.08	0.11	0.19	5.26316	11.2522	59.2223
D2D5	9	0.09	0.2	0.29	3.44828	15.4795	53.3778		D2D8	9	0.07	0.15	0.22	4.54545	6.45957	29.3617		D3D8	9	0.12	0.18	0.3	3.33333	15.0006	50.0019		D3D20	9	0.11	0.2	0.31	3.22581	17.0469	54.9901
D2D5	9	0.08	0.25	0.33	3.0303	15.1769	45.9906		D2D8	9	0.06	0.21	0.27	3.7037	13.6679	50.6218		D3D8	9	0.11	0.2	0.31	3.22581	16.859	54.3839		D3D20	9	0.09	0.22	0.31	3.22581	17.0441	54.9811
D2D5	9	0.06	0.19	0.25	4	12.5343	50.1372		D2D8	9	0.1	0.22	0.32	3.125	13.3722	41.7882		D3D8	9	0.12	0.12	0.24	4.16667	10.6567	44.4028		D3D20	9	0.09	0.23	0.32	3.125	14.9892	46.8412
D2D5	9	0.06	0.14	0.2	5	10.3423	51.7115		D2D8	9	0.1	0.3	0.4	2.5	13.5325	33.8312		D3D8	9	0.11	0.27	0.38	2.63158	13.8839	36.5365		D3D20	9	0.08	0.24	0.32	3.125	15.2553	47.6728
D2D5	9	0.08	0.25	0.33	3.0303	14.8317	44.9447		D2D8	9	0.07	0.19	0.26	3.84615	17.8476	68.6446		D3D8	9	0.12	0.24	0.36	2.77778	14.8644	41.29		D3D20	9	0.1	0.24	0.34	2.94118	15.9056	46.781
D2D5	9	0.06	0.22	0.28	3.57143	13.7078	48.9565		D2D8	9	0.1	0.19	0.29	3.44828	17.8479	61.5444		D3D8	9	0.12	0.19	0.31	3.22581	13.9299	44.9351		D3D20	9	0.11	0.12	0.23	4.34783	20.8054	90.4581
D2D5	9	0.06	0.3	0.36	2.77778	13.9181	38.6613		D2D8	9	0.11	0.24	0.35	2.85714	16.0538	45.8681		D3D8	9	0.09	0.15	0.24	4.16667	15.8497	66.0404		D3D20	9	0.1	0.16	0.26	3.84615	17.2757	66.4451
D2D5	9	0.06	0.25	0.31	3.22581	11.239	36.2548		D2D8	9	0.1	0.22	0.32	3.125	17.3833	54.3229		D3D8	9	0.14	0.21	0.35	2.85714	17.7476	50.7074		D3D20	9	0.08	0.18	0.26	3.84615	14.4894	55.7285
D2D5	9	0.1	0.28	0.38	2.63158	12.5434	33.0091		D2D8	9	0.04	0.19	0.23	4.34783	11.2141	135.321		D3D8	9	0.08	0.27	0.35	2.85714	13.4557	38.4448		D3D20	9	0.09	0.15	0.24	4.16667	16.2878	67.866
D2D5	9	0.07	0.26	0.33	3.0303	15.1191	45.8153		D2D8	9	0.09	0.18	0.27	3.7037	17.6748	65.4623		D3D8	11	0.1	0.24	0.34	2.94118	14.5117	42.6813		D3D20	14	0.11	0.25	0.36	2.77778	17.6048	48.9023
D2D5	11	0.08	0.19	0.27	3.7037	13.2335	49.0129		D2D8	9	0.1	0.2	0.3	3.33333	16.5366	55.1221		D3D8	11	0.1	0.17	0.27	3.7037	17.35	64.2592		D3D20	14	0.09	0.16	0.25	4	14.975	59.9002
D2D5	11	0.07	0.14	0.21	4.7619	10.5935	50.4452		D2D8	11	0.1	0.2	0.3	3.33333	13.8919	46.3064		D3D8	11	0.07	0.21	0.28	3.57143	16.346	58.3787		D3D20	14	0.07	0.17	0.24	4.16667	13.1105	54.6272
D2D5	11	0.1	0.21	0.31	3.22581	16.2377	52.3797		D2D8	11	0.1	0.19	0.29	3.44828	16.4592	56.7558		D3D8	11	0.07	0.21	0.28	3.57143	14.9221	53.2933		D3D20	14	0.14	0.23	0.37	2.7027	15.7349	42.5268
D2D5	11	0.07	0.19	0.26	3.84615	13.0845	50.3249		D2D8	11	0.09	0.22	0.31	3.22581	13.3381	43.026		D3D8	11	0.1	0.19	0.29	3.44828	17.1707	59.2094		D3D20	14	0.07	0.2	0.27	3.7037	12.134	44.9408
D2D5	11	0.1	0.17	0.27	3.7037	16.5359	61.2442		D2D8	11	0.08	0.19	0.27	3.7037	15.2865	56.6167		D3D8	11	0.09	0.2	0.29	3.44828	14.6476	50.5091		D3D20	14	0.12	0.25	0.37	2.7027	15.2309	41.1645
D2D5	11	0.1	0.19	0.29	3.44828	17.7058	61.0546		D2D8	11	0.09	0.19	0.28	3.57143	16.7459	59.8069		D3D8	11	0.07	0.12	0.19	5.26316	11.4747	60.3932		D3D20	14	0.13	0.25	0.38	2.63158	15.4127	40.5597
D2D5	11	0.1	0.18	0.28	3.57143	7.32537	26.162		D2D8	11	0.09	0.2	0.29	3.44828	15.25	52.5863		D3D8	11	0.1	0.21	0.31	3.22581	18.4825	59.6208		D3D20	14	0.11	0.29	0.4	2.5	15.2459	38.1148
D2D5	11	0.07	0.23	0.3	3.33333	12.6194	42.0646		D2D8	11	0.09	0.33	0.42	2.38095	14.1245	33.6298		D3D8	11	0.07	0.2	0.27	3.7037	15.2561	56.5039		D3D20	14	0.13	0.22	0.35	2.85714	18.0618	51.6051
D2D5	11	0.08	0.23	0.31	3.22581	14.103	45.4934		D2D8	11	0.1	0.24	0.34	2.94118	15.3113	45.0331		D3D8	11	0.09	0.2	0.29	3.44828	16.8992	58.2732		D3D20	14	0.13	0.24	0.37	2.7027	16.597	44.8568
D2D5	11	0.07	0.24	0.31	3.22581	11.301	36.4549		D2D8	11	0.09	0.22	0.31	3.22581	16.2202	52.3232		D3D8	11	0.07	0.24	0.31	3.22581	15.8016	50.9727		D3D20	14	0.11	0.16	0.27	3.7037	18.3734	68.0496
D2D5	11	0.05	0.15	0.2	5	10.4296	52.1481		D2D8	11	0.09	0.14	0.23	4.34783	12.2646	53.3245		D3D8	11	0.08	0.25	0.33	3.0303	15.0934	45.7377		D3D20	14	0.12	0.17	0.29	3.44828	18.2569	62.9549
D2D5	11	0.07	0.15	0.22	4.54545	11.7904	53.5927		D2D8	11	0.1	0.18	0.28	3.57143	14.1826	50.6521		D3D8	11	0.06	0.23	0.29	3.44828	13.8276	47.6815		D3D20	14	0.15	0.23	0.38	2.63158	15.8111	41.608
D2D5	11	0.08	0.2	0.28	3.57143	16.4923	58.9011		D2D8	11	0.11	0.23	0.34	2.94118	15.1814	44.651		D3D8	11	0.07	0.18	0.25	4	16.1246	64.4986		D3D20	14	0.11	0.22	0.33	3.0303	15.7739	47.7997
D2D5	11	0.09	0.22	0.31	3.22581	17.0265	54.9242		D2D8	11	0.17	0.18	0.35	2.85714	8.90219	29.674		D3D8	11	0.1	0.19	0.29	3.44828	16.834	58.0482		D3D20	14	0.12	0.24	0.36	2.77778	15.8999	44.1663
D2D5	12	0.1	0.22	0.32	3.125	19.097	59.6781		D2D8	11	0.12	0.15	0.27	3.7037	8.55123	32.8894		D3D8	12	0.17	0.32	0.49	2.04082	14.7083	30.0169		D3D20	15	0.12	0.18	0.3	3.33333	19.6239	65.4129
D2D5	12	0.11	0.21	0.32	3.125	18.5342	57.9194		D2D8	11	0.11	0.3	0.41	2.43902	9.55564	25.8261		D3D8	12	0.09	0.31	0.4	2.5	13.044	32.6101		D3D20	15	0.11	0.17	0.28	3.57143	19.2586	68.7808
D2D5	12	0.19	0.21	0.4	2.5	21.7032	54.258		D2D8	12	0.19	0.23	0.42	2.38095	16.5701	39.4526		D3D8	12	0.1	0.46	0.56	1.78571	12.322	22.0036		D3D20	15	0.11	0.21	0.32	3.125	17.9102	55.9693
D2D5	12	0.11	0.18	0.29	3.44828	17.3779	59.9238		D2D8	12	0.14	0.22	0.36	2.77778	17.8484	49.5788		D3D8	12	0.13	0.27	0.4	2.5	15.6169	39.0422		D3D20	15	0.14	0.17	0.31	3.22581	20.1882	65.1232
D2D5	12	0.1	0.43	0.53	1.88679	14.9931	28.289		D2D8	12	0.11	0.21	0.32	3.125	17.2724	53.9762		D3D8	12	0.16	0.28	0.44	2.27273	17.0596	38.7719		D3D20	15	0.13	0.15	0.28	3.57143	19.8775	70.9911
D2D5	12	0.09	0.26	0.35	2.85714	15.8825	45.3786		D2D8	12	0.06	0.12	0.18	5.55556	6.92209	38.456		D3D8	12	0.11	0.36	0.47	2.12766	16.4145	34.9245		D3D20	15	0.12	0.15	0.27	3.7037	19.5745	72.4983
D2D5	12	0.13	0.25	0.38	2.63158	15.8866	41.8068		D2D8	12	0.13	0.15	0.28	3.57143	13.5579	48.421		D3D8	12	0.1	0.3	0.4	2.5	10.1249	25.3122		D3D20	15	0.11	0.18	0.29	3.44828	18.7293	64.5839
D2D5	12	0.12	0.38	0.5	2	14.8742	29.7484		D2D8	12	0.15	0.19	0.34	2.94118	15.6411	46.0031		D3D8	12	0.1	0.22	0.32	3.125	9.50286	29.6964		D3D20	15	0.08	0.15	0.23	4.34783	15.433	67.0998
D2D5	12	0.13	0.4	0.53	1.88679	15.5551	29.3493		D2D8	12	0.11	0.2	0.31	3.22581	15.3144	49.4012		D3D8	12	0.11	0.37	0.48	2.08333	16.3698	34.1037		D3D20	15	0.14	0.18	0.32	3.125	20.2548	63.2961
D2D5	12	0.14	0.32	0.46	2.17391	13.3875	29.1032		D2D8	12	0.11	0.24	0.35	2.85714	17.2504	43.1261		D3D8	12	0.1	0.32	0.42	2.38095	16.3511	38.9311		D3D20	15	0.11	0.17	0.28	3.57143	19.3194	68.9978
D2D5	12	0.1	0.32	0.42	2.38095	15.7635	37.5322		D2D8	12	0.09	0.15	0.24	4.16667	11.8306	35.8502		D3D8	12	0.08	0.39	0.47	2.12766	10.0473	21.3772		D3D20	15	0.1	0.18	0.28	3.57143	15.4192	55.0685
D2D5	12	0.11	0.28	0.39	2.5641	14.385	36.8846		D2D8	12	0.07	0.18	0.25	4	8.38434	33.5374		D3D8	12	0.08	0.17	0.25	4	7.78828	31.1531		D3D20	15	0.12	0.19	0.31	3.22581	20.5139	66.1739
D2D5	14	0.11	0.17	0.28	3.57143	16.3197	58.2846		D2D8	12	0.08	0.18	0.26	3.84615	10.2333	39.359		D3D8	12	0.1	0.31	0.41	2.43902	14.8454	36.2084
D2D5	14	0.12	0.2	0.32	3.125	20.6225	64.4453		D2D8	12	0.12	0.34	0.46	2.17391	13.9698	30.3691		D3D8	12	0.13	0.28	0.41	2.43902	16.4801	40.1955
D2D5	14	0.07	0.25	0.32	3.125	14.1763	44.3008		D2D8	14	0.16	0.19	0.35	2.85714	17.0018	48.5765		D3D8	12	0.1	0.36	0.46	2.17391	12.2139	26.5519
D2D5	14	0.09	0.23	0.32	3.125	14.1383	44.182		D2D8	14	0.1	0.24	0.34	2.94118	15.8603	46.648		D3D8	14	0.1	0.4	0.5	2	13.9573	27.9146
D2D5	14	0.09	0.3	0.39	2.5641	9.35308	23.9822		D2D8	14	0.13	0.23	0.36	2.77778	16.4319	45.6442		D3D8	14	0.13	0.34	0.47	2.12766	12.8734	27.3902
D2D5	14	0.07	0.2	0.27	3.7037	10.181	37.7073		D2D8	14	0.17	0.22	0.39	2.5641	15.6214	40.0549		D3D8	14	0.13	0.3	0.43	2.32558	13.4085	31.1825
D2D5	14	0.1	0.25	0.35	2.85714	15.8093	45.1693		D2D8	14	0.12	0.23	0.35	2.85714	15.3984	43.9954		D3D8	14	0.11	0.28	0.39	2.5641	14.5637	37.3429
D2D5	14	0.11	0.23	0.34	2.94118	16.8721	49.6238		D2D8	14	0.13	0.27	0.4	2.5	17.4821	43.7052		D3D8	14	0.13	0.31	0.44	2.27273	12.5732	28.5755
D2D5	14	0.11	0.23	0.34	2.94118	13.525	39.7793		D2D8	14	0.13	0.24	0.37	2.7027	18.2023	49.1954		D3D8	14	0.12	0.29	0.41	2.43902	15.6996	38.2917
D2D5	14	0.11	0.22	0.33	3.0303	11.1025	33.644		D2D8	14	0.15	0.26	0.41	2.43902	13.1018	31.9556		D3D8	14	0.13	0.32	0.45	2.22222	13.1889	29.3086
D2D5	14	0.12	0.42	0.54	1.85185	12.5118	23.1699		D2D8	14	0.09	0.27	0.36	2.77778	11.9746	33.2629		D3D8	14	0.12	0.22	0.34	2.94118	16.486	48.4883
D2D5	14	0.11	0.37	0.48	2.08333	13.0357	27.1578		D2D8	14	0.12	0.18	0.3	3.33333	16.8379	56.1263		D3D8	14	0.13	0.24	0.37	2.7027	17.6766	47.7745
D2D5	14	0.09	0.33	0.42	2.38095	11.0831	26.3882		D2D8	15	0.14	0.2	0.34	2.94118	21.9219	64.4762		D3D8	14	0.12	0.32	0.44	2.27273	11.3531	25.8024
D2D5	14	0.11	0.28	0.39	2.5641	17.4583	44.7648		D2D8	15	0.19	0.22	0.41	2.43902	19.0123	46.3715		D3D8	14	0.09	0.31	0.4	2.5	13.058	32.645
D2D5	14	0.09	0.24	0.33	3.0303	14.714	44.5878		D2D8	15	0.13	0.21	0.34	2.94118	18.0556	53.1048		D3D8	14	0.11	0.28	0.39	2.5641	14.5011	37.1824
D2D5	15	0.1	0.25	0.35	2.85714	14.6914	41.9753		D2D8	15	0.15	0.24	0.39	2.5641	18.5976	47.6861		D3D8	15	0.13	0.26	0.39	2.5641	19.8537	50.9068
D2D5	15	0.14	0.24	0.38	2.63158	20.7431	54.587		D2D8	15	0.14	0.23	0.37	2.7027	21.2579	57.4538		D3D8	15	0.13	0.22	0.35	2.85714	20.7446	59.2702
D2D5	15	0.1	0.27	0.37	2.7027	13.4112	36.2464		D2D8	15	0.12	0.14	0.26	3.84615	15.0166	57.7562		D3D8	15	0.17	0.4	0.57	1.75439	17.7356	31.1151
D2D5	15	0.13	0.2	0.33	3.0303	21.0485	63.7832		D2D8	15	0.1	0.2	0.3	3.33333	13.1165	43.7217		D3D8	15	0.13	0.3	0.43	2.32558	17.9167	41.6667
D2D5	15	0.16	0.2	0.36	2.77778	21.4597	59.6104		D2D8	15	0.12	0.23	0.35	2.85714	19.9098	56.8852		D3D8	15	0.14	0.27	0.41	2.43902	18.4252	44.9395
D2D5	15	0.14	0.18	0.32	3.125	18.6088	58.1526		D2D8	15	0.14	0.22	0.36	2.77778	20.9469	58.1858		D3D8	15	0.14	0.28	0.42	2.38095	18.9061	45.0146
D2D5	15	0.16	0.19	0.35	2.85714	21.5812	61.6605		D2D8	15	0.14	0.18	0.32	3.125	22.2079	69.3997		D3D8	15	0.12	0.16	0.28	3.57143	18.1444	64.8013
D2D5	15	0.13	0.23	0.36	2.77778	18.5931	51.6474		D2D8	15	0.14	0.19	0.33	3.0303	20.8954	63.3194		D3D8	15	0.12	0.23	0.35	2.85714	20.014	57.1828
D2D5	15	0.16	0.23	0.39	2.5641	21.7441	55.7542		D2D8	15	0.14	0.2	0.34	2.94118	22.1437	65.1286		D3D8	15	0.14	0.22	0.36	2.77778	22.2494	61.8038
D2D5	15	0.13	0.21	0.34	2.94118	20.6069	60.6086											D3D8	15	0.15	0.24	0.39	2.5641	21.788	55.8666
D2D5	15	0.16	0.23	0.39	2.5641	20.1125	51.5705											D3D8	15	0.15	0.21	0.36	2.77778	21.7531	60.4254
D2D5	15	0.11	0.15	0.26	3.84615	19.265	74.096
D2D5	15	0.12	0.17	0.29	3.44828	20.9783	72.339

## Sheet: Avg Swing Time
Animal ID	Control Swing Time	Dox Swing Time
1	0.0782143	0.100175
3	0.0896154	0.107593
4	0.0914286	0.109811
6	0.0776667	0.0987273
7	0.0766667	0.106364
9	0.0717241	0.0908772
11	0.0689655	0.0886364
12	0.116897	0.114103
14	0.0966667	0.114038
15	0.11069	0.13125
Average	0.0878534	0.106157
St Deviation	0.0163207	0.0124802

## Sheet: Avg Stance Time
Animal ID	Control Stance Time	Dox Stance Time
1	0.139286	0.163684
3	0.190769	0.207963
4	0.208571	0.216415
6	0.164	0.185091
7	0.198	0.219273
9	0.18069	0.206667
11	0.162069	0.202045
12	0.265862	0.271538
14	0.240667	0.252692
15	0.207586	0.21
Average	0.19575	0.213537
St Deviation	0.0377493	0.0306518

## Sheet: Avg Duty Cycle
Animal ID	Control Duty Cycle	Dox Duty Cycle
1	0.616215	0.616855
3	0.679106	0.655356
4	0.692315	0.657954
6	0.664254	0.650654
7	0.711574	0.668599
9	0.688418	0.691464
11	0.689477	0.693156
12	0.686783	0.694967
14	0.7112	0.684778
15	0.654341	0.612097
Average	0.679368	0.662588
St Deviation	0.0284808	0.0301887

## Sheet: Avg Speed
Animal ID	Control Speed	Dox Speed
1	62.4483	60.6506
3	62.5235	56.0935
4	61.2388	57.0557
6	60.504	60.3112
7	51.3408	51.5456
9	51.9677	52.7431
11	63.0966	50.1674
12	37.5681	38.418
14	41.8992	42.1159
15	59.1552	57.9689
Average	55.1742	52.707
St Deviation	9.20086	7.47693
