# Supplementary material for: Silencing long ascending propriospinal neurons after spinal cord injury improves hindlimb stepping in the adult rat
Source: eLife. 2021 Dec 2;10:e70058. doi: 10.7554/eLife.70058 (PMC8639151; doi:10.7554/eLife.70058)
Supplement: Figure 8—source data 1. [file elife-70058-fig8-data1.xlsx]

## Sheet: Uninjured Swim Phase
Time point	Animal ID	Pass Direction	Hindlimb Swim Phase		Time point	Animal ID	Pass Direction	Hindlimb Swim Phase		Time point	Animal ID	Pass Direction	Hindlimb Swim Phase		Time point	Animal ID	Pass Direction	Hindlimb Swim Phase		Time point	Animal ID	Pass Direction	Hindlimb Swim Phase
BL	17	L	0.615385		PD1	17	L	0.541667		D1D5	17	L	0.541667		D2D8	17	L	0.5		PostD1	17	L	0.521739
BL	17	L	0.583333		PD1	17	L	0.541667		D1D5	17	L	0.52		D2D8	17	L	0.52		PostD1	17	L	0.541667
BL	17	L	0.576923		PD1	17	L	0.5		D1D5	17	L	0.52		D2D8	17	L	0.52		PostD1	17	L	0.521739
BL	17	L	0.518519		PD1	17	L	0.52		D1D5	17	L	0.5		D2D8	17	L	0.518519		PostD1	17	L	0.541667
BL	17	L	0.56		PD1	17	L	0.521739		D1D5	17	L	0.571429		D2D8	17	L	0.64		PostD1	17	L	0.5
BL	17	L	0.652174		PD1	17	L	0.521739		D1D5	17	L	0.5		D2D8	17	L	0.521739		PostD1	17	L	0.5
BL	17	L	0.6		PD1	17	L	0.541667		D1D5	17	L	0.545455		D2D8	17	L	0.521739		PostD1	17	L	0.521739
BL	17	L	0.52		PD1	17	L	0.5		D1D5	17	L	0.521739		D2D8	17	L	0.52		PostD1	17	L	0.5
BL	17	L	0.541667		PD1	17	L	0.5		D1D5	17	L	0.521739		D2D8	17	L	0.521739		PostD1	17	L	0.518519
BL	17	L	0.521739		PD1	17	L	0.5		D1D5	17	L	0.633333		D2D8	17	L	0.551724		PostD1	17	L	0.5
BL	17	L	0.576923		PD1	17	L	0.5		D1D5	17	L	0.521739		D2D8	17	L	0.541667		PostD1	17	L	0.5
BL	17	L	0.555556		PD1	17	L	0.56		D1D5	17	L	0.521739		D2D8	17	L	0.52		PostD1	17	L	0.56
BL	17	L	0.592593		PD1	17	L	0.518519		D1D5	17	L	0.5		D2D8	17	L	0.5		PostD1	17	L	0.538462
BL	17	L	0.62963		PD1	17	L	0.541667		D1D5	17	L	0.5		D2D8	17	L	0.538462		PostD1	17	L	0.5
BL	17	L	0.538462		PD1	17	L	0.5		D1D5	17	L	0.5		D2D8	17	L	0.571429		PostD1	17	L	0.5
BL	17	L	0.555556		PD1	17	L	0.52		D1D5	17	L	0.545455		D2D8	17	L	0.541667		PostD1	17	L	0.52
BL	17	L	0.535714		PD1	17	L	0.576923		D1D5	17	L	0.521739		D2D8	17	L	0.52		PostD1	17	L	0.541667
BL	17	L	0.555556		PD1	17	L	0.52		D1D5	17	L	0.521739		D2D8	17	L	0.521739		PostD1	17	L	0.518519
BL	17	L	0.538462		PD1	18	L	0.52381		D1D5	18	L	0.521739		D2D8	17	L	0.541667		PostD1	18	L	0.592593
BL	18	L	0.619048		PD1	18	L	0.55		D1D5	18	L	0.565217		D2D8	18	L	0.541667		PostD1	18	L	0.571429
BL	18	L	0.6		PD1	18	L	0.545455		D1D5	18	L	0.521739		D2D8	18	L	0.5		PostD1	18	L	0.615385
BL	18	L	0.538462		PD1	18	L	0.590909		D1D5	18	L	0.545455		D2D8	18	L	0.521739		PostD1	18	L	0.56
BL	18	L	0.571429		PD1	18	L	0.521739		D1D5	18	L	0.586207		D2D8	18	L	0.5		PostD1	18	L	0.607143
BL	18	L	0.576923		PD1	18	L	0.590909		D1D5	18	L	0.5		D2D8	18	L	0.52381		PostD1	18	L	0.592593
BL	18	L	0.64		PD1	18	L	0.521739		D1D5	18	L	0.52381		D2D8	18	L	0.5		PostD1	18	L	0.533333
BL	18	L	0.615385		PD1	18	L	0.541667		D1D5	18	L	0.5		D2D8	18	L	0.56		PostD1	18	L	0.571429
BL	18	L	0.62069		PD1	18	L	0.5		D1D5	18	L	0.545455		D2D8	18	L	0.52381		PostD1	18	L	0.607143
BL	18	L	0.535714		PD1	18	L	0.521739		D1D5	18	L	0.590909		D2D8	18	L	0.52		PostD1	18	L	0.541667
BL	18	L	0.52		PD1	18	L	0.52		D1D5	18	L	0.541667		D2D8	18	L	0.583333		PostD1	18	L	0.5
BL	18	L	0.52		PD1	18	L	0.5		D1D5	18	L	0.5		D2D8	18	L	0.6		PostD1	18	L	0.68
BL	18	L	0.535714		PD1	18	L	0.5		D1D5	18	L	0.5		D2D8	18	L	0.52		PostD1	18	L	0.642857
BL	19	L	0.5		PD1	18	L	0.565217		D1D5	18	L	0.521739		D2D8	18	L	0.56		PostD1	18	L	0.583333
BL	19	L	0.5		PD1	18	L	0.521739		D1D5	18	L	0.5		D2D8	18	L	0.565217		PostD1	18	L	0.555556
BL	19	L	0.5		PD1	18	L	0.541667		D1D5	18	L	0.565217		D2D8	18	L	0.565217		PostD1	18	L	0.518519
BL	19	L	0.566667		PD1	18	L	0.625		D1D5	18	L	0.52		D2D8	18	L	0.5		PostD1	18	L	0.56
BL	19	L	0.535714		PD1	18	L	0.5		D1D5	18	L	0.538462		D2D8	19	L	0.5		PostD1	18	L	0.633333
BL	19	L	0.517241		PD1	18	L	0.52		D1D5	18	L	0.571429		D2D8	19	L	0.592593		PostD1	18	L	0.535714
BL	19	L	0.535714		PD1	19	L	0.555556		D1D5	18	L	0.5		D2D8	19	L	0.521739		PostD1	18	L	0.580645
BL	19	L	0.518519		PD1	19	L	0.518519		D1D5	19	L	0.533333		D2D8	19	L	0.555556		PostD1	18	L	0.733333
BL	19	L	0.517241		PD1	19	L	0.518519		D1D5	19	L	0.5		D2D8	19	L	0.62069		PostD1	18	L	0.875
BL	19	L	0.517241		PD1	19	L	0.571429		D1D5	19	L	0.516129		D2D8	19	L	0.576923		PostD1	19	L	0.52
BL	19	L	0.5		PD1	19	L	0.535714		D1D5	19	L	0.53125		D2D8	19	L	0.52		PostD1	19	L	0.535714
BL	19	L	0.551724		PD1	19	L	0.518519		D1D5	19	L	0.551724		D2D8	19	L	0.5		PostD1	19	L	0.555556
BL	19	L	0.5		PD1	19	L	0.538462		D1D5	19	L	0.592593		D2D8	19	L	0.535714		PostD1	19	L	0.535714
BL	19	L	0.62963		PD1	19	L	0.533333		D1D5	19	L	0.6		D2D8	19	L	0.518519		PostD1	19	L	0.518519
BL	19	L	0.571429		PD1	19	L	0.555556		D1D5	19	L	0.571429		D2D8	19	L	0.518519		PostD1	19	L	0.518519
BL	19	L	0.5		PD1	19	L	0.518519		D1D5	19	L	0.548387		D2D8	19	L	0.5		PostD1	19	L	0.535714
BL	20	L	0.576923		PD1	19	L	0.52		D1D5	19	L	0.5		D2D8	19	L	0.52		PostD1	19	L	0.517241
BL	20	L	0.541667		PD1	19	L	0.555556		D1D5	19	L	0.533333		D2D8	20	L	0.565217		PostD1	19	L	0.535714
BL	20	L	0.571429		PD1	19	L	0.535714		D1D5	19	L	0.535714		D2D8	20	L	0.590909		PostD1	19	L	0.517241
BL	20	L	0.521739		PD1	19	L	0.518519		D1D5	19	L	0.55		D2D8	20	L	0.521739		PostD1	19	L	0.533333
BL	20	L	0.583333		PD1	19	L	0.518519		D1D5	19	L	0.52		D2D8	20	L	0.541667		PostD1	19	L	0.533333
BL	20	L	0.576923		PD1	19	L	0.535714		D1D5	19	L	0.576923		D2D8	20	L	0.545455		PostD1	19	L	0.551724
BL	20	L	0.62963		PD1	20	L	0.541667		D1D5	19	L	0.655172		D2D8	20	L	0.5		PostD1	19	L	0.517241
BL	20	L	0.565217		PD1	20	L	0.5		D1D5	20	L	0.68		D2D8	20	L	0.521739		PostD1	19	L	0.5
BL	20	L	0.541667		PD1	20	L	0.535714		D1D5	20	L	0.6		D2D8	20	L	0.521739		PostD1	19	L	0.5
BL	20	L	0.518519		PD1	20	L	0.555556		D1D5	20	L	0.576923		D2D8	20	L	0.541667		PostD1	20	L	0.555556
BL	20	L	0.551724		PD1	20	L	0.566667		D1D5	20	L	0.576923		D2D8	20	L	0.5		PostD1	20	L	0.580645
BL	20	L	0.625		PD1	20	L	0.52		D1D5	20	L	0.538462		D2D8	20	L	0.521739		PostD1	20	L	0.518519
BL	20	L	0.615385		PD1	20	L	0.52		D1D5	20	L	0.592593		D2D8	20	L	0.541667		PostD1	20	L	0.571429
BL	20	L	0.5		PD1	20	L	0.56		D1D5	20	L	0.518519		D2D8	20	L	0.5		PostD1	20	L	0.555556
BL	20	L	0.535714		PD1	20	L	0.5		D1D5	20	L	0.518519		D2D8	20	L	0.52381		PostD1	20	L	0.652174
BL	20	L	0.551724		PD1	20	L	0.566667		D1D5	20	L	0.538462		D2D8	20	L	0.52381		PostD1	20	L	0.538462
BL	20	L	0.653846		PD1	20	L	0.551724		D1D5	20	L	0.555556		D2D8	20	L	0.52381		PostD1	20	L	0.517241
BL	20	L	0.535714		PD1	20	L	0.586207		D1D5	20	L	0.6		D2D8	20	L	0.6		PostD1	20	L	0.538462
BL	21	L	0.566667		PD1	20	L	0.5		D1D5	20	L	0.52		D2D8	20	L	0.545455		PostD1	20	L	0.538462
BL	21	L	0.571429		PD1	20	L	0.538462		D1D5	20	L	0.52		D2D8	21	L	0.5		PostD1	20	L	0.571429
BL	21	L	0.551724		PD1	20	L	0.518519		D1D5	20	L	0.5		D2D8	21	L	0.5		PostD1	20	L	0.636364
BL	21	L	0.517241		PD1	20	L	0.52		D1D5	20	L	0.518519		D2D8	21	L	0.538462		PostD1	20	L	0.655172
BL	21	L	0.517241		PD1	20	L	0.538462		D1D5	20	L	0.517241		D2D8	21	L	0.541667		PostD1	20	L	0.571429
BL	21	L	0.535714		PD1	20	L	0.518519		D1D5	20	L	0.518519		D2D8	21	L	0.52		PostD1	20	L	0.592593
BL	21	L	0.5625		PD1	20	L	0.551724		D1D5	20	L	0.576923		D2D8	21	L	0.5		PostD1	20	L	0.551724
BL	21	L	0.548387		PD1	21	L	0.5		D1D5	20	L	0.56		D2D8	21	L	0.551724		PostD1	20	L	0.542857
BL	21	L	0.516129		PD1	21	L	0.52		D1D5	20	L	0.541667		D2D8	21	L	0.538462		PostD1	21	L	0.535714
BL	21	L	0.5		PD1	21	L	0.538462		D1D5	21	L	0.538462		D2D8	21	L	0.676471		PostD1	21	L	0.5
BL	21	L	0.5		PD1	21	L	0.518519		D1D5	21	L	0.5		D2D8	21	L	0.52		PostD1	21	L	0.52
BL	21	L	0.551724		PD1	21	L	0.52		D1D5	21	L	0.56		D2D8	21	L	0.538462		PostD1	21	L	0.5
BL	21	L	0.586207		PD1	21	L	0.5		D1D5	21	L	0.52		D2D8	21	L	0.583333		PostD1	21	L	0.5
BL	21	L	0.566667		PD1	21	L	0.5		D1D5	21	L	0.592593		D2D8	21	L	0.52		PostD1	21	L	0.5
BL	21	L	0.533333		PD1	21	L	0.5		D1D5	21	L	0.608696		D2D8	21	L	0.5		PostD1	21	L	0.52
BL	21	L	0.53125		PD1	21	L	0.5		D1D5	21	L	0.555556		D2D8	21	L	0.541667		PostD1	21	L	0.52
BL	21	L	0.6		PD1	21	L	0.5		D1D5	21	L	0.5		D2D8	21	L	0.541667		PostD1	21	L	0.52
BL	21	L	0.548387		PD1	21	L	0.5		D1D5	21	L	0.555556		D2D8	21	L	0.5		PostD1	21	L	0.5
BL	21	L	0.566667		PD1	21	L	0.5		D1D5	21	L	0.538462		D2D8	21	L	0.538462		PostD1	21	L	0.5
BL	21	L	0.566667		PD1	21	L	0.535714		D1D5	21	L	0.538462		D2D8	21	L	0.5		PostD1	21	L	0.52
BL	22	L	0.541667		PD1	21	L	0.571429		D1D5	21	L	0.555556		D2D8	22	L	0.565217		PostD1	21	L	0.538462
BL	22	L	0.521739		PD1	21	L	0.548387		D1D5	21	L	0.518519		D2D8	22	L	0.607143		PostD1	21	L	0.551724
BL	22	L	0.52		PD1	21	L	0.517241		D1D5	21	L	0.535714		D2D8	22	L	0.583333		PostD1	21	L	0.535714
BL	22	L	0.52		PD1	21	L	0.555556		D1D5	21	L	0.571429		D2D8	22	L	0.555556		PostD1	21	L	0.538462
BL	22	L	0.541667		PD1	22	L	0.545455		D1D5	21	L	0.5		D2D8	22	L	0.608696		PostD1	21	L	0.518519
BL	22	L	0.6		PD1	22	L	0.565217		D1D5	21	L	0.535714		D2D8	22	L	0.52381		PostD1	21	L	0.52
BL	22	L	0.576923		PD1	22	L	0.5		D1D5	21	L	0.518519		D2D8	22	L	0.68		PostD1	21	L	0.535714
BL	22	L	0.538462		PD1	22	L	0.545455		D1D5	21	L	0.518519		D2D8	22	L	0.642857		PostD1	22	L	0.565217
BL	22	L	0.5		PD1	22	L	0.541667		D1D5	21	L	0.535714		D2D8	22	L	0.583333		PostD1	22	L	0.565217
BL	22	L	0.615385		PD1	22	L	0.5		D1D5	22	L	0.571429		D2D8	22	L	0.636364		PostD1	22	L	0.56
BL	22	L	0.571429		PD1	22	L	0.565217		D1D5	22	L	0.565217		D2D8	22	L	0.606061		PostD1	22	L	0.565217
BL	22	L	0.56		PD1	22	L	0.5		D1D5	22	L	0.56		D2D8	22	L	0.545455		PostD1	22	L	0.5
BL	22	L	0.538462		PD1	22	L	0.545455		D1D5	22	L	0.6		D2D8	22	L	0.608696		PostD1	22	L	0.538462
BL	22	L	0.576923		PD1	22	L	0.521739		D1D5	22	L	0.62963		D2D8	22	L	0.590909		PostD1	22	L	0.545455
BL	22	L	0.56		PD1	22	L	0.541667		D1D5	22	L	0.590909		D2D8	22	L	0.583333		PostD1	22	L	0.545455
BL	22	L	0.576923		PD1	22	L	0.521739		D1D5	22	L	0.545455		D2D8	22	L	0.616364		PostD1	22	L	0.5
BL	22	L	0.538462		PD1	22	L	0.541667		D1D5	22	L	0.521739		D2D8	22	L	0.545455		PostD1	22	L	0.541667
BL	22	L	0.555556		PD1	22	L	0.521739		D1D5	22	L	0.545455		D2D8	22	L	0.571429		PostD1	22	L	0.5
BL	22	L	0.538462		PD1	22	L	0.565217		D1D5	22	L	0.555556		D2D8	22	L	0.571429		PostD1	22	L	0.5
BL	23	L	0.541667		PD1	22	L	0.521739		D1D5	22	L	0.52381		D2D8	22	L	0.521739		PostD1	22	L	0.5
BL	23	L	0.535714		PD1	22	L	0.521739		D1D5	22	L	0.52381		D2D8	22	L	0.565217		PostD1	22	L	0.521739
BL	23	L	0.533333		PD1	22	L	0.5		D1D5	22	L	0.521739		D2D8	22	L	0.5		PostD1	22	L	0.56
BL	23	L	0.538462		PD1	22	L	0.521739		D1D5	22	L	0.521739		D2D8	23	L	0.571429		PostD1	22	L	0.565217
BL	23	L	0.538462		PD1	22	L	0.5		D1D5	22	L	0.606061		D2D8	23	L	0.518519		PostD1	22	L	0.5
BL	23	L	0.517241		PD1	22	L	0.580645		D1D5	22	L	0.590909		D2D8	23	L	0.538462		PostD1	22	L	0.521739
BL	23	L	0.538462		PD1	23	L	0.5		D1D5	22	L	0.5		D2D8	23	L	0.62069		PostD1	22	L	0.5
BL	23	L	0.555556		PD1	23	L	0.535714		D1D5	22	L	0.521739		D2D8	23	L	0.518519		PostD1	23	L	0.571429
BL	23	L	0.517241		PD1	23	L	0.517241		D1D5	22	L	0.521739		D2D8	23	L	0.535714		PostD1	23	L	0.535714
BL	23	L	0.5		PD1	23	L	0.551724		D1D5	22	L	0.521739		D2D8	23	L	0.535714		PostD1	23	L	0.517241
BL	23	L	0.518519		PD1	23	L	0.5625		D1D5	23	L	0.541667		D2D8	23	L	0.628571		PostD1	23	L	0.517241
BL	23	L	0.586207		PD1	23	L	0.5		D1D5	23	L	0.678571		D2D8	23	L	0.59375		PostD1	23	L	0.5625
BL	23	L	0.571429		PD1	23	L	0.5		D1D5	23	L	0.535714		D2D8	23	L	0.571429		PostD1	23	L	0.533333
BL	23	L	0.592593		PD1	23	L	0.538462		D1D5	23	L	0.535714		D2D8	23	L	0.518519		PostD1	23	L	0.571429
BL	23	L	0.5		PD1	23	L	0.5		D1D5	23	L	0.566667		D2D8	23	L	0.517241		PostD1	23	L	0.5
BL	23	L	0.517241		PD1	23	L	0.521739		D1D5	23	L	0.52		D2D8	23	L	0.516129		PostD1	23	L	0.517241
BL	24	L	0.571429		PD1	23	L	0.52		D1D5	23	L	0.518519		D2D8	23	L	0.551724		PostD1	23	L	0.535714
BL	24	L	0.655172		PD1	23	L	0.5		D1D5	23	L	0.5		D2D8	23	L	0.518519		PostD1	23	L	0.551724
BL	24	L	0.571429		PD1	23	L	0.517241		D1D5	23	L	0.518519		D2D8	23	L	0.5		PostD1	23	L	0.551724
BL	24	L	0.555556		PD1	23	L	0.555556		D1D5	23	L	0.535714		D2D8	24	L	0.551724		PostD1	23	L	0.580645
BL	24	L	0.517241		PD1	23	L	0.518519		D1D5	23	L	0.518519		D2D8	24	L	0.533333		PostD1	23	L	0.551724
BL	24	L	0.59375		PD1	23	L	0.551724		D1D5	23	L	0.5		D2D8	24	L	0.533333		PostD1	23	L	0.533333
BL	24	L	0.517241		PD1	23	L	0.518519		D1D5	23	L	0.518519		D2D8	24	L	0.53125		PostD1	23	L	0.53125
BL	24	L	0.586207		PD1	24	L	0.571429		D1D5	23	L	0.545455		D2D8	24	L	0.566667		PostD1	23	L	0.5
BL	24	L	0.548387		PD1	24	L	0.571429		D1D5	23	L	0.5		D2D8	24	L	0.527778		PostD1	23	L	0.517241
BL	24	L	0.566667		PD1	24	L	0.607143		D1D5	23	L	0.5		D2D8	24	L	0.5		PostD1	23	L	0.517241
BL	24	L	0.540541		PD1	24	L	0.576923		D1D5	23	L	0.535714		D2D8	24	L	0.538462		PostD1	23	L	0.533333
BL	24	L	0.606061		PD1	24	L	0.6		D1D5	23	L	0.535714		D2D8	24	L	0.516129		PostD1	23	L	0.533333
BL	24	L	0.516129		PD1	24	L	0.585385		D1D5	23	L	0.517241		D2D8	24	L	0.533333		PostD1	23	L	0.535714
BL	24	L	0.6		PD1	24	L	0.586207		D1D5	24	L	0.517241		D2D8	24	L	0.535714		PostD1	23	L	0.517241
BL	24	L	0.555556		PD1	24	L	0.551724		D1D5	24	L	0.5		D2D8	24	L	0.538462		PostD1	24	L	0.518519
BL	24	L	0.666667		PD1	24	L	0.535714		D1D5	24	L	0.571429		D2D8	24	L	0.533333		PostD1	24	L	0.538462
BL	24	L	0.75		PD1	24	L	0.558824		D1D5	24	L	0.625		D2D8	24	L	0.551724		PostD1	24	L	0.535714
BL	17	R	0.52381		PD1	24	L	0.528705		D1D5	24	L	0.548387		D2D8	24	L	0.571429		PostD1	24	L	0.535714
BL	17	R	0.583333		PD1	24	L	0.571429		D1D5	24	L	0.516129		D2D8	24	L	0.576923		PostD1	24	L	0.518519
BL	17	R	0.583333		PD1	24	L	0.555556		D1D5	24	L	0.535714		D2D8	17	R	0.52381		PostD1	24	L	0.518519
BL	17	R	0.681818		PD1	24	L	0.517241		D1D5	24	L	0.513514		D2D8	17	R	0.571429		PostD1	24	L	0.517241
BL	17	R	0.730769		PD1	24	L	0.535714		D1D5	24	L	0.520371		D2D8	17	R	0.55		PostD1	24	L	0.5
BL	17	R	0.521739		PD1	24	L	0.544985		D1D5	24	L	0.571429		D2D8	17	R	0.545455		PostD1	24	L	0.5
BL	17	R	0.5		PD1	24	L	0.555556		D1D5	24	L	0.533333		D2D8	17	R	0.52381		PostD1	24	L	0.5
BL	17	R	0.521739		PD1	24	L	0.535714		D1D5	24	L	0.551724		D2D8	17	R	0.52381		PostD1	24	L	0.566667
BL	17	R	0.56		PD1	24	L	0.5		D1D5	24	L	0.5		D2D8	17	R	0.565217		PostD1	24	L	0.580645
BL	17	R	0.517241		PD1	24	L	0.545455		D1D5	24	L	0.539122		D2D8	17	R	0.5		PostD1	24	L	0.566667
BL	17	R	0.545455		PD1	17	R	0.526316		D1D5	24	L	0.625		D2D8	17	R	0.52381		PostD1	24	L	0.571429
BL	17	R	0.565217		PD1	17	R	0.526316		D1D5	24	L	0.538462		D2D8	17	R	0.521739		PostD1	24	L	0.5
BL	17	R	0.545455		PD1	17	R	0.5		D1D5	24	L	0.518519		D2D8	17	R	0.521739		PostD1	24	L	0.551724
BL	17	R	0.52		PD1	17	R	0.5		D1D5	24	L	0.533333		D2D8	17	R	0.545455		PostD1	24	L	0.535714
BL	17	R	0.545455		PD1	17	R	0.52381		D1D5	17	R	0.590909		D2D8	17	R	0.545455		PostD1	24	L	0.59375
BL	17	R	0.565217		PD1	17	R	0.526316		D1D5	17	R	0.565217		D2D8	17	R	0.52		PostD1	24	L	0.592593
BL	17	R	0.565217		PD1	17	R	0.521739		D1D5	17	R	0.521739		D2D8	17	R	0.5		PostD1	24	L	0.538462
BL	17	R	0.521739		PD1	17	R	0.521739		D1D5	17	R	0.5		D2D8	17	R	0.5		PostD1	24	L	0.517241
BL	17	R	0.521739		PD1	17	R	0.607143		D1D5	17	R	0.607143		D2D8	17	R	0.545455		PostD1	17	R	0.521739
BL	18	R	0.708333		PD1	17	R	0.571429		D1D5	17	R	0.5		D2D8	17	R	0.541667		PostD1	17	R	0.521739
BL	18	R	0.518519		PD1	17	R	0.52381		D1D5	17	R	0.5		D2D8	17	R	0.541667		PostD1	17	R	0.545455
BL	18	R	0.52		PD1	17	R	0.5		D1D5	17	R	0.5		D2D8	18	R	0.521739		PostD1	17	R	0.5
BL	18	R	0.5		PD1	17	R	0.5		D1D5	17	R	0.5		D2D8	18	R	0.52		PostD1	17	R	0.521739
BL	18	R	0.517241		PD1	17	R	0.52381		D1D5	17	R	0.52381		D2D8	18	R	0.521739		PostD1	17	R	0.52
BL	18	R	0.586207		PD1	17	R	0.5		D1D5	17	R	0.545455		D2D8	18	R	0.52		PostD1	17	R	0.538462
BL	18	R	0.586207		PD1	17	R	0.5		D1D5	17	R	0.521739		D2D8	18	R	0.518519		PostD1	17	R	0.52
BL	18	R	0.5		PD1	17	R	0.565217		D1D5	17	R	0.521739		D2D8	18	R	0.555556		PostD1	17	R	0.521739
BL	18	R	0.555556		PD1	17	R	0.517241		D1D5	17	R	0.518519		D2D8	18	R	0.607143		PostD1	17	R	0.5
BL	18	R	0.566667		PD1	18	R	0.538462		D1D5	17	R	0.5		D2D8	18	R	0.517241		PostD1	17	R	0.52
BL	18	R	0.586207		PD1	18	R	0.615385		D1D5	17	R	0.55		D2D8	18	R	0.538462		PostD1	17	R	0.52
BL	18	R	0.566667		PD1	18	R	0.6		D1D5	17	R	0.565217		D2D8	18	R	0.5		PostD1	17	R	0.538462
BL	19	R	0.56		PD1	18	R	0.6		D1D5	17	R	0.5		D2D8	18	R	0.538462		PostD1	17	R	0.56
BL	19	R	0.518519		PD1	18	R	0.6		D1D5	18	R	0.571429		D2D8	18	R	0.541667		PostD1	17	R	0.565217
BL	19	R	0.612903		PD1	18	R	0.521739		D1D5	18	R	0.555556		D2D8	18	R	0.52		PostD1	17	R	0.565217
BL	19	R	0.517241		PD1	18	R	0.521739		D1D5	18	R	0.535714		D2D8	18	R	0.5		PostD1	17	R	0.52
BL	19	R	0.52		PD1	18	R	0.52		D1D5	18	R	0.566667		D2D8	18	R	0.52		PostD1	17	R	0.518519
BL	19	R	0.5		PD1	18	R	0.5		D1D5	18	R	0.535714		D2D8	18	R	0.52		PostD1	18	R	0.576923
BL	19	R	0.5		PD1	18	R	0.533333		D1D5	18	R	0.56		D2D8	19	R	0.5		PostD1	18	R	0.583333
BL	19	R	0.551724		PD1	18	R	0.521739		D1D5	18	R	0.52		D2D8	19	R	0.52		PostD1	18	R	0.541667
BL	19	R	0.53125		PD1	18	R	0.5		D1D5	18	R	0.538462		D2D8	19	R	0.518519		PostD1	18	R	0.52
BL	19	R	0.533333		PD1	18	R	0.5		D1D5	18	R	0.576923		D2D8	19	R	0.538462		PostD1	18	R	0.545455
BL	19	R	0.555556		PD1	18	R	0.5		D1D5	18	R	0.518519		D2D8	19	R	0.518519		PostD1	18	R	0.545455
BL	19	R	0.6		PD1	18	R	0.6		D1D5	18	R	0.615385		D2D8	19	R	0.565217		PostD1	18	R	0.52
BL	19	R	0.515152		PD1	18	R	0.583333		D1D5	18	R	0.6		D2D8	19	R	0.551724		PostD1	18	R	0.52
BL	19	R	0.59375		PD1	18	R	0.555556		D1D5	18	R	0.518519		D2D8	19	R	0.64		PostD1	18	R	0.56
BL	19	R	0.62963		PD1	18	R	0.518519		D1D5	18	R	0.538462		D2D8	19	R	0.56		PostD1	18	R	0.521739
BL	19	R	0.5625		PD1	18	R	0.555556		D1D5	18	R	0.5		D2D8	19	R	0.518519		PostD1	18	R	0.565217
BL	20	R	0.538462		PD1	19	R	0.5		D1D5	18	R	0.565217		D2D8	19	R	0.583333		PostD1	18	R	0.5
BL	20	R	0.551724		PD1	19	R	0.521739		D1D5	18	R	0.517241		D2D8	19	R	0.555556		PostD1	18	R	0.625
BL	20	R	0.666667		PD1	19	R	0.52		D1D5	18	R	0.517241		D2D8	19	R	0.571429		PostD1	18	R	0.52
BL	20	R	0.538462		PD1	19	R	0.538462		D1D5	18	R	0.566667		D2D8	20	R	0.5		PostD1	18	R	0.56
BL	20	R	0.5		PD1	19	R	0.56		D1D5	18	R	0.548387		D2D8	20	R	0.5		PostD1	18	R	0.5
BL	20	R	0.62069		PD1	19	R	0.583333		D1D5	19	R	0.576923		D2D8	20	R	0.56		PostD1	18	R	0.615385
BL	20	R	0.592593		PD1	19	R	0.576923		D1D5	19	R	0.551724		D2D8	20	R	0.551724		PostD1	18	R	0.538462
BL	20	R	0.535714		PD1	19	R	0.594595		D1D5	19	R	0.538462		D2D8	20	R	0.555556		PostD1	18	R	0.535714
BL	20	R	0.551724		PD1	19	R	0.52		D1D5	19	R	0.535714		D2D8	20	R	0.541667		PostD1	18	R	0.555556
BL	20	R	0.586207		PD1	19	R	0.56		D1D5	19	R	0.517241		D2D8	20	R	0.5		PostD1	18	R	0.52
BL	20	R	0.571429		PD1	19	R	0.566667		D1D5	19	R	0.5		D2D8	20	R	0.56		PostD1	18	R	0.612903
BL	20	R	0.566667		PD1	19	R	0.5		D1D5	19	R	0.518519		D2D8	20	R	0.541667		PostD1	19	R	0.548387
BL	20	R	0.666667		PD1	19	R	0.607143		D1D5	19	R	0.538462		D2D8	20	R	0.5		PostD1	19	R	0.516129
BL	20	R	0.65625		PD1	19	R	0.555556		D1D5	19	R	0.5		D2D8	20	R	0.521739		PostD1	19	R	0.527778
BL	20	R	0.571429		PD1	19	R	0.555556		D1D5	19	R	0.52		D2D8	20	R	0.541667		PostD1	19	R	0.5
BL	20	R	0.5		PD1	19	R	0.566667		D1D5	19	R	0.518519		D2D8	20	R	0.541667		PostD1	19	R	0.5
BL	20	R	0.535714		PD1	20	R	0.571429		D1D5	19	R	0.586207		D2D8	20	R	0.5		PostD1	19	R	0.535714
BL	20	R	0.555556		PD1	20	R	0.5		D1D5	19	R	0.555556		D2D8	20	R	0.52		PostD1	19	R	0.566667
BL	21	R	0.5		PD1	20	R	0.521739		D1D5	19	R	0.555556		D2D8	20	R	0.52		PostD1	19	R	0.580645
BL	21	R	0.518519		PD1	20	R	0.518519		D1D5	19	R	0.518519		D2D8	20	R	0.52		PostD1	19	R	0.538462
BL	21	R	0.5		PD1	20	R	0.56		D1D5	19	R	0.533333		D2D8	20	R	0.576923		PostD1	19	R	0.551724
BL	21	R	0.576923		PD1	20	R	0.68		D1D5	20	R	0.583333		D2D8	21	R	0.555556		PostD1	19	R	0.517241
BL	21	R	0.583333		PD1	20	R	0.5		D1D5	20	R	0.56		D2D8	21	R	0.518519		PostD1	19	R	0.558824
BL	21	R	0.565217		PD1	20	R	0.545455		D1D5	20	R	0.5		D2D8	21	R	0.538462		PostD1	19	R	0.517241
BL	21	R	0.541667		PD1	20	R	0.541667		D1D5	20	R	0.5		D2D8	21	R	0.541667		PostD1	19	R	0.5
BL	21	R	0.52		PD1	20	R	0.5		D1D5	20	R	0.538462		D2D8	21	R	0.521739		PostD1	19	R	0.53125
BL	21	R	0.541667		PD1	20	R	0.5		D1D5	20	R	0.541667		D2D8	21	R	0.5		PostD1	19	R	0.5
BL	21	R	0.538462		PD1	20	R	0.5		D1D5	20	R	0.5		D2D8	21	R	0.5		PostD1	20	R	0.518519
BL	21	R	0.62069		PD1	20	R	0.52		D1D5	20	R	0.521739		D2D8	21	R	0.571429		PostD1	20	R	0.5
BL	21	R	0.56		PD1	20	R	0.538462		D1D5	20	R	0.521739		D2D8	21	R	0.555556		PostD1	20	R	0.538462
BL	21	R	0.5		PD1	20	R	0.545455		D1D5	20	R	0.5		D2D8	21	R	0.521739		PostD1	20	R	0.576923
BL	21	R	0.52		PD1	20	R	0.565217		D1D5	20	R	0.8125		D2D8	21	R	0.545455		PostD1	20	R	0.5
BL	21	R	0.5		PD1	20	R	0.545455		D1D5	20	R	0.684211		D2D8	21	R	0.541667		PostD1	20	R	0.571429
BL	21	R	0.612903		PD1	20	R	0.521739		D1D5	20	R	0.565217		D2D8	21	R	0.5		PostD1	20	R	0.571429
BL	21	R	0.518519		PD1	20	R	0.52		D1D5	20	R	0.55		D2D8	21	R	0.5		PostD1	20	R	0.576923
BL	21	R	0.606061		PD1	21	R	0.56		D1D5	20	R	0.521739		D2D8	21	R	0.5		PostD1	20	R	0.541667
BL	21	R	0.565217		PD1	21	R	0.64		D1D5	20	R	0.521739		D2D8	21	R	0.521739		PostD1	20	R	0.52
BL	21	R	0.5625		PD1	21	R	0.52		D1D5	20	R	0.5		D2D8	21	R	0.576923		PostD1	20	R	0.555556
BL	22	R	0.565217		PD1	21	R	0.52		D1D5	20	R	0.521739		D2D8	21	R	0.5		PostD1	20	R	0.535714
BL	22	R	0.5		PD1	21	R	0.52		D1D5	20	R	0.5		D2D8	21	R	0.52		PostD1	20	R	0.538462
BL	22	R	0.521739		PD1	21	R	0.5		D1D5	20	R	0.52		D2D8	22	R	0.541667		PostD1	20	R	0.52
BL	22	R	0.571429		PD1	21	R	0.5		D1D5	21	R	0.52381		D2D8	22	R	0.565217		PostD1	20	R	0.52
BL	22	R	0.52381		PD1	21	R	0.52		D1D5	21	R	0.521739		D2D8	22	R	0.541667		PostD1	20	R	0.571429
BL	22	R	0.545455		PD1	21	R	0.52381		D1D5	21	R	0.52381		D2D8	22	R	0.541667		PostD1	20	R	0.571429
BL	22	R	0.56		PD1	21	R	0.521739		D1D5	21	R	0.545455		D2D8	22	R	0.583333		PostD1	21	R	0.52
BL	22	R	0.5		PD1	21	R	0.5		D1D5	21	R	0.545455		D2D8	22	R	0.538462		PostD1	21	R	0.535714
BL	22	R	0.52381		PD1	21	R	0.541667		D1D5	21	R	0.545455		D2D8	22	R	0.5		PostD1	21	R	0.5
BL	22	R	0.52381		PD1	21	R	0.571429		D1D5	21	R	0.541667		D2D8	22	R	0.52381		PostD1	21	R	0.56
BL	22	R	0.5		PD1	21	R	0.521739		D1D5	21	R	0.52		D2D8	22	R	0.521739		PostD1	21	R	0.5
BL	22	R	0.545455		PD1	21	R	0.541667		D1D5	21	R	0.5		D2D8	22	R	0.521739		PostD1	21	R	0.521739
BL	22	R	0.521739		PD1	21	R	0.565217		D1D5	21	R	0.538462		D2D8	22	R	0.52381		PostD1	21	R	0.52
BL	22	R	0.5		PD1	21	R	0.518519		D1D5	21	R	0.5		D2D8	22	R	0.521739		PostD1	21	R	0.586207
BL	22	R	0.565217		PD1	22	R	0.5		D1D5	21	R	0.521739		D2D8	22	R	0.5		PostD1	21	R	0.571429
BL	22	R	0.521739		PD1	22	R	0.5		D1D5	21	R	0.521739		D2D8	22	R	0.521739		PostD1	21	R	0.5
BL	22	R	0.55		PD1	22	R	0.545455		D1D5	21	R	0.52		D2D8	22	R	0.521739		PostD1	21	R	0.52
BL	22	R	0.545455		PD1	22	R	0.541667		D1D5	21	R	0.518519		D2D8	22	R	0.52381		PostD1	21	R	0.518519
BL	22	R	0.5		PD1	22	R	0.521739		D1D5	21	R	0.565217		D2D8	22	R	0.5		PostD1	21	R	0.52
BL	23	R	0.633333		PD1	22	R	0.5		D1D5	21	R	0.541667		D2D8	22	R	0.571429		PostD1	21	R	0.541667
BL	23	R	0.53125		PD1	22	R	0.52		D1D5	21	R	0.545455		D2D8	22	R	0.545455		PostD1	21	R	0.576923
BL	23	R	0.517241		PD1	22	R	0.56		D1D5	21	R	0.5		D2D8	22	R	0.5		PostD1	21	R	0.52
BL	23	R	0.516129		PD1	22	R	0.5		D1D5	21	R	0.535714		D2D8	22	R	0.521739		PostD1	21	R	0.538462
BL	23	R	0.5		PD1	22	R	0.5		D1D5	22	R	0.5		D2D8	22	R	0.5		PostD1	21	R	0.52
BL	23	R	0.535714		PD1	22	R	0.6		D1D5	22	R	0.5		D2D8	23	R	0.541667		PostD1	21	R	0.52
BL	23	R	0.516129		PD1	22	R	0.545455		D1D5	22	R	0.52		D2D8	23	R	0.652174		PostD1	22	R	0.545455
BL	23	R	0.5		PD1	22	R	0.5		D1D5	22	R	0.541667		D2D8	23	R	0.571429		PostD1	22	R	0.521739
BL	23	R	0.533333		PD1	22	R	0.521739		D1D5	22	R	0.571429		D2D8	23	R	0.518519		PostD1	22	R	0.52
BL	23	R	0.551724		PD1	22	R	0.521739		D1D5	22	R	0.521739		D2D8	23	R	0.5		PostD1	22	R	0.52
BL	23	R	0.551724		PD1	22	R	0.52		D1D5	22	R	0.541667		D2D8	23	R	0.5		PostD1	22	R	0.52
BL	23	R	0.533333		PD1	22	R	0.5		D1D5	22	R	0.521739		D2D8	23	R	0.583333		PostD1	22	R	0.5
BL	23	R	0.5		PD1	22	R	0.52381		D1D5	22	R	0.521739		D2D8	23	R	0.541667		PostD1	22	R	0.5
BL	23	R	0.551724		PD1	22	R	0.52381		D1D5	22	R	0.52		D2D8	23	R	0.535714		PostD1	22	R	0.541667
BL	23	R	0.53125		PD1	22	R	0.521739		D1D5	22	R	0.5		D2D8	23	R	0.566667		PostD1	22	R	0.52
BL	23	R	0.533333		PD1	22	R	0.56		D1D5	22	R	0.521739		D2D8	23	R	0.607143		PostD1	22	R	0.5
BL	24	R	0.555556		PD1	23	R	0.590909		D1D5	22	R	0.521739		D2D8	23	R	0.545455		PostD1	22	R	0.5
BL	24	R	0.6		PD1	23	R	0.521739		D1D5	22	R	0.521739		D2D8	23	R	0.52		PostD1	22	R	0.5
BL	24	R	0.592593		PD1	23	R	0.52		D1D5	22	R	0.52		D2D8	23	R	0.538462		PostD1	22	R	0.56
BL	24	R	0.642857		PD1	23	R	0.52		D1D5	22	R	0.52		D2D8	23	R	0.5		PostD1	22	R	0.52
BL	24	R	0.5		PD1	23	R	0.5625		D1D5	22	R	0.52		D2D8	23	R	0.52		PostD1	22	R	0.565217
BL	24	R	0.555556		PD1	23	R	0.541667		D1D5	22	R	0.521739		D2D8	24	R	0.575758		PostD1	22	R	0.541667
BL	24	R	0.538462		PD1	23	R	0.565217		D1D5	22	R	0.52		D2D8	24	R	0.6		PostD1	22	R	0.52
BL	24	R	0.571429		PD1	23	R	0.56		D1D5	22	R	0.538462		D2D8	24	R	0.5625		PostD1	22	R	0.5
BL	24	R	0.5		PD1	23	R	0.612903		D1D5	23	R	0.521739		D2D8	24	R	0.5		PostD1	22	R	0.52
BL	24	R	0.555556		PD1	23	R	0.583333		D1D5	23	R	0.6		D2D8	24	R	0.56		PostD1	23	R	0.571429
BL	24	R	0.5		PD1	23	R	0.52381		D1D5	23	R	0.576923		D2D8	24	R	0.551724		PostD1	23	R	0.535714
BL	24	R	0.606061		PD1	23	R	0.5		D1D5	23	R	0.7		D2D8	24	R	0.5		PostD1	23	R	0.517241
BL	24	R	0.606061		PD1	23	R	0.5		D1D5	23	R	0.5		D2D8	24	R	0.517241		PostD1	23	R	0.517241
BL	24	R	0.5		PD1	23	R	0.576923		D1D5	23	R	0.52		D2D8	24	R	0.535714		PostD1	23	R	0.5625
BL	24	R	0.5		PD1	23	R	0.56		D1D5	23	R	0.5		D2D8	24	R	0.518519		PostD1	23	R	0.533333
BL	24	R	0.551724		PD1	23	R	0.56		D1D5	23	R	0.52		D2D8	24	R	0.517241		PostD1	23	R	0.571429
BL	24	R	0.535714		PD1	23	R	0.535714		D1D5	23	R	0.5		D2D8	24	R	0.5		PostD1	23	R	0.5
					PD1	24	R	0.517241		D1D5	23	R	0.545455		D2D8	24	R	0.518519		PostD1	23	R	0.517241
					PD1	24	R	0.533333		D1D5	23	R	0.52381		D2D8	24	R	0.517241		PostD1	23	R	0.535714
					PD1	24	R	0.548387		D1D5	23	R	0.521739		D2D8	24	R	0.518519		PostD1	23	R	0.551724
					PD1	24	R	0.657143		D1D5	23	R	0.541667		D2D8	24	R	0.5		PostD1	23	R	0.551724
					PD1	24	R	0.52		D1D5	23	R	0.52							PostD1	23	R	0.580645
					PD1	24	R	0.633333		D1D5	23	R	0.52							PostD1	23	R	0.551724
					PD1	24	R	0.518519		D1D5	23	R	0.521739							PostD1	23	R	0.533333
					PD1	24	R	0.517241		D1D5	23	R	0.521739							PostD1	23	R	0.53125
					PD1	24	R	0.533333		D1D5	23	R	0.518519							PostD1	23	R	0.5
					PD1	24	R	0.533333		D1D5	23	R	0.548387							PostD1	23	R	0.517241
					PD1	24	R	0.555556		D1D5	24	R	0.517241							PostD1	23	R	0.517241
					PD1	24	R	0.538462		D1D5	24	R	0.551724							PostD1	23	R	0.533333
					PD1	24	R	0.518519		D1D5	24	R	0.548387							PostD1	23	R	0.533333
					PD1	24	R	0.518519		D1D5	24	R	0.575758							PostD1	23	R	0.535714
					PD1	24	R	0.535714		D1D5	24	R	0.548387							PostD1	23	R	0.517241
					PD1	24	R	0.518519		D1D5	24	R	0.515152							PostD1	24	R	0.6
					PD1	24	R	0.535714		D1D5	24	R	0.551724							PostD1	24	R	0.512821
					PD1	24	R	0.518519		D1D5	24	R	0.555556							PostD1	24	R	0.555556
					PD1	24	R	0.518519		D1D5	24	R	0.517241							PostD1	24	R	0.580645
					PD1	24	R	0.551724		D1D5	24	R	0.518519							PostD1	24	R	0.533333
										D1D5	24	R	0.5							PostD1	24	R	0.645161
										D1D5	24	R	0.517241							PostD1	24	R	0.69697
										D1D5	24	R	0.5							PostD1	24	R	0.612903
										D1D5	24	R	0.535714							PostD1	24	R	0.612903
										D1D5	24	R	0.5							PostD1	24	R	0.65625
										D1D5	24	R	0.535714							PostD1	24	R	0.586207
										D1D5	24	R	0.5							PostD1	24	R	0.548387
										D1D5	24	R	0.516129							PostD1	24	R	0.586207
																				PostD1	24	R	0.571429
																				PostD1	24	R	0.580645
																				PostD1	24	R	0.62069
																				PostD1	24	R	0.571429
																				PostD1	24	R	0.612903
																				PostD1	24	R	0.566667
																				PostD1	24	R	0.586207
																				PostD1	24	R	0.5625
		Average	0.553619				Average	0.53583				Average	0.538287				Average	0.539015				Average	0.542825
		St. Deviation	0.0434797				St. Deviation	0.0314698				St. Deviation	0.0377179				St. Deviation	0.0342423				St. Deviation	0.0412359
		Total Number Steps	274				Total Number Steps	294				Total Number Steps	302				Total Number Steps	278				Total Number Steps	310
		# of steps outside 2 S.D.	13				# of steps outside 2 S.D.	3				# of steps outside 2 S.D.	6				# of steps outside 2 S.D.	7				# of steps outside 2 S.D.	10

## Sheet: Injured Swim Phase
Time point	Animal ID	Pass Direction	Hindlimb Swim Phase			Time point	Animal ID	Pass Direction	Hindlimb Swim Phase		Time point	Animal ID	Pass Direction	Hindlimb Swim Phase		Time point	Animal ID	Pass Direction	Hindlimb Swim Phase		Time point	Animal ID	Pass Direction	Hindlimb Swim Phase		Time point	Animal ID	Pass Direction	Hindlimb Swim Phase
6	1	L	0.625			D2D5	1	L	0.535714		D2D8	1	L	0.555556		10	1	L	0.586207		D3D8	1	L	0.857143		12	1	L	0.6
6	1	L	0.5			D2D5	1	L	0.518519		D2D8	1	L	0.571429		10	1	L	0.607143		D3D8	1	L	0.857143		12	1	L	0.515152
6	1	L	0.5			D2D5	1	L	0.518519		D2D8	1	L	0.6		10	1	L	0.655172		D3D8	1	L	0.821429		12	1	L	0.5625
6	1	L	0.555556			D2D5	1	L	0.68		D2D8	1	L	0.555556		10	1	L	0.571429		D3D8	1	L	0.769231		12	1	L	0.606061
6	1	L	1			D2D5	1	L	0.576923		D2D8	1	L	0.5		10	1	L	0.607143		D3D8	1	L	0.615385		12	1	L	0.580645
6	1	L	0.88			D2D5	1	L	0.653846		D2D8	1	L	0.782609		10	1	L	0.566667		D3D8	1	L	0.517241		12	1	L	0.588235
6	1	L	0.72			D2D5	1	L	0.76		D2D8	1	L	1		10	1	L	0.548387		D3D8	1	L	0.548387		12	1	L	0.545455
6	1	L	0.571429			D2D5	1	L	0.615385		D2D8	3	L	0.5		10	1	L	0.5		D3D8	1	L	0.923077		12	1	L	0.580645
6	1	L	0.551724			D2D5	1	L	0.517241		D2D8	3	L	0.535714		10	1	L	0.535714		D3D8	1	L	0.913043		12	1	L	0.774194
6	1	L	0.724138			D2D5	3	L	0.535714		D2D8	3	L	0.551724		10	1	L	0.571429		D3D8	1	L	1		12	1	L	0.766667
6	3	L	0.538462			D2D5	3	L	0.517241		D2D8	3	L	0.5		10	1	L	0.518519		D3D8	1	L	1		12	1	L	0.666667
6	3	L	0.586207			D2D5	3	L	0.535714		D2D8	3	L	0.5		10	1	L	0.655172		D3D8	1	L	0.896552		12	1	L	0.555556
6	3	L	0.592593			D2D5	3	L	0.551724		D2D8	3	L	0.5		10	1	L	0.566667		D3D8	3	L	0.5		12	1	L	0.516129
6	3	L	0.621739			D2D5	3	L	0.607143		D2D8	3	L	0.516129		10	1	L	0.548387		D3D8	3	L	0.538462		12	1	L	0.548387
6	3	L	0.666667			D2D5	4	L	0.615161		D2D8	3	L	0.516129		10	1	L	0.533333		D3D8	3	L	0.52		12	1	L	0.566667
6	3	L	0.623846			D2D5	4	L	0.558824		D2D8	4	L	0.884615		10	1	L	0.551724		D3D8	3	L	0.586207		12	1	L	0.5625
6	3	L	0.52			D2D5	4	L	0.571429		D2D8	4	L	0.96		10	1	L	0.551724		D3D8	3	L	0.622857		12	3	L	0.565217
6	3	L	0.518519			D2D5	4	L	0.575758		D2D8	4	L	0.61963		10	3	L	0.521739		D3D8	3	L	0.623846		12	3	L	0.583333
6	3	L	0.555556			D2D5	4	L	0.625		D2D8	4	L	0.566667		10	3	L	0.52381		D3D8	3	L	0.518519		12	3	L	0.555556
6	4	L	0.516129			D2D5	4	L	0.6		D2D8	4	L	0.607143		10	3	L	0.619048		D3D8	3	L	0.607143		12	3	L	0.533333
6	4	L	0.548387			D2D5	4	L	0.53125		D2D8	4	L	0.694516		10	3	L	0.622174		D3D8	3	L	0.913043		12	3	L	0.583333
6	4	L	0.5625			D2D5	4	L	0.575758		D2D8	4	L	0.586207		10	3	L	0.653846		D3D8	3	L	0.904762		12	3	L	0.5
6	4	L	0.892857			D2D5	6	L	0.5		D2D8	4	L	0.62069		10	3	L	0.538462		D3D8	3	L	0.956522		12	3	L	0.52
6	4	L	0.923077			D2D5	6	L	0.5		D2D8	4	L	0.75		10	3	L	0.607143		D3D8	3	L	1		12	3	L	0.666667
6	4	L	0.96			D2D5	6	L	0.5		D2D8	6	L	1		10	3	L	0.571429		D3D8	4	L	0.5		12	3	L	0.666667
6	4	L	0.5			D2D5	6	L	0.5		D2D8	6	L	0.793103		10	3	L	0.592593		D3D8	4	L	0.535714		12	3	L	0.68
6	4	L	0.533333			D2D5	6	L	0.62069		D2D8	6	L	0.740741		10	3	L	0.538462		D3D8	4	L	0.533333		12	3	L	0.607143
6	6	L	0.551724			D2D5	6	L	0.53125		D2D8	6	L	0.571429		10	3	L	0.62963		D3D8	4	L	0.6		12	3	L	0.551724
6	6	L	0.517241			D2D5	6	L	0.566667		D2D8	6	L	0.533333		10	3	L	0.642857		D3D8	4	L	0.59375		12	3	L	0.615385
6	6	L	0.586207			D2D5	6	L	0.645161		D2D8	6	L	0.62069		10	3	L	0.64		D3D8	4	L	0.62069		12	3	L	0.666667
6	6	L	0.571429			D2D5	6	L	0.714286		D2D8	6	L	0.709677		10	3	L	0.6		D3D8	4	L	0.571429		12	3	L	0.666667
6	6	L	0.5625			D2D5	6	L	0.615172		D2D8	6	L	0.733333		10	3	L	0.714286		D3D8	4	L	0.62069		12	3	L	0.68
6	6	L	0.624571			D2D5	7	L	0.551724		D2D8	6	L	0.571429		10	3	L	0.809524		D3D8	4	L	0.566667		12	4	L	0.56
6	6	L	0.612903			D2D5	7	L	0.633333		D2D8	6	L	0.571429		10	4	L	0.666667		D3D8	4	L	0.575758		12	4	L	0.5
6	6	L	0.545455			D2D5	7	L	0.62069		D2D8	6	L	0.59375		10	4	L	0.709677		D3D8	4	L	0.533333		12	4	L	0.62963
6	6	L	0.529412			D2D5	7	L	0.62069		D2D8	7	L	0.533333		10	4	L	0.548387		D3D8	4	L	0.517241		12	4	L	0.7
6	6	L	0.529412			D2D5	7	L	0.592593		D2D8	7	L	0.5		10	4	L	0.533333		D3D8	4	L	0.5625		12	4	L	0.84
6	6	L	0.529412			D2D5	7	L	0.6		D2D8	7	L	0.517241		10	4	L	0.612903		D3D8	6	L	0.571429		12	4	L	0.6
6	7	L	0.62069			D2D5	9	L	0.53125		D2D8	7	L	0.548387		10	4	L	0.709677		D3D8	6	L	0.53125		12	4	L	0.538462
6	7	L	0.6			D2D5	9	L	0.59375		D2D8	7	L	0.548387		10	4	L	0.730769		D3D8	6	L	0.529412		12	4	L	0.714286
6	7	L	0.612903			D2D5	9	L	0.586207		D2D8	7	L	0.516129		10	4	L	0.774194		D3D8	6	L	0.571429		12	4	L	0.777778
6	7	L	0.551724			D2D5	9	L	0.607143		D2D8	7	L	0.566667		10	4	L	0.694444		D3D8	6	L	0.542857		12	4	L	0.689655
6	7	L	0.5			D2D5	9	L	0.916667		D2D8	7	L	0.545455		10	4	L	0.516129		D3D8	6	L	0.542857		12	4	L	0.625
6	7	L	0.5			D2D5	9	L	0.888889		D2D8	9	L	0.558824		10	4	L	0.516129		D3D8	6	L	0.617059		12	4	L	0.727273
6	7	L	0.5			D2D5	9	L	0.857143		D2D8	9	L	0.515152		10	4	L	0.645161		D3D8	6	L	0.625		12	4	L	0.814815
6	7	L	0.533333			D2D5	9	L	0.777778		D2D8	9	L	0.533333		10	4	L	0.871795		D3D8	6	L	0.606061		12	6	L	0.533333
6	9	L	0.517241			D2D5	9	L	0.875		D2D8	9	L	0.580645		10	4	L	0.820513		D3D8	6	L	0.571429		12	6	L	0.527778
6	9	L	0.53125			D2D5	9	L	0.740741		D2D8	9	L	0.875		10	4	L	0.689655		D3D8	6	L	0.555556		12	6	L	0.6
6	9	L	0.529412			D2D5	9	L	0.655172		D2D8	9	L	0.578947		10	4	L	0.678571		D3D8	6	L	0.571429		12	6	L	0.65625
6	9	L	0.513514			D2D5	9	L	0.633333		D2D8	9	L	0.777778		10	4	L	0.636364		D3D8	6	L	0.636364		12	6	L	0.6
6	9	L	0.606061			D2D5	9	L	0.607143		D2D8	9	L	0.777778		10	4	L	0.5		D3D8	7	L	0.62069		12	6	L	0.533333
6	9	L	0.580645			D2D5	11	L	0.535714		D2D8	9	L	1		10	4	L	0.5		D3D8	7	L	0.583333		12	6	L	0.548387
6	9	L	0.575758			D2D5	11	L	0.615172		D2D8	9	L	0.75		10	4	L	0.655172		D3D8	7	L	0.59375		12	6	L	0.5
6	9	L	0.5			D2D5	11	L	0.954545		D2D8	9	L	0.615172		10	4	L	0.676471		D3D8	7	L	0.580645		12	6	L	0.516129
6	9	L	0.625			D2D5	11	L	0.541667		D2D8	11	L	0.769231		10	6	L	0.694444		D3D8	7	L	0.517241		12	6	L	0.558824
6	9	L	0.617647			D2D5	11	L	0.6		D2D8	11	L	1		10	6	L	0.666667		D3D8	7	L	0.575758		12	6	L	0.542857
6	9	L	0.606061			D2D5	11	L	0.863636		D2D8	11	L	0.714286		10	6	L	0.542857		D3D8	7	L	0.586207		12	6	L	0.516129
6	9	L	0.611111			D2D5	11	L	0.961538		D2D8	11	L	0.5		10	6	L	0.617647		D3D8	7	L	0.588235		12	6	L	0.566667
6	11	L	1			D2D5	11	L	1		D2D8	11	L	1		10	6	L	0.59375		D3D8	7	L	0.59375		12	6	L	0.53125
6	11	L	0.92			D2D5	12	L	0.586207		D2D8	11	L	0.88		10	6	L	0.617647		D3D8	7	L	0.533333		12	6	L	0.575758
6	11	L	0.875			D2D5	12	L	0.62069		D2D8	11	L	0.580645		10	6	L	0.647059		D3D8	7	L	0.516129		12	7	L	0.517241
6	11	L	0.62069			D2D5	12	L	0.535714		D2D8	12	L	0.71875		10	6	L	0.529412		D3D8	7	L	0.5		12	7	L	0.517241
6	11	L	0.758621			D2D5	12	L	0.5625		D2D8	12	L	0.857143		10	6	L	0.5625		D3D8	9	L	0.53125		12	7	L	0.538462
6	12	L	0.758621			D2D5	12	L	0.6		D2D8	12	L	1		10	6	L	0.617647		D3D8	9	L	0.571429		12	7	L	0.551724
6	12	L	0.75			D2D5	12	L	0.535714		D2D8	12	L	0.966667		10	6	L	0.516129		D3D8	9	L	0.545455		12	7	L	0.518519
6	12	L	0.677419			D2D5	12	L	0.5		D2D8	12	L	1		10	6	L	0.5625		D3D8	9	L	0.55		12	7	L	0.566667
6	12	L	0.666667			D2D5	12	L	1		D2D8	12	L	0.83871		10	6	L	0.580645		D3D8	9	L	0.5		12	7	L	0.580645
6	12	L	0.633333			D2D5	12	L	0.961538		D2D8	12	L	1		10	6	L	0.612903		D3D8	9	L	0.567568		12	7	L	0.580645
6	12	L	0.724138			D2D5	12	L	0.892857		D2D8	12	L	1		10	6	L	0.548387		D3D8	9	L	0.571429		12	7	L	0.566667
6	12	L	0.740741			D2D5	12	L	0.925926		D2D8	12	L	1		10	7	L	0.62069		D3D8	9	L	0.685714		12	7	L	0.586207
6	12	L	0.7			D2D5	12	L	0.961538		D2D8	12	L	0.935484		10	7	L	0.677419		D3D8	9	L	0.805556		12	7	L	0.586207
6	12	L	0.622857			D2D5	14	L	0.571429		D2D8	14	L	0.518519		10	7	L	0.71875		D3D8	9	L	1		12	7	L	0.535714
6	12	L	1			D2D5	14	L	0.518519		D2D8	14	L	0.538462		10	7	L	0.777778		D3D8	9	L	0.9375		12	7	L	0.666667
6	12	L	0.9			D2D5	14	L	0.538462		D2D8	14	L	0.56		10	7	L	0.92		D3D8	11	L	0.689655		12	7	L	0.633333
6	12	L	0.862069			D2D5	14	L	0.518519		D2D8	14	L	0.538462		10	7	L	0.741935		D3D8	11	L	0.857143		12	9	L	0.583333
6	12	L	0.862069			D2D5	14	L	0.535714		D2D8	14	L	0.869565		10	7	L	0.545455		D3D8	11	L	0.964286		12	9	L	0.577778
6	12	L	0.827586			D2D5	14	L	0.551724		D2D8	14	L	0.826087		10	7	L	0.621579		D3D8	11	L	0.733333		12	9	L	0.755556
6	14	L	0.535714			D2D5	15	L	0.566667		D2D8	14	L	1		10	7	L	0.677419		D3D8	11	L	0.611111		12	9	L	0.575
6	14	L	0.576923			D2D5	15	L	0.6		D2D8	15	L	0.580645		10	7	L	0.606061		D3D8	11	L	0.548387		12	9	L	0.517241
6	14	L	0.592593			D2D5	15	L	0.612903		D2D8	15	L	0.625		10	7	L	0.515152		D3D8	11	L	0.84375		12	9	L	0.558824
6	14	L	0.653846			D2D5	15	L	0.6		D2D8	15	L	0.514286		10	7	L	0.545455		D3D8	11	L	0.90625		12	9	L	0.536585
6	14	L	0.653846			D2D5	15	L	0.655172		D2D8	15	L	0.8		10	7	L	0.580645		D3D8	11	L	0.947368		12	9	L	0.5
6	14	L	0.535714			D2D5	15	L	0.622857		D2D8	15	L	0.9		10	7	L	0.5625		D3D8	11	L	0.710526		12	9	L	0.52381
6	14	L	0.555556			D2D5	15	L	0.62963		D2D8	15	L	0.966667		10	7	L	0.575758		D3D8	11	L	0.571429		12	9	L	0.512195
6	15	L	0.5			D2D5	15	L	0.566667		D2D8	15	L	0.78125		10	11	L	0.833333		D3D8	11	L	0.806452		12	9	L	0.548387
6	15	L	0.5			D2D5	15	L	0.6		D2D8	15	L	0.59375		10	11	L	0.923077		D3D8	11	L	0.595238		12	9	L	0.514286
6	15	L	0.517241			D2D5	15	L	0.580645		D2D8	15	L	0.633333		10	11	L	1		D3D8	12	L	0.666667		12	9	L	0.628571
6	15	L	0.5			D2D5	1	R	0.515152		D2D8	15	L	0.580645		10	11	L	0.846154		D3D8	12	L	0.588235		12	14	L	0.542857
6	15	L	0.518519			D2D5	1	R	0.551724		D2D8	15	L	0.5		10	11	L	0.678571		D3D8	12	L	0.545455		12	14	L	0.529412
6	15	L	0.5			D2D5	1	R	0.518519		D2D8	15	L	0.551724		10	11	L	0.586207		D3D8	12	L	0.527778		12	14	L	0.527778
6	15	L	0.535714			D2D5	1	R	0.606061		D2D8	1	R	0.517241		10	11	L	0.958333		D3D8	12	L	0.548387		12	14	L	0.575758
6	15	L	0.535714			D2D5	1	R	0.529412		D2D8	1	R	0.516129		10	11	L	0.821429		D3D8	12	L	0.529412		12	14	L	0.580645
6	15	L	0.533333			D2D5	1	R	0.617647		D2D8	1	R	0.551724		10	11	L	0.8		D3D8	12	L	0.666667		12	14	L	0.785714
6	15	L	0.533333			D2D5	1	R	0.588235		D2D8	1	R	0.586207		10	11	L	0.769231		D3D8	12	L	0.666667		12	14	L	0.6875
6	15	L	0.592593			D2D5	1	R	0.7		D2D8	1	R	0.517241		10	11	L	0.692308		D3D8	12	L	0.677419		12	14	L	0.645161
6	1	R	1			D2D5	3	R	1		D2D8	1	R	0.6		10	11	L	0.551724		D3D8	12	L	0.6		12	14	L	0.633333
6	1	R	0.964286			D2D5	3	R	1		D2D8	1	R	0.6		10	11	L	0.607143		D3D8	12	L	0.53125		12	14	L	0.615161
6	1	R	1			D2D5	3	R	1		D2D8	1	R	0.535714		10	11	L	0.703704		D3D8	14	L	0.516129		12	14	L	0.548387
6	1	R	0.703704			D2D5	3	R	0.576923		D2D8	1	R	0.551724		10	11	L	0.769231		D3D8	14	L	0.5625		12	14	L	0.551724
6	1	R	0.75			D2D5	3	R	0.538462		D2D8	3	R	0.954545		10	11	L	0.857143		D3D8	14	L	0.625		12	14	L	0.533333
6	1	R	0.806452			D2D5	3	R	0.962963		D2D8	3	R	1		10	11	L	0.964286		D3D8	14	L	0.666667		12	14	L	0.6
6	1	R	0.774194			D2D5	3	R	0.962963		D2D8	3	R	1		10	12	L	0.529412		D3D8	14	L	0.612903		12	15	L	0.586207
6	1	R	0.8125			D2D5	4	R	0.545455		D2D8	3	R	0.956522		10	12	L	0.617647		D3D8	14	L	0.548387		12	15	L	0.566667
6	1	R	0.793103			D2D5	4	R	0.53125		D2D8	3	R	0.954545		10	12	L	0.617647		D3D8	14	L	0.606061		12	15	L	0.633333
6	1	R	0.925926			D2D5	4	R	0.548387		D2D8	3	R	0.92		10	12	L	0.558824		D3D8	14	L	0.588235		12	15	L	0.615161
6	1	R	1			D2D5	4	R	0.548387		D2D8	3	R	1		10	12	L	0.583333		D3D8	14	L	0.548387		12	15	L	0.655172
6	3	R	0.952381			D2D5	4	R	0.5		D2D8	3	R	0.666667		10	12	L	0.638889		D3D8	14	L	0.533333		12	15	L	0.624857
6	3	R	0.913043			D2D5	4	R	0.516129		D2D8	3	R	0.6		10	12	L	0.631579		D3D8	14	L	0.516129		12	15	L	0.612903
6	3	R	0.916667			D2D5	4	R	0.53125		D2D8	3	R	0.548387		10	12	L	0.666667		D3D8	14	L	0.529412		12	15	L	0.766667
6	3	R	0.68			D2D5	6	R	0.545455		D2D8	3	R	0.517241		10	12	L	0.657895		D3D8	15	L	0.533333		12	15	L	0.514286
6	3	R	0.624172			D2D5	6	R	0.575758		D2D8	4	R	0.551724		10	12	L	0.75		D3D8	15	L	0.517241		12	15	L	0.611111
6	3	R	0.555556			D2D5	6	R	0.53125		D2D8	4	R	0.517241		10	12	L	0.805556		D3D8	15	L	0.517241		12	15	L	0.71875
6	3	R	0.869565			D2D5	6	R	0.586207		D2D8	4	R	0.548387		10	12	L	0.55		D3D8	15	L	0.53125		12	15	L	0.529412
6	3	R	0.913043			D2D5	6	R	0.580645		D2D8	4	R	0.607143		10	12	L	0.648649		D3D8	15	L	0.548387		12	15	L	0.6875
6	3	R	1			D2D5	6	R	0.548387		D2D8	4	R	0.551724		10	12	L	0.655172		D3D8	15	L	0.533333		12	15	L	0.605882
6	3	R	1			D2D5	6	R	0.533333		D2D8	4	R	0.533333		10	12	L	0.717949		D3D8	15	L	0.821429		12	15	L	0.607143
6	4	R	0.666667			D2D5	6	R	0.5625		D2D8	4	R	0.533333		10	12	L	0.833333		D3D8	15	L	0.956522		12	1	R	0.741935
6	4	R	0.612903			D2D5	6	R	0.566667		D2D8	6	R	0.548387		10	12	L	0.75		D3D8	15	L	0.62363		12	1	R	0.678571
6	4	R	0.5			D2D5	7	R	0.62069		D2D8	6	R	0.586207		10	12	L	0.733333		D3D8	15	L	0.535714		12	1	R	0.566667
6	4	R	0.566667			D2D5	7	R	0.633333		D2D8	6	R	0.607143		10	14	L	0.515152		D3D8	15	L	0.53125		12	1	R	0.62069
6	4	R	0.617647			D2D5	7	R	0.655172		D2D8	6	R	0.551724		10	14	L	0.516129		D3D8	15	L	0.551724		12	1	R	0.551724
6	4	R	0.6			D2D5	7	R	0.62069		D2D8	6	R	0.533333		10	14	L	0.533333		D3D8	1	R	0.548387		12	1	R	0.6
6	4	R	0.6			D2D5	7	R	0.606061		D2D8	6	R	0.533333		10	14	L	0.545455		D3D8	1	R	0.548387		12	1	R	0.607143
6	6	R	0.516129			D2D5	7	R	0.59375		D2D8	6	R	0.533333		10	14	L	0.62069		D3D8	1	R	0.515152		12	1	R	0.571429
6	6	R	0.545455			D2D5	9	R	0.5625		D2D8	6	R	0.5625		10	14	L	0.566667		D3D8	1	R	0.53125		12	1	R	0.6
6	6	R	0.612903			D2D5	9	R	0.558824		D2D8	6	R	0.5625		10	14	L	0.516129		D3D8	1	R	0.533333		12	1	R	0.592593
6	6	R	0.59375			D2D5	9	R	0.710526		D2D8	6	R	0.566667		10	14	L	0.5		D3D8	1	R	0.5		12	1	R	0.689655
6	6	R	0.612903			D2D5	9	R	0.675676		D2D8	7	R	0.580645		10	14	L	0.655172		D3D8	1	R	0.53125		12	1	R	0.61625
6	6	R	0.633333			D2D5	9	R	0.542857		D2D8	7	R	0.514286		10	14	L	0.655172		D3D8	1	R	0.545455		12	1	R	0.623471
6	6	R	0.65625			D2D5	9	R	0.548387		D2D8	7	R	0.53125		10	14	L	0.730769		D3D8	1	R	0.5625		12	1	R	0.558824
6	6	R	0.575758			D2D5	9	R	0.53125		D2D8	7	R	0.59375		10	14	L	0.642857		D3D8	1	R	0.5625		12	1	R	0.540541
6	6	R	0.612903			D2D5	9	R	0.551724		D2D8	7	R	0.571429		10	14	L	0.62963		D3D8	1	R	0.612903		12	1	R	0.623571
6	7	R	0.53125			D2D5	9	R	0.5		D2D8	7	R	0.533333		10	15	L	0.642857		D3D8	1	R	0.59375		12	3	R	0.708333
6	7	R	0.53125			D2D5	11	R	0.782609		D2D8	7	R	0.515152		10	15	L	0.62963		D3D8	3	R	0.586207		12	3	R	0.913043
6	7	R	0.5			D2D5	11	R	1		D2D8	7	R	0.515152		10	15	L	0.642857		D3D8	3	R	0.607143		12	3	R	0.956522
6	7	R	0.515152			D2D5	11	R	0.875		D2D8	7	R	0.548387		10	15	L	0.6		D3D8	3	R	0.607143		12	3	R	0.791667
6	7	R	0.529412			D2D5	11	R	0.56		D2D8	9	R	0.958333		10	15	L	0.666667		D3D8	3	R	0.607143		12	3	R	0.62
6	7	R	0.566667			D2D5	11	R	0.692308		D2D8	9	R	0.851852		10	15	L	0.655172		D3D8	3	R	0.571429		12	3	R	0.518519
6	7	R	0.566667			D2D5	12	R	0.606061		D2D8	9	R	0.769231		10	15	L	0.555556		D3D8	3	R	0.518519		12	3	R	0.518519
6	7	R	0.580645			D2D5	12	R	0.575758		D2D8	9	R	0.724138		10	15	L	0.566667		D3D8	3	R	0.5		12	3	R	0.583333
6	9	R	0.777778			D2D5	12	R	0.548387		D2D8	9	R	0.888889		10	15	L	0.53125		D3D8	3	R	0.538462		12	3	R	0.6
6	9	R	1			D2D5	12	R	0.548387		D2D8	9	R	0.884615		10	15	L	0.5		D3D8	3	R	0.5		12	3	R	0.624172
6	9	R	0.931034			D2D5	12	R	0.516129		D2D8	9	R	0.75		10	15	L	0.515152		D3D8	3	R	0.535714		12	3	R	0.666667
6	9	R	0.96			D2D5	12	R	0.586207		D2D8	9	R	0.6		10	15	L	0.580645		D3D8	3	R	0.653846		12	3	R	0.76
6	9	R	0.862069			D2D5	12	R	0.6		D2D8	9	R	0.571429		10	15	L	0.6		D3D8	3	R	0.586207		12	3	R	0.826087
6	9	R	0.857143			D2D5	14	R	0.517241		D2D8	9	R	0.6875		10	15	L	0.606061		D3D8	4	R	1		12	3	R	0.956522
6	9	R	0.793103			D2D5	14	R	0.571429		D2D8	9	R	0.84		10	15	L	0.666667		D3D8	4	R	0.933333		12	3	R	0.961538
6	9	R	0.814815			D2D5	14	R	0.555556		D2D8	9	R	0.888889		10	15	L	0.655172		D3D8	4	R	0.925926		12	4	R	0.542857
6	9	R	0.666667			D2D5	14	R	0.956522		D2D8	11	R	0.961538		10	15	L	0.642857		D3D8	4	R	0.612857		12	4	R	0.555556
6	9	R	0.575758			D2D5	14	R	0.96		D2D8	11	R	0.928571		10	15	L	0.62363		D3D8	4	R	0.551724		12	4	R	0.548387
6	9	R	0.533333			D2D5	14	R	0.607143		D2D8	11	R	0.53125		10	15	L	0.62069		D3D8	4	R	0.566667		12	4	R	0.516129
6	9	R	0.53125			D2D5	14	R	0.7		D2D8	11	R	0.925926		10	15	L	0.571429		D3D8	4	R	0.606061		12	4	R	0.545455
6	11	R	0.857143			D2D5	14	R	0.708333		D2D8	11	R	0.962963		10	15	L	0.517241		D3D8	4	R	0.566667		12	4	R	0.617647
6	11	R	0.892857			D2D5	14	R	0.791667		D2D8	12	R	0.806452		10	1	R	0.538462		D3D8	4	R	0.517241		12	4	R	0.617647
6	11	R	0.758621			D2D5	14	R	0.95		D2D8	12	R	0.846154		10	1	R	0.517241		D3D8	4	R	0.517241		12	4	R	0.515152
6	11	R	0.827586			D2D5	15	R	0.517241		D2D8	12	R	0.821429		10	1	R	0.566667		D3D8	4	R	0.516129		12	4	R	0.53125
6	11	R	0.965517			D2D5	15	R	0.535714		D2D8	12	R	0.548387		10	1	R	0.566667		D3D8	4	R	0.516129		12	4	R	0.580645
6	11	R	0.793103			D2D5	15	R	0.566667		D2D8	12	R	0.53125		10	1	R	0.59375		D3D8	4	R	0.516129		12	4	R	0.580645
6	11	R	0.774194			D2D5	15	R	0.533333		D2D8	12	R	0.53125		10	1	R	0.857143		D3D8	4	R	0.548387		12	4	R	0.566667
6	11	R	1			D2D5	15	R	0.551724		D2D8	12	R	0.59375		10	1	R	0.96		D3D8	4	R	0.516129		12	4	R	0.551724
6	12	R	0.821429			D2D5	15	R	0.5		D2D8	12	R	0.580645		10	1	R	1		D3D8	6	R	0.69697		12	4	R	0.5
6	12	R	1			D2D5	15	R	0.5		D2D8	14	R	0.68		10	1	R	0.961538		D3D8	6	R	0.657143		12	6	R	0.514286
6	12	R	0.882353			D2D5	15	R	0.777778		D2D8	14	R	0.769231		10	1	R	0.961538		D3D8	6	R	0.709677		12	6	R	0.529412
6	12	R	0.851852			D2D5	15	R	0.769231		D2D8	14	R	0.72		10	1	R	1		D3D8	6	R	0.636364		12	6	R	0.516129
6	12	R	0.96			D2D5	15	R	0.586207		D2D8	14	R	0.84		10	1	R	1		D3D8	6	R	0.527778		12	6	R	0.53125
6	12	R	0.633333			D2D5	15	R	0.53125		D2D8	14	R	0.535714		10	1	R	0.962963		D3D8	6	R	0.515152		12	6	R	0.5
6	12	R	0.580645								D2D8	14	R	0.571429		10	1	R	0.964286		D3D8	6	R	0.555556		12	6	R	0.575758
6	14	R	0.555556								D2D8	14	R	0.580645		10	1	R	0.821429		D3D8	6	R	0.6		12	6	R	0.580645
6	14	R	0.56								D2D8	15	R	0.96		10	1	R	0.689655		D3D8	6	R	0.5625		12	6	R	0.575758
6	14	R	0.633333								D2D8	15	R	0.884615		10	3	R	0.541667		D3D8	6	R	0.516129		12	6	R	0.606061
6	14	R	0.75								D2D8	15	R	0.888889		10	3	R	0.5		D3D8	6	R	0.5		12	6	R	0.566667
6	14	R	0.84								D2D8	15	R	1		10	3	R	0.538462		D3D8	6	R	0.515152		12	6	R	0.545455
6	14	R	0.896552								D2D8	15	R	1		10	3	R	0.6		D3D8	6	R	0.515152		12	6	R	0.625
6	14	R	0.931034								D2D8	15	R	0.961538		10	3	R	0.576923		D3D8	7	R	0.558824		12	6	R	0.5
6	14	R	0.958333								D2D8	15	R	0.535714		10	3	R	0.592593		D3D8	7	R	0.5625		12	6	R	0.5
6	14	R	0.958333								D2D8	15	R	0.518519		10	3	R	0.576923		D3D8	7	R	0.59375		12	6	R	0.53125
6	14	R	0.8								D2D8	15	R	0.535714		10	3	R	0.612174		D3D8	7	R	0.615		12	6	R	0.5
6	14	R	0.76								D2D8	15	R	0.515152		10	3	R	0.772727		D3D8	7	R	0.59375		12	6	R	0.516129
6	15	R	0.592593													10	3	R	0.904762		D3D8	7	R	0.53125		12	7	R	0.551724
6	15	R	0.576923													10	3	R	1		D3D8	7	R	0.517241		12	7	R	0.5
6	15	R	0.571429													10	3	R	0.869565		D3D8	7	R	0.548387		12	7	R	0.518519
6	15	R	0.62069													10	3	R	1		D3D8	7	R	0.545455		12	7	R	0.571429
6	15	R	0.518519													10	3	R	1		D3D8	7	R	0.514286		12	7	R	0.617647
6	15	R	0.5													10	3	R	1		D3D8	7	R	0.542857		12	7	R	0.624172
6	15	R	0.535714													10	3	R	1		D3D8	7	R	0.533333		12	7	R	0.59375
6	15	R	0.518519													10	3	R	0.958333		D3D8	9	R	0.558824		12	7	R	0.62069
6	15	R	0.53125													10	4	R	0.516129		D3D8	9	R	0.585366		12	7	R	0.571429
6	15	R	0.566667													10	4	R	0.516129		D3D8	9	R	0.674419		12	7	R	0.571429
																10	4	R	0.516129		D3D8	9	R	0.536585		12	7	R	0.551724
																10	4	R	0.516129		D3D8	9	R	0.512195		12	7	R	0.548387
																10	4	R	0.516129		D3D8	9	R	0.509804		12	9	R	0.806452
																10	4	R	0.558824		D3D8	9	R	0.585366		12	9	R	0.605263
																10	4	R	0.548387		D3D8	9	R	0.547619		12	9	R	0.575
																10	4	R	0.558824		D3D8	9	R	0.548387		12	9	R	0.625
																10	4	R	0.545455		D3D8	9	R	0.729167		12	9	R	0.71875
																10	4	R	0.5625		D3D8	9	R	0.862069		12	9	R	0.5625
																10	4	R	0.515152		D3D8	9	R	0.564103		12	9	R	0.53125
																10	4	R	0.515152		D3D8	11	R	0.586207		12	9	R	0.538462
																10	4	R	0.566667		D3D8	11	R	0.529412		12	9	R	0.65625
																10	4	R	0.566667		D3D8	11	R	0.533333		12	9	R	0.611111
																10	4	R	0.53125		D3D8	11	R	0.535714		12	9	R	0.53125
																10	4	R	0.558824		D3D8	11	R	0.551724		12	9	R	0.515152
																10	6	R	0.515152		D3D8	11	R	0.62069		12	14	R	0.607143
																10	6	R	0.515152		D3D8	11	R	0.678571		12	14	R	0.6
																10	6	R	0.53125		D3D8	11	R	0.703704		12	14	R	0.617647
																10	6	R	0.515152		D3D8	11	R	0.807692		12	14	R	0.571429
																10	6	R	0.53125		D3D8	11	R	0.615161		12	14	R	0.516129
																10	6	R	0.5		D3D8	11	R	0.785714		12	14	R	0.580645
																10	6	R	0.515152		D3D8	11	R	0.833333		12	14	R	0.7
																10	6	R	0.515152		D3D8	12	R	0.529412		12	14	R	0.71875
																10	6	R	0.53125		D3D8	12	R	0.558824		12	14	R	0.928571
																10	6	R	0.516129		D3D8	12	R	0.606061		12	14	R	1
																10	6	R	0.5625		D3D8	12	R	0.633333		12	14	R	0.925926
																10	6	R	0.5625		D3D8	12	R	0.53125		12	14	R	0.5625
																10	6	R	0.545455		D3D8	12	R	0.548387		12	14	R	0.625
																10	6	R	0.606061		D3D8	12	R	0.612903		12	14	R	0.571429
																10	6	R	0.625		D3D8	12	R	0.545455		12	14	R	0.555556
																10	7	R	0.548387		D3D8	12	R	0.514286		12	15	R	0.535714
																10	7	R	0.59375		D3D8	12	R	0.53125		12	15	R	0.586207
																10	7	R	0.6		D3D8	12	R	0.515152		12	15	R	0.571429
																10	7	R	0.612903		D3D8	12	R	0.545455		12	15	R	0.571429
																10	7	R	0.615161		D3D8	12	R	0.580645		12	15	R	0.615385
																10	7	R	0.5		D3D8	14	R	0.538462		12	15	R	0.571429
																10	7	R	0.5		D3D8	14	R	0.517241		12	15	R	0.607143
																10	7	R	0.533333		D3D8	14	R	0.535714		12	15	R	0.916667
																10	7	R	0.517241		D3D8	14	R	0.566667		12	15	R	0.875
																10	7	R	0.53125		D3D8	14	R	0.612903		12	15	R	0.884615
																10	7	R	0.516129		D3D8	14	R	0.566667		12	15	R	0.88
																10	7	R	0.514286		D3D8	14	R	0.548387		12	15	R	0.88
																10	11	R	0.625		D3D8	14	R	0.53125		12	15	R	0.62963
																10	11	R	0.529412		D3D8	14	R	0.548387		12	15	R	0.612308
																10	11	R	0.625		D3D8	14	R	0.617059		12	15	R	0.6
																10	11	R	0.633333		D3D8	15	R	0.724138		12	15	R	0.571429
																10	11	R	0.793103		D3D8	15	R	0.666667
																10	11	R	0.612903		D3D8	15	R	0.566667
																10	11	R	0.666667		D3D8	15	R	0.6
																10	11	R	0.806452		D3D8	15	R	0.566667
																10	11	R	0.967742		D3D8	15	R	0.548387
																10	11	R	0.655172		D3D8	15	R	0.655172
																10	11	R	0.862069		D3D8	15	R	0.633333
																10	11	R	0.965517		D3D8	15	R	0.69697
																10	11	R	0.757576		D3D8	15	R	0.833333
																10	11	R	0.558824		D3D8	15	R	0.851852
																10	12	R	0.8		D3D8	15	R	0.806452
																10	12	R	0.83871		D3D8	15	R	0.607143
																10	12	R	0.928571
																10	12	R	0.964286
																10	12	R	1
																10	12	R	0.83871
																10	12	R	1
																10	12	R	1
																10	12	R	0.962963
																10	12	R	0.964286
																10	12	R	0.624172
																10	12	R	0.606061
																10	12	R	0.677419
																10	14	R	0.655172
																10	14	R	0.692308
																10	14	R	0.62963
																10	14	R	0.642857
																10	14	R	0.642857
																10	14	R	0.566667
																10	14	R	0.551724
																10	14	R	0.551724
																10	14	R	0.586207
																10	14	R	0.548387
																10	14	R	0.580645
																10	15	R	0.5
																10	15	R	0.516129
																10	15	R	0.517241
																10	15	R	0.545455
																10	15	R	0.53125
																10	15	R	0.923077
																10	15	R	1
																10	15	R	0.862069
																10	15	R	0.758621
																10	15	R	0.615161
																10	15	R	0.517241
																10	15	R	0.535714
																10	15	R	0.517241
																10	15	R	0.516129
		Average	0.67727					Average	0.634287				Average	0.684256				Average	0.652522				Average	0.615567				Average	0.609648
		St. Deviation	0.160412					St. Deviation	0.139871				St. Deviation	0.173261				St. Deviation	0.142947				St. Deviation	0.123672				St. Deviation	0.10118
		Total Number Steps	188					Total Number Steps	166				Total Number Steps	178				Total Number Steps	281				Total Number Steps	245				Total Number Steps	233
		# of steps outside 2 S.D.	77					# of steps outside 2 S.D.	43				# of steps outside 2 S.D.	73				# of steps outside 2 S.D.	113				# of steps outside 2 S.D.	57				# of steps outside 2 S.D.	51
